# Supplementary material
Source: PubMed Central journal article supplement (PMC2777642)
Supplement: NIHMS155549-supplement-supporting_information.pdf [file NIHMS155549-supplement-supporting_information.pdf]

Introduction of Hetero Functional Group onto Molecular hexagons by Coordination  
Driven Self Assembly

Koushik Ghosh<sup>†</sup>, Jiming Hu<sup>†, Φ</sup>, Haibo Yang<sup>‡</sup>, Brian H Northrop<sup>†</sup>, Henry S White<sup>†\*</sup>,  
Peter J Stang<sup>†\*</sup>

<sup>†</sup>*Department of Chemistry, University of Utah, 315 South 1400 East, RM, 2020, Salt Lake City, Utah,  
84112*

<sup>‡</sup>*Shanghai Key Laboratory of Green Chemistry and Chemical Processes, Department of Chemistry,  
East China Normal University, Shanghai 200062, China*

[stang@chem.utah.edu](mailto:stang@chem.utah.edu)

Table of Contents

|                                                                                                      |         |
|------------------------------------------------------------------------------------------------------|---------|
| General Experimental Procedure .....                                                                 | S2      |
| <sup>1</sup> H, and <sup>31</sup> P NMR spectra of <b>5</b> , <b>6</b> , <b>8</b> and <b>9</b> ..... | S3-S6   |
| ESI/MS of <b>8</b> and <b>9</b> .....                                                                | S7-S9   |
| <sup>1</sup> H- <sup>1</sup> H COSY and NOESY NMR spectra of <b>8</b> and <b>9</b> .....             | S10-S12 |
| Experimental Data for <sup>1</sup> H NMR Titration Experiments .....                                 | S13-S16 |
| Electrochemical Studies .....                                                                        | S17-S21 |
| Computational Procedures and Calculated Models for <b>5</b> and <b>8</b> .....                       | S22     |
| Table of atom coordinates .....                                                                      | S24-S73 |

\* To whom correspondence should be addressed.

### **General Experimental Section:**

All reagents were purchased and used without further purification. NMR spectra were recorded on a 500 MHz spectrometer. The  $^1\text{H}$  NMR chemical shifts are reported relative to residual solvent signals, and  $^{31}\text{P}$  NMR resonances are referenced to an external unlocked sample of 85%  $\text{H}_3\text{PO}_4$  ( $\delta$  0.0). Mass spectra for **5**, **6**, **8** and **9** were recorded on a Quattro II triple-quadrupole mass spectrometer using electrospray ionization.

**Figure S1.** A)  $^1\text{H}$  and B)  $^{31}\text{P}$  NMR spectra of **5** in  $\text{CD}_2\text{Cl}_2$

A.

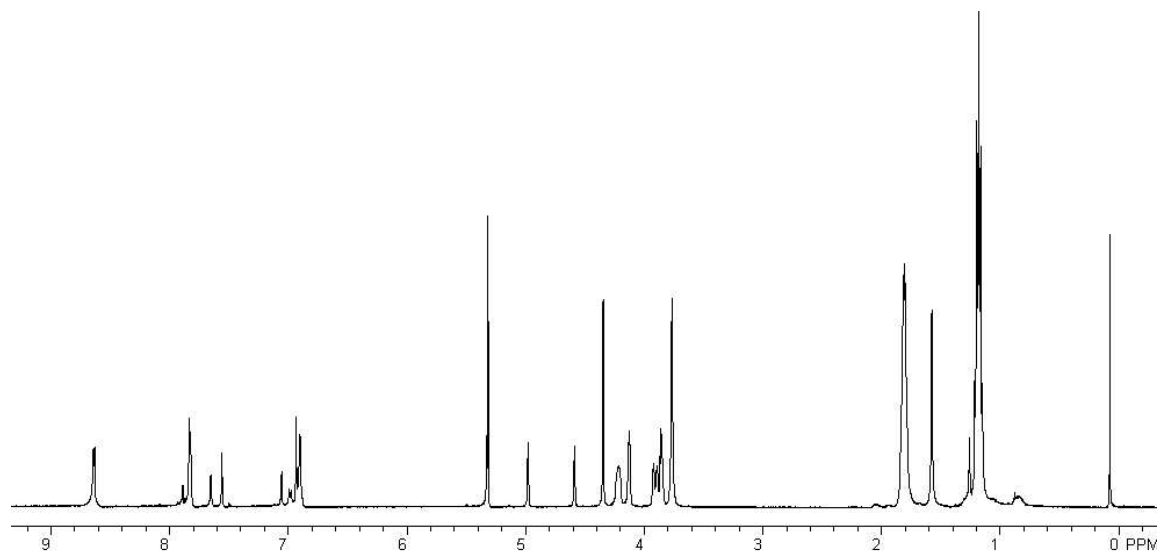

B.

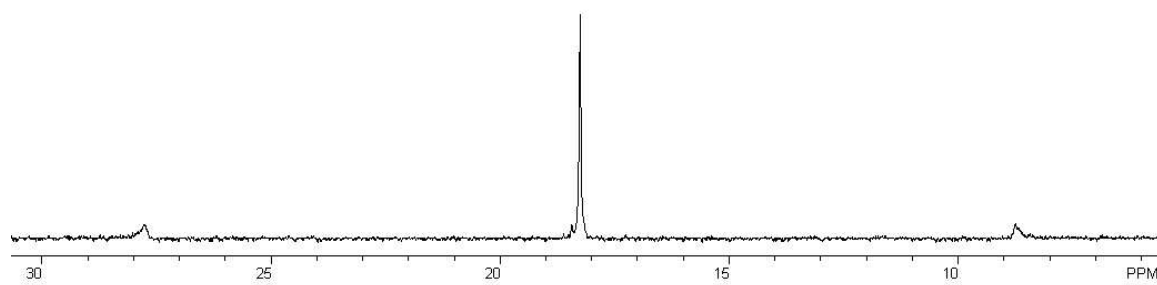

**Figure S2.** A)  $^1\text{H}$  and B)  $^{31}\text{P}$  NMR spectra of **6** in  $\text{CD}_2\text{Cl}_2$

**A.**

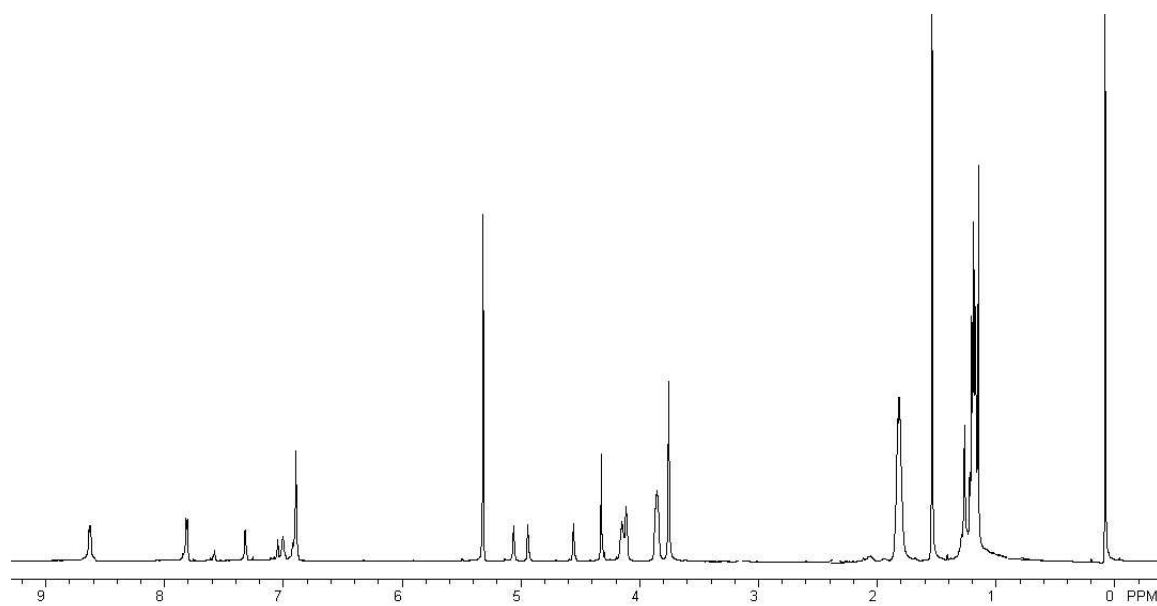

**B**

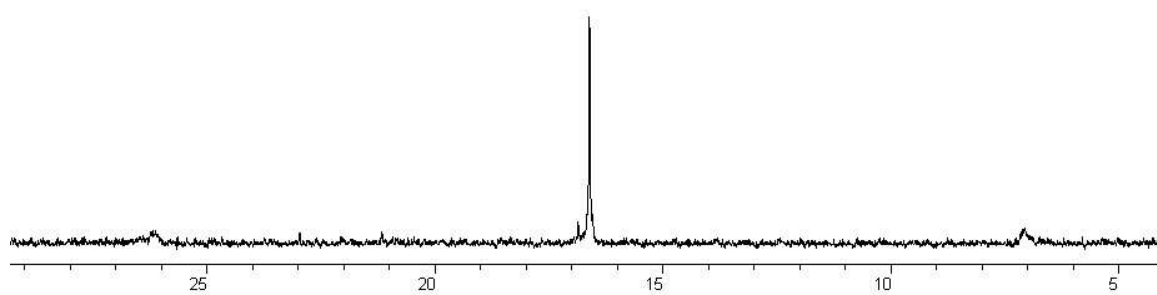

**Figure S3.** A)  $^1\text{H}$  and B)  $^{31}\text{P}$  NMR spectrum of **8** in  $\text{CD}_2\text{Cl}_2$ .

A.

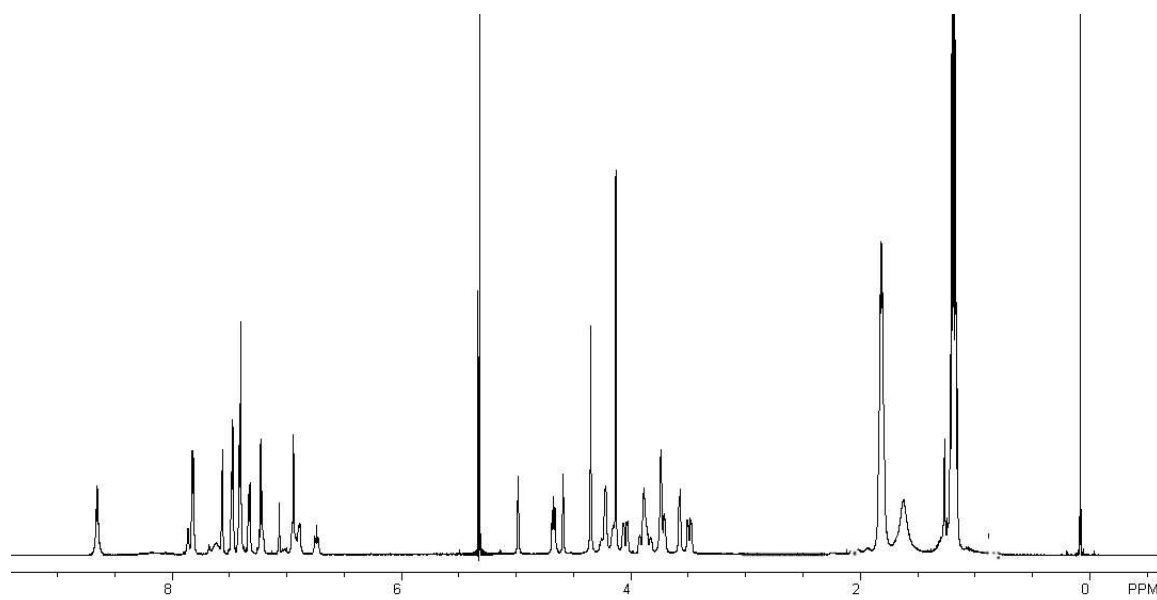

B.

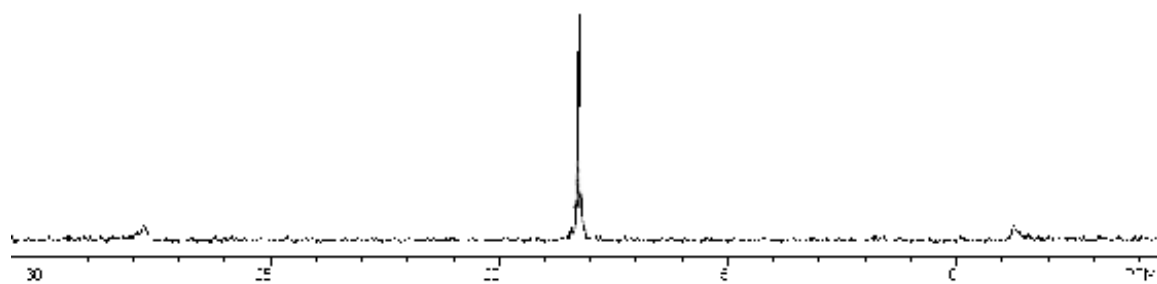

**Figure S4.** A)  $^1\text{H}$  and B)  $^{31}\text{P}$  NMR spectra of **9** in  $\text{CD}_2\text{Cl}_2$ .

A.

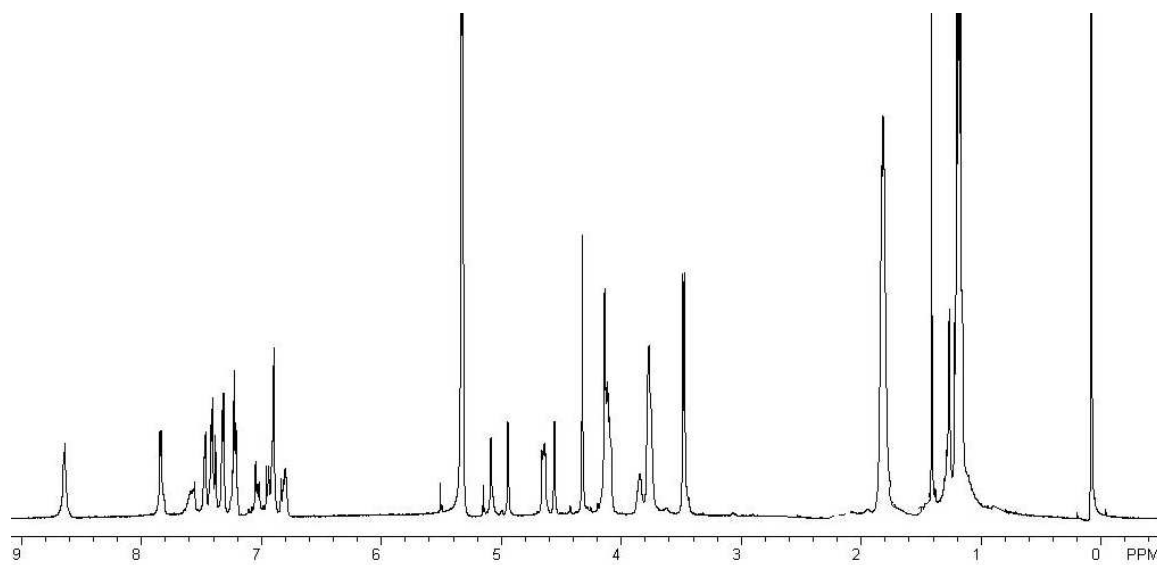

B.

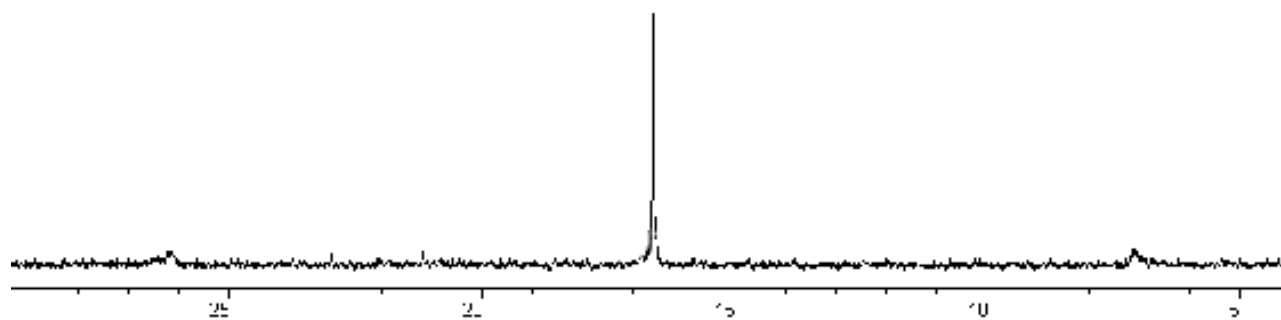

Figure S5. ESI-MS of **8**:

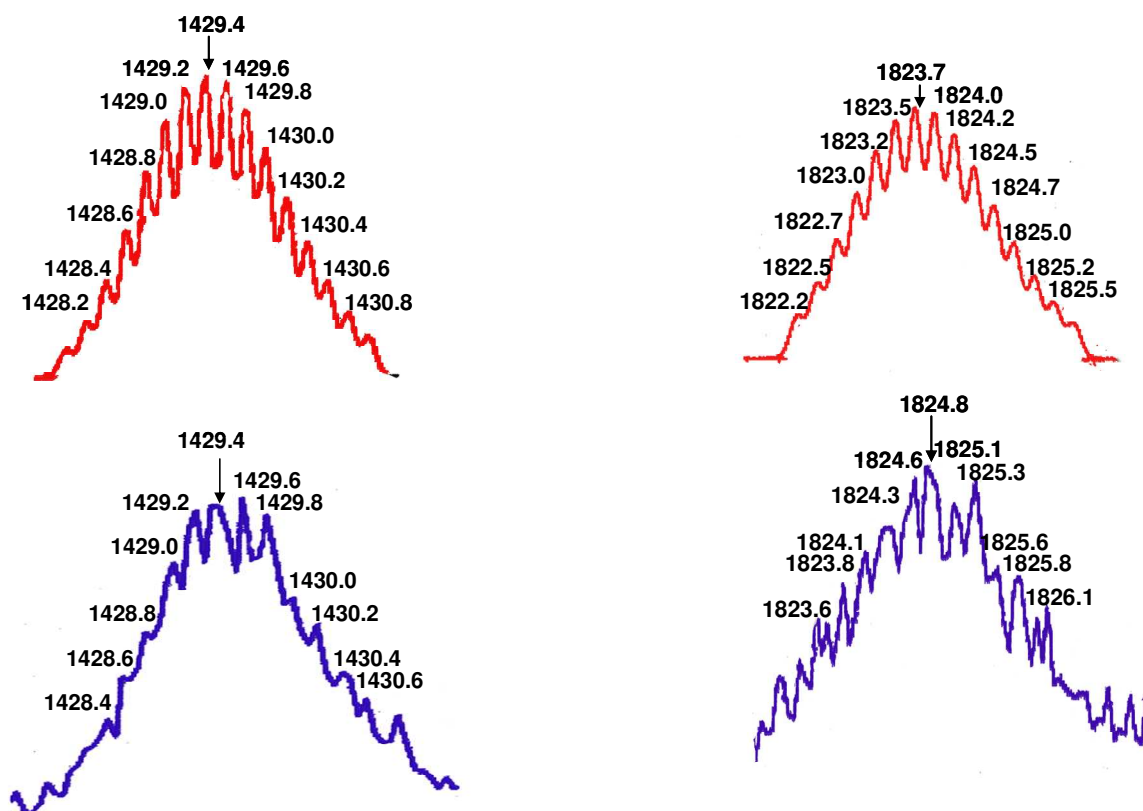

Calculated (top) and experimental (bottom) ESI-MS spectra of **8**.

Figure S6. ESI-MS of **9**:

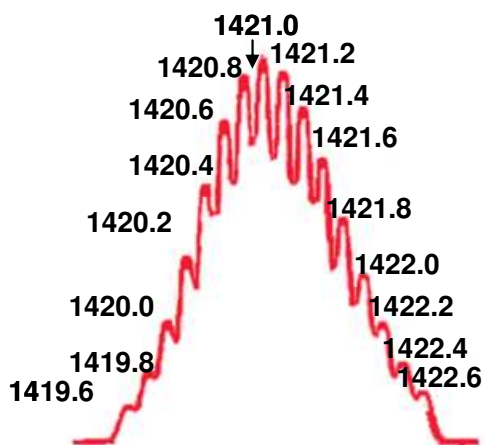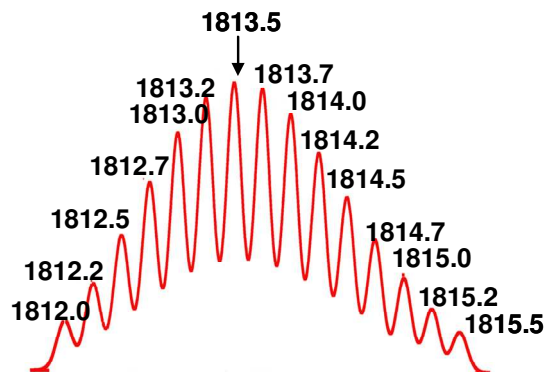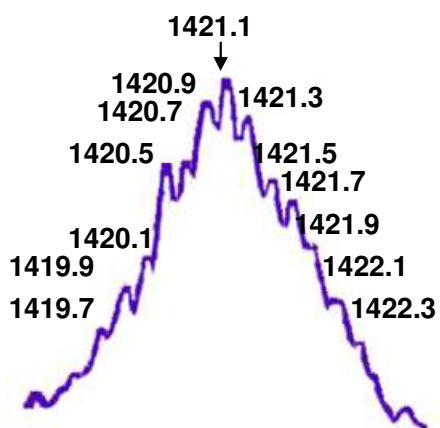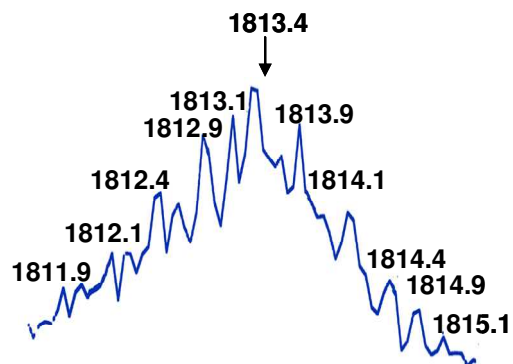

A.  $[M-5OTf]^{5+}$

B.  $[M-4OTf]^{4+}$

Calculated (top) and experimental (bottom) ESI-MS spectra of **9**.



**Figure S7.**  $^1\text{H}$ - $^1\text{H}$  COSY and NOESY NMR spectra of **8**.

A. gDQCOSY of **8**:

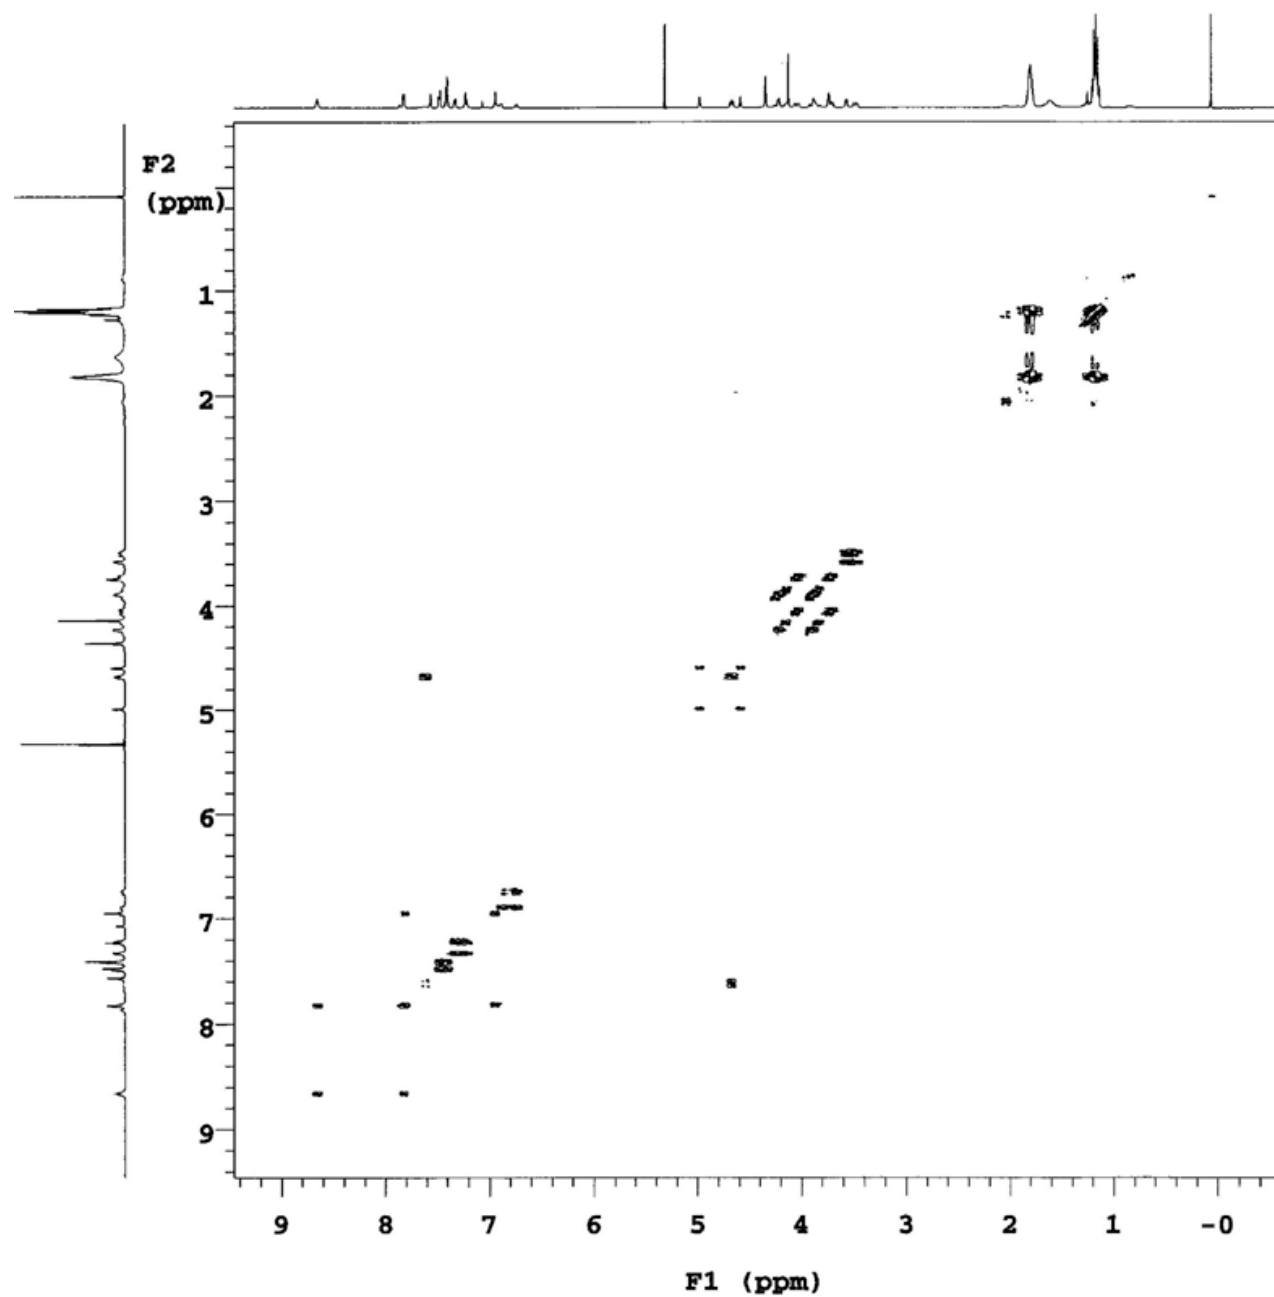

B. NOESY of 8:

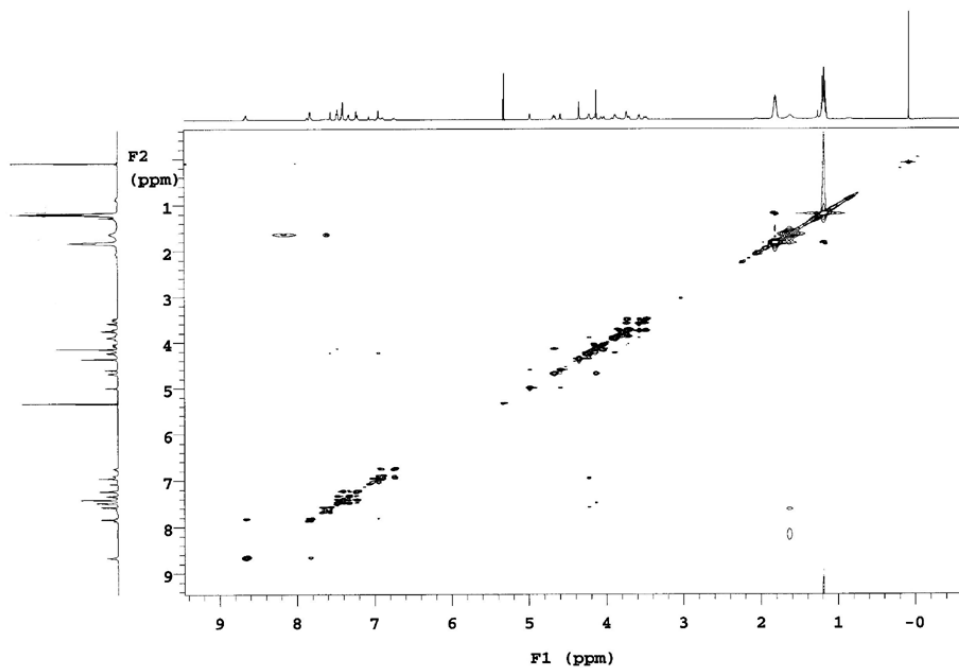

C. Expanded NOESY of 8:

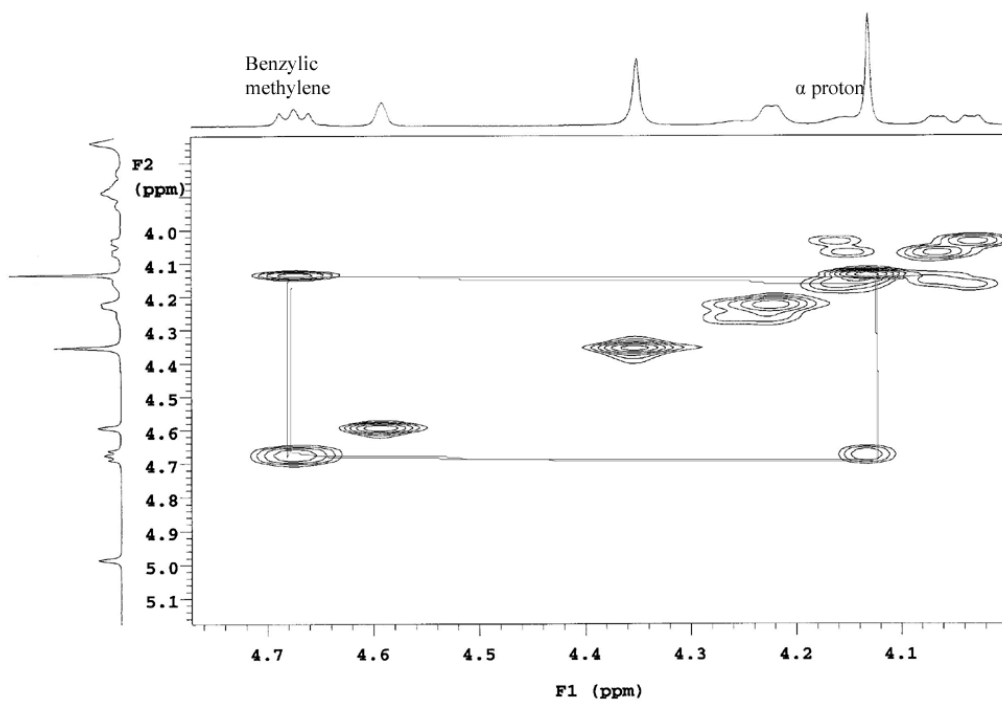

**Figure S8.**  $^1\text{H}$ - $^1\text{H}$  COSY and NOESY NMR spectra of **9**.

A. gDQCOSY of **9** :

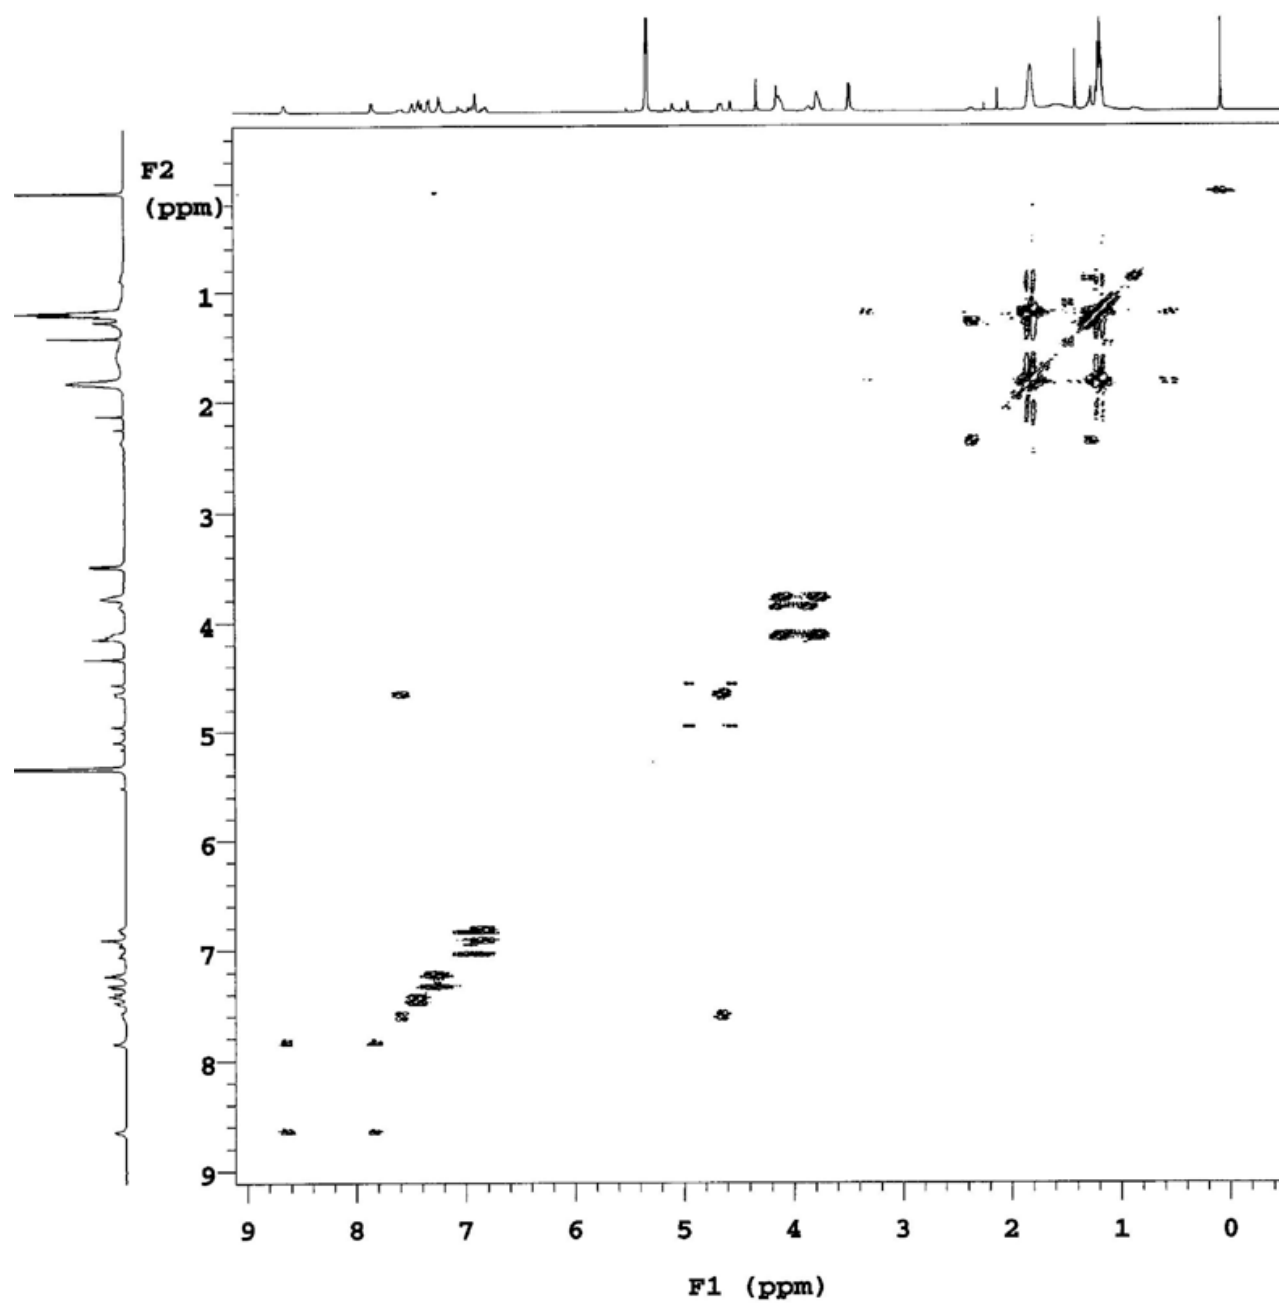

B. NOESY of 9:

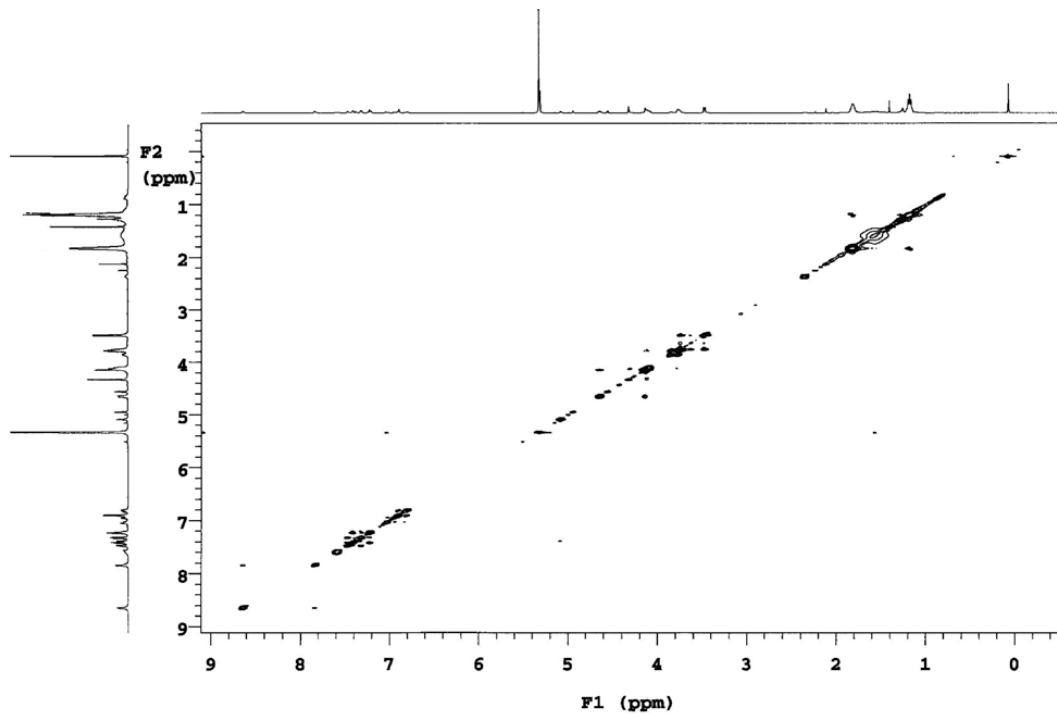

C. Expanded NOESY of 9

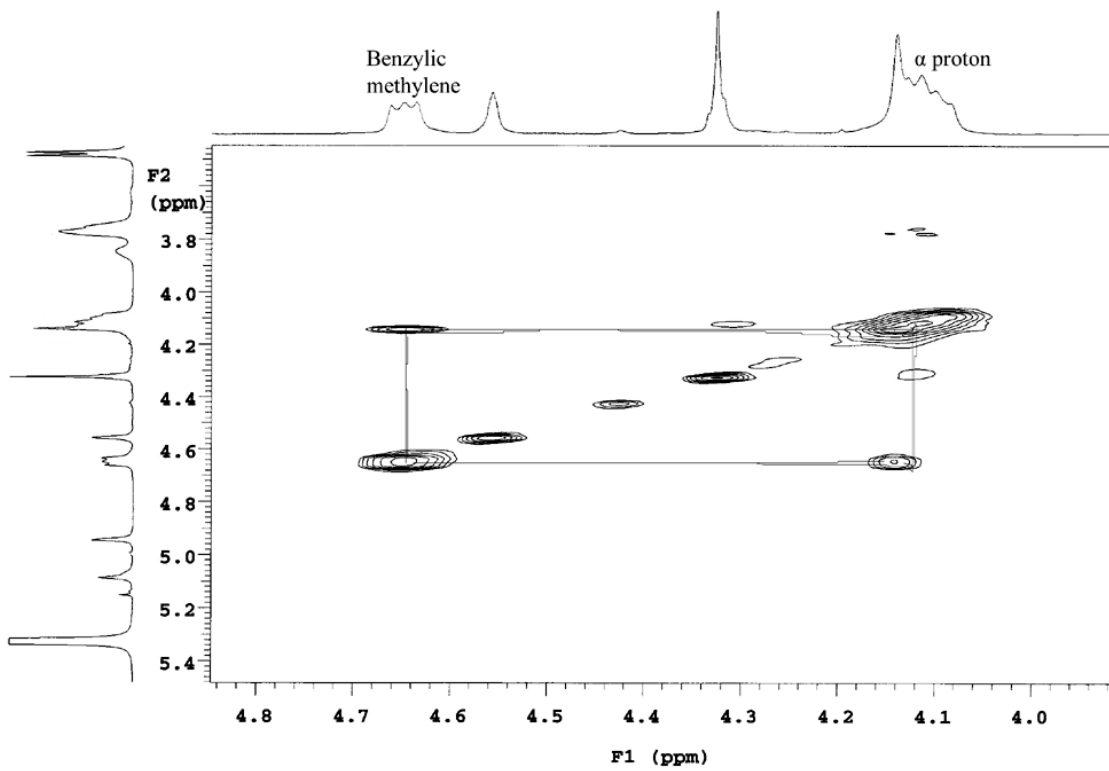

**Figure S9:** Experimental Data for  $^1\text{H}$  NMR Titration Experiments**A. NMR Titration Data for 8:**

|    | $\delta$         | $[\delta - \delta_0]$<br>PPM | $[\delta - \delta_0]$ Hz | Guest:Host | V/mL  | [Guest] $\times 10^{-3}$ M |
|----|------------------|------------------------------|--------------------------|------------|-------|----------------------------|
| 0  | $\delta_0=3.767$ | 0                            | 0                        | 0:1        | 0     | 0                          |
| 1  | 3.7571           | -0.0099                      | -4.95                    | 0.181:1    | 0.759 | 0.13086                    |
| 2  | 3.75477          | -0.01223                     | -6.115                   | 0.3598:1   | 0.768 | 0.25866                    |
| 3  | 3.7448           | -0.0222                      | -11.1                    | 0.5306:1   | 0.777 | 0.38349                    |
| 4  | 3.7419           | -0.0251                      | -12.55                   | 0.6993:1   | 0.786 | 0.50547                    |
| 5  | 3.7332           | -0.03377                     | -16.885                  | 0.8642:1   | 0.795 | 0.62468                    |
| 6  | 3.7295           | -0.0375                      | -18.750                  | 1.0258:1   | 0.804 | 0.74122                    |
| 7  | 3.7235           | -0.0435                      | -21.75                   | 1.1832:1   | 0.813 | 0.85519                    |
| 8  | 3.7169           | -0.0501                      | -25.05                   | 1.3374:1   | 0.822 | 0.96666                    |
| 9  | 3.7159           | -0.0511                      | -25.55                   | 1.4883:1   | 0.831 | 1.0757                     |
| 10 | 3.7088           | -0.0582                      | -29.10                   | 1.6359:1   | 0.84  | 1.18243                    |
| 11 | 3.7028           | -0.0642                      | -32.1                    | 1.7804:1   | 0.849 | 1.28688                    |
| 12 | 3.6984           | -0.0686                      | -34.3                    | 1.9219:1   | 0.858 | 1.38915                    |
| 13 | 3.69115          | -0.7585                      | -37.925                  | 2.0604:1   | 0.867 | 1.48929                    |
| 14 | 3.6882           | -0.0788                      | -39.4                    | 2.1961:1   | 0.876 | 1.58737                    |
| 15 | 3.6842           | -0.0828                      | -41.4                    | 2.3291:1   | 0.885 | 1.68346                    |
| 16 | 3.6807           | -0.0863                      | -43.15                   | 2.4593:1   | 0.894 | 1.77761                    |
| 17 | 3.6781           | -0.0889                      | -44.45                   | 2.5870:1   | 0.903 | 1.86989                    |
| 18 | 3.6727           | -0.0943                      | -47.15                   | 2.7122:1   | 0.912 | 1.96034                    |
| 19 | 3.6707           | -0.0963                      | -48.15                   | 2.8344:1   | 0.921 | 2.04903                    |
| 20 | 3.6662           | -0.1008                      | -50.39                   | 2.9552:1   | 0.930 | 2.136                      |
| 21 | 3.6647           | -0.1023                      | -51.15                   | 3.0732:1   | 0.939 | 2.213                      |
| 22 | 3.6581           | -0.1089                      | -54.45                   | 3.3275:1   | 0.959 | 2.40513                    |
| 23 | 3.6552           | -0.1118                      | -55.90                   | 3.5715:1   | 0.979 | 2.58145                    |
| 24 | 3.6507           | -0.1163                      | -58.15                   | 3.8056:1   | 0.999 | 2.75071                    |
| 25 | 3.6479           | -0.1191                      | -59.55                   | 4.0306:1   | 1.019 | 2.91333                    |
| 26 | 3.6430           | -0.124                       | -62.0                    | 4.4551:1   | 1.059 | 3.22014                    |
| 27 | 3.6399           | -0.1271                      | -63.55                   | 4.8487:1   | 1.099 | 3.50461                    |
| 28 | 3.6363           | -0.1307                      | -65.35                   | 5.2146:1   | 1.139 | 3.76910                    |
| 29 | 3.6289           | -0.1381                      | -69.05                   | 5.7177:1   | 1.199 | 4.13275                    |
| 30 | 3.6274           | -0.1396                      | -69.80                   | 6.1728:1   | 1.259 | 4.46173                    |
| 31 | 3.6195           | -0.1475                      | -73.75                   | 6.5866:1   | 1.319 | 4.76079                    |

[Host] =  $7.228 \times 10^{-4}$ M  
0.75ml solvent

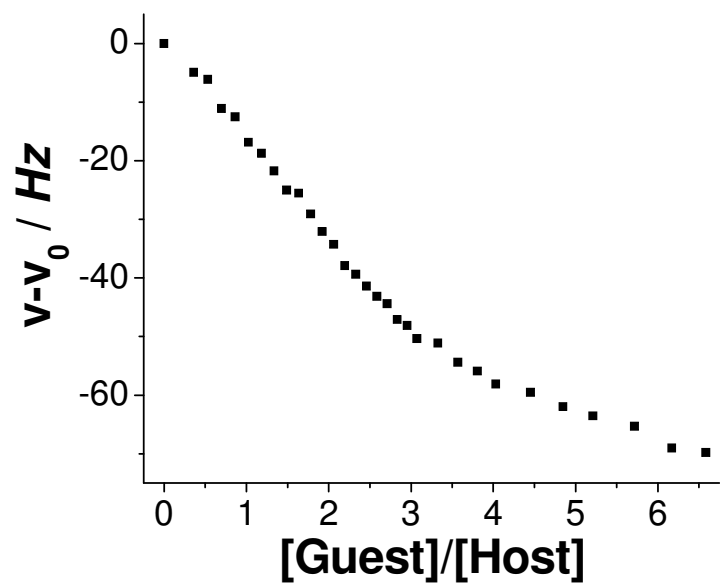

The calculation of  $K_s$ :

$$K_{s,1} = (2.45 \pm 0.44) \times 10^3 \text{ M}^{-1}$$

$$K_{s,2} = (1.66 \pm 0.19) \times 10^3 \text{ M}^{-1}$$

$$K_{s,3} = (4.02 \pm 0.19) \times 10^2 \text{ M}^{-1}$$

B. <sup>1</sup>H NMR Titration Experiment for **9**:

|    | $\delta$         | $[\delta - \delta_0]$<br>PPM | $[\delta - \delta_0]$<br>Hz | Guest:Host | V/mL | [Guest]X10 <sup>-3</sup> M |
|----|------------------|------------------------------|-----------------------------|------------|------|----------------------------|
| 0  | $\delta_0=3.755$ | 0                            | 0                           | 0:1        | 0    | 0                          |
| 1  | 3.7382           | -0.0168                      | -8.40                       | 0.1970:1   | 0.76 | 0.1423                     |
| 2  | 3.7231           | -0.0319                      | -15.95                      | 0.3888:1   | 0.77 | 0.2808                     |
| 3  | 3.7024           | -0.0526                      | -26.30                      | 0.5757:1   | 0.78 | 0.4158                     |
| 4  | 3.68495          | -0.07005                     | -35.025                     | 0.7579:1   | 0.79 | 0.5474                     |
| 5  | 3.6711           | -0.0839                      | -41.95                      | 0.9356:1   | 0.80 | 0.67575                    |
| 6  | 3.6616           | -0.09345                     | -46.725                     | 1.1088:1   | 0.81 | 0.80089                    |
| 7  | 3.6499           | -0.1051                      | -52.55                      | 1.2778:1   | 0.82 | 0.92298                    |
| 8  | 3.6373           | -0.1171                      | -58.85                      | 1.4428:1   | 0.83 | 1.04212                    |
| 9  | 3.6277           | -0.1273                      | -63.65                      | 1.6038:1   | 0.84 | 1.15843                    |
| 10 | 3.6211           | -0.1339                      | -66.95                      | 1.7610:1   | 0.85 | 1.272                      |
| 11 | 3.6119           | -0.14309                     | -71.55                      | 1.9146:1   | 0.86 | 1.38293                    |
| 12 | 3.6075           | -0.1455                      | -72.75                      | 2.0647:1   | 0.87 | 1.49131                    |
| 13 | 3.6029           | -0.15215                     | -76.075                     | 2.2113:1   | 0.88 | 1.59723                    |
| 14 | 3.5980           | -0.15702                     | -78.51                      | 2.3547:1   | 0.89 | 1.70076                    |
| 15 | 3.5942           | -0.1608                      | -80.4                       | 2.4948:1   | 0.90 | 1.802                      |
| 16 | 3.5914           | -0.1636                      | -81.8                       | 2.6319:1   | 0.91 | 1.90101                    |
| 17 | 3.5871           | -0.1679                      | -83.95                      | 2.7660:1   | 0.92 | 1.9979                     |
| 18 | 3.5842           | -0.1708                      | -85.4                       | 2.8972:1   | 0.93 | 2.09265                    |
| 19 | 3.5823           | -0.1727                      | -86.35                      | 3.0256:1   | 0.94 | 2.1854                     |
| 20 | 3.5776           | -0.1774                      | -88.7                       | 3.2744:1   | 0.96 | 2.36513                    |
| 21 | 3.5732           | -0.1818                      | -90.9                       | 3.5131:1   | 0.98 | 2.53751                    |
| 22 | 3.5695           | -0.1855                      | -92.75                      | 3.7422:1   | 1.00 | 2.703                      |
| 23 | 3.5682           | -0.1868                      | -93.4                       | 3.9623:1   | 1.02 | 2.8620                     |
| 24 | 3.5665           | -0.1885                      | -94.25                      | 4.1740:1   | 1.04 | 3.01488                    |
| 25 | 3.5654           | -0.1896                      | -94.8                       | 4.6692:1   | 1.09 | 3.37255                    |
| 26 | 3.5515           | -0.2035                      | -101.75                     | 5.1209:1   | 1.14 | 3.69884                    |
| 27 | 3.5489           | -0.2061                      | -103.05                     | 5.5347:1   | 1.19 | 3.99771                    |
| 28 | 3.5468           | -0.2082                      | -104.1                      | 5.9151:1   | 1.24 | 4.27248                    |
| 29 | 3.5422           | -0.2128                      | -106.4                      | 6.2660:1   | 1.29 | 4.5295                     |
| 30 | 3.5396           | -0.2154                      | -107.7                      | 6.5908:1   | 1.34 | 4.76051                    |

[Host] = 7.2230 X 10<sup>-4</sup> M  
0.75ml solvent

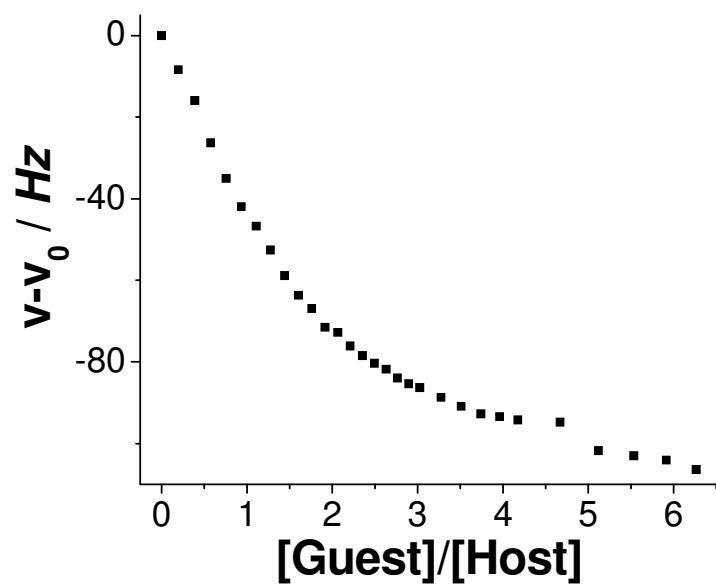

The calculation of  $Ks$ :

$$Ks_{.1} = (2.09 \pm 0.33) \times 10^4 \text{ M}^{-1}$$

$$Ks_{.2} = (1.83 \pm 0.06) \times 10^3 \text{ M}^{-1}$$

$$Ks_{.3} = (7.83 \pm 0.40) \times 10^1 \text{ M}^{-1}$$



**Electrochemical Measurements:** Cyclic voltammetry (CV) was performed in a Faraday cage using a 3-electrode cell and a potentiostat. The working electrode was a platinum disk embedded in glass with surface area of about  $1 \text{ mm}^2$ . A Ag/AgCl electrode (Ag/AgCl wire soaked in 3M KCl solution) was used as reference electrode and a Pt wire as the counter. Voltammetric data were recorded using in-house virtual instrumentation. The CV measurements were carried out in a dichloromethane solution containing 0.1 M tetra-*n*-butylammonium hexafluorophosphate (TBAPF<sub>6</sub>,  $n\text{-Bu}_4\text{N}^+\text{PF}_6^-$ ) as the supporting electrolyte.

Steady-state voltammetric measurements were made using a two-electrode compartment with a micro-sized Pt disk (the diameter of  $25 \mu\text{m}$ ) as the working electrode and a Ag/AgCl electrode as the counter and reference. Potentiostat were used for potential generation and current measurement. The size of this micro-Pt disk was re-examined by steady-state voltammetric measurement using an acetonitrile solution containing 5.0 mM ferrocene and 0.1M TBAPF<sub>6</sub>.

Figure S10: Electrochemical Measurements of 5 (Solution: 0.2mM 5+0.1M *n*-Bu<sub>4</sub>NPF<sub>6</sub> in CH<sub>2</sub>Cl<sub>2</sub>):

**A. Cyclic voltammetries at disk Pt electrode with  $1 \text{ mm}^2$  surface area.**

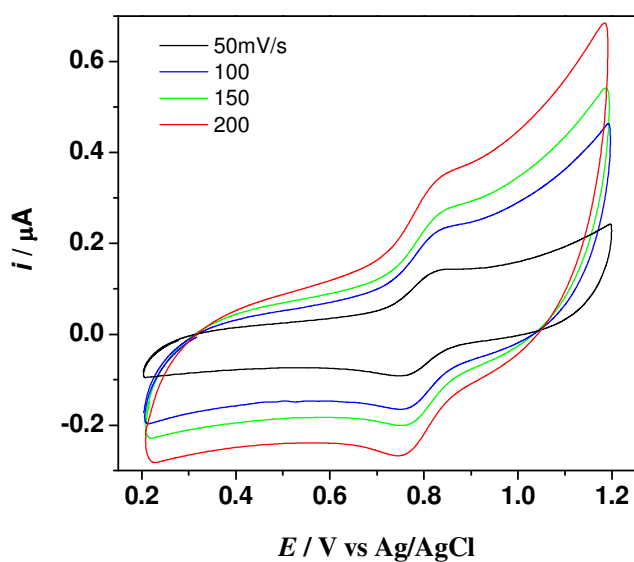

**B. Steady State Measurement using Microelectrode of 25  $\mu\text{m}$  diameter.**

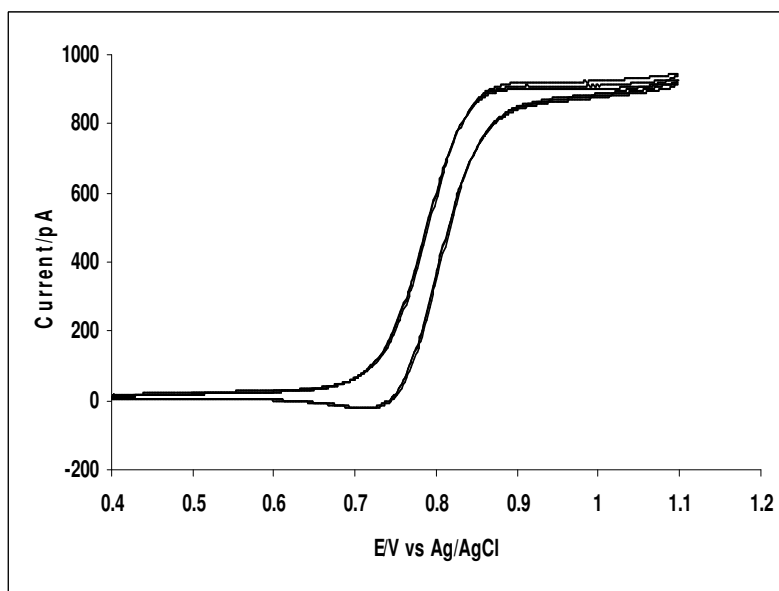

**B. E- $\log[(i_{\text{lim}}-i)/i]$  plot derived from the steady state measurement as obtained at micro electrode.**

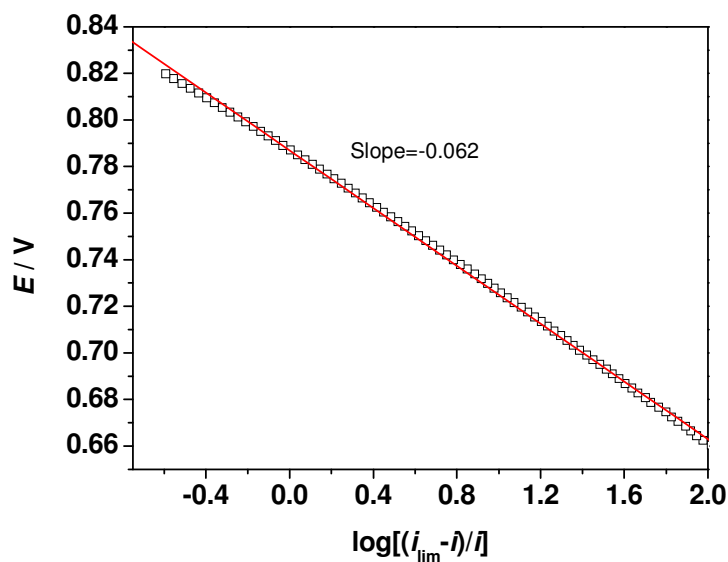

The slope (-0.062) is very close to -0.059, a theoretical value for one-electron-transfer reaction per redox molecule, indicating that one electron is transferred from each ferrocene group attached during its oxidation.

Figure S11: Electrochemical Measurements of 6 (Solution: 0.2mM 6+0.1M *n*-Bu<sub>4</sub>NPF<sub>6</sub> in CH<sub>2</sub>Cl<sub>2</sub>):

**A. Cyclic voltammograms at disk Pt electrode with 1mm<sup>2</sup> surface area**

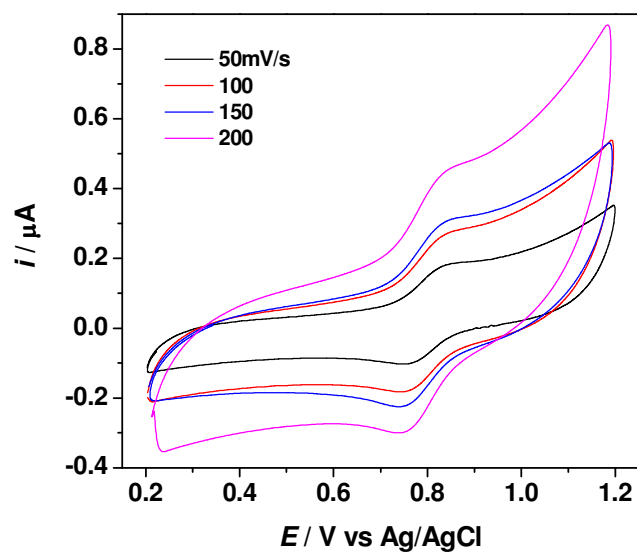

**B. Steady State Measurement using 25  $\mu\text{m}$  electrode**

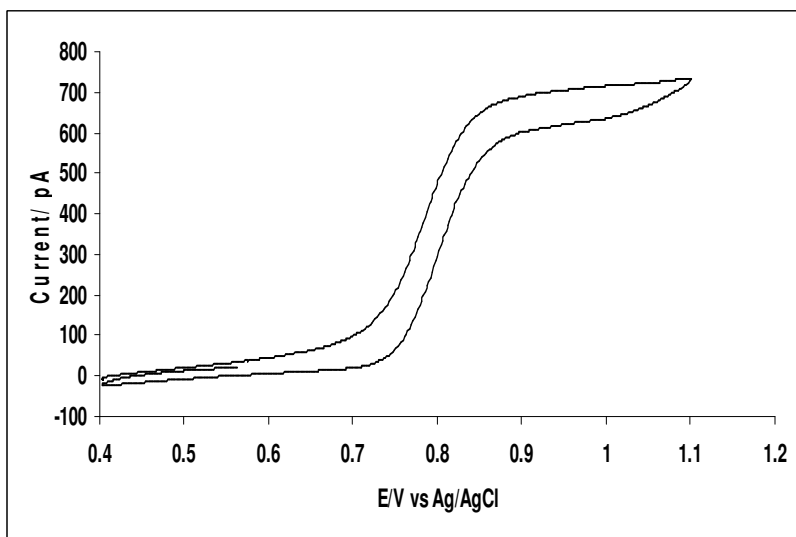

C. E-log[( $i_{lim}-i$ )/ $i$ ] plot derived from the steady state measurement as obtained at micro electrode.

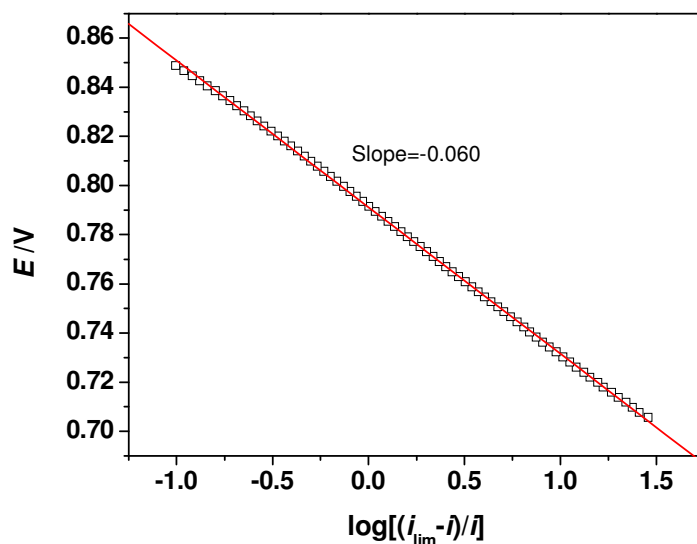

The slope (-0.060) is very close to -0.059, a theoretical value for one-electron-transfer reaction per redox molecule, indicating that one electron is transferred from each ferrocene group attached during its oxidation.

**Figure S12: Electrochemical Measurements of 8 (Solution: 0.2mM 8+0.1M  $n$ -Bu<sub>4</sub>NPF<sub>6</sub> in CH<sub>2</sub>Cl<sub>2</sub>):**

**Cyclic voltammograms at disk Pt electrode with 1mm<sup>2</sup> surface area**

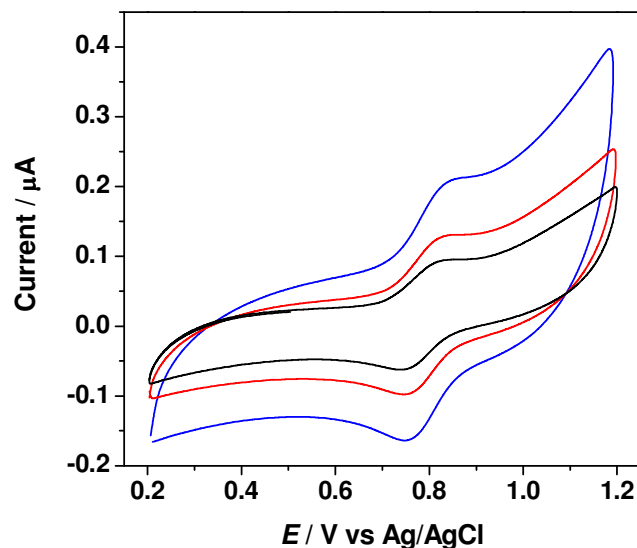

Figure S13: Electrochemical Measurements of **9** (Solution: 0.2mM **9**+0.1M *n*-Bu<sub>4</sub>NPF<sub>6</sub> in CH<sub>2</sub>Cl<sub>2</sub>):

Cyclic voltammtries at disk Pt electrode with 1mm<sup>2</sup> surface area

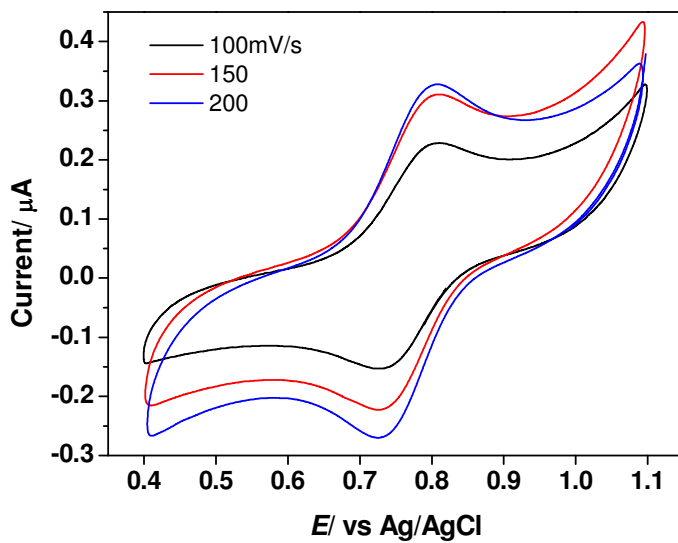

### Computational Procedures and Calculated Models for **5** and **8**:

The molecular structures of hexagonal tris-**DB24C8** hosts **5**, **6** as well as tris[2]pseudorotaxanes **8** and **9** were each constructed within the input mode of the program<sup>4</sup> Maestro v8.0.110 with the OPLS force-field. A 1.0 ns molecular dynamics simulation (0.05 fs timestep) at a simulation temperature of 300 K was used to equilibrate each structure. Following each molecular dynamics simulation a full energy minimization was used to obtain the final optimized structures.

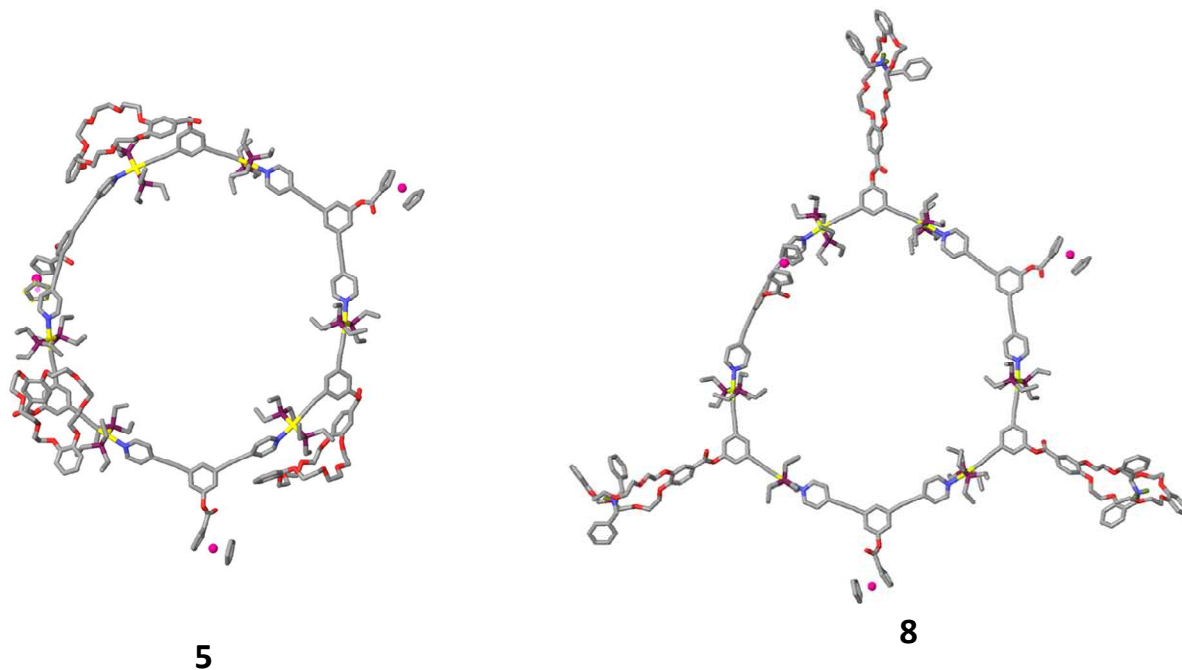

Color scheme: C = gray, O = red, N = blue, P = purple, Pt = yellow, and  $R_2NH_2^+$  hydrogen atoms = green, Fe = purple all other hydrogen atoms have been removed for clarity.

## Molecular Modeling Atom Coordinates:

5:

|   |          |          |           |
|---|----------|----------|-----------|
| C | 41.64400 | 16.99610 | -17.02060 |
| C | 41.95790 | 17.46540 | -18.31590 |
| C | 42.38690 | 18.79000 | -18.52650 |
| C | 42.44000 | 19.68450 | -17.44110 |
| C | 42.18830 | 19.27290 | -16.12410 |
| C | 41.77680 | 17.91040 | -15.91390 |
| C | 42.43330 | 20.32030 | -15.09320 |
| C | 41.24150 | 15.56470 | -16.92110 |
| C | 40.97020 | 14.36010 | -17.00320 |
| C | 42.73080 | 21.32670 | -14.43570 |
| C | 43.23590 | 22.93430 | -13.28150 |
| C | 40.62770 | 12.34830 | -16.97430 |
| C | 44.78380 | 20.44150 | -19.59210 |
| C | 46.12420 | 20.39280 | -19.15350 |
| C | 46.70540 | 21.50610 | -18.51550 |
| C | 44.07760 | 21.66220 | -19.49440 |
| C | 44.63990 | 22.76810 | -18.83110 |
| C | 45.95110 | 22.68460 | -18.30300 |
| O | 43.84880 | 23.87620 | -18.65130 |
| C | 44.35180 | 25.06920 | -19.25550 |
| C | 43.22070 | 26.09210 | -19.41730 |
| O | 42.86310 | 26.66700 | -18.15970 |
| C | 41.86950 | 27.67640 | -18.34030 |
| C | 41.50250 | 28.35920 | -17.01410 |
| O | 40.74420 | 27.47560 | -16.18050 |
| O | 46.41320 | 23.72800 | -17.53520 |
| C | 47.81380 | 23.97970 | -17.54590 |
| C | 48.04620 | 25.44100 | -17.14810 |
| O | 47.69040 | 25.66090 | -15.78190 |
| C | 47.97310 | 27.00760 | -15.41150 |
| C | 47.72130 | 27.20660 | -13.90800 |
| O | 46.33380 | 27.27520 | -13.57220 |
| C | 45.69530 | 28.48390 | -13.99510 |
| C | 44.83740 | 29.02490 | -12.84340 |
| O | 43.76860 | 28.11630 | -12.58910 |
| C | 39.85370 | 28.14680 | -15.29430 |
| C | 40.59310 | 28.80670 | -14.12130 |
| O | 41.12790 | 27.81010 | -13.24300 |
| C | 42.81640 | 28.54110 | -11.69410 |
| C | 41.45900 | 28.33230 | -12.01880 |
| C | 43.15030 | 29.14200 | -10.45800 |
| C | 42.13920 | 29.50620 | -9.54850  |
| C | 40.78860 | 29.27420 | -9.86680  |
| C | 40.44920 | 28.68760 | -11.09960 |
| P | 42.15560 | 24.16400 | -14.34880 |
| P | 44.36090 | 21.73260 | -12.28650 |
| C | 43.30550 | 20.40750 | -11.43770 |
| C | 42.37650 | 21.01300 | -10.37330 |
| C | 45.57890 | 20.85780 | -13.45120 |
| C | 46.36710 | 21.86440 | -14.30750 |
| C | 45.46340 | 22.44870 | -10.90880 |
| C | 46.23440 | 21.35890 | -10.14450 |
| C | 40.66120 | 24.75050 | -13.36000 |

|    |          |          |           |
|----|----------|----------|-----------|
| C  | 39.76800 | 23.58120 | -12.91700 |
| C  | 43.21330 | 25.62180 | -14.85850 |
| C  | 44.49560 | 25.17470 | -15.56390 |
| C  | 41.44190 | 23.40630 | -15.95030 |
| C  | 40.60190 | 24.39380 | -16.76580 |
| P  | 39.02860 | 12.70480 | -15.94620 |
| C  | 39.49460 | 13.47490 | -14.28170 |
| C  | 40.31960 | 12.51200 | -13.41270 |
| C  | 37.91480 | 13.92490 | -16.87020 |
| C  | 37.54340 | 13.39920 | -18.26650 |
| C  | 37.90850 | 11.22270 | -15.53830 |
| C  | 36.69650 | 11.63360 | -14.68600 |
| P  | 42.19640 | 11.99570 | -18.08690 |
| C  | 43.63160 | 11.41020 | -17.01260 |
| C  | 43.98290 | 12.43300 | -15.92080 |
| C  | 41.86700 | 10.67350 | -19.39600 |
| C  | 40.75940 | 11.10670 | -20.37280 |
| C  | 42.83930 | 13.49090 | -19.07630 |
| C  | 43.96130 | 13.10970 | -20.05700 |
| C  | 44.10390 | 19.18460 | -20.02480 |
| C  | 37.95510 | -1.91400 | -18.80360 |
| C  | 37.04290 | -0.86570 | -18.47350 |
| C  | 35.70770 | -1.26660 | -18.79220 |
| C  | 35.77900 | -2.63520 | -19.22070 |
| C  | 37.16250 | -3.02850 | -19.24000 |
| H  | 37.53430 | -4.04090 | -19.43720 |
| C  | 38.14510 | -1.20480 | -22.20330 |
| C  | 38.14010 | -0.00980 | -21.41590 |
| C  | 36.80300 | 0.50070  | -21.39360 |
| C  | 35.98120 | -0.37670 | -22.17050 |
| C  | 36.81150 | -1.42900 | -22.67400 |
| H  | 36.50860 | -2.19090 | -23.40240 |
| Fe | 36.83330 | -1.44960 | -20.58010 |
| C  | 37.37090 | 0.39630  | -17.69160 |
| O  | 36.66850 | 1.39650  | -17.77630 |
| O  | 38.47150 | 0.27110  | -16.90720 |
| C  | 38.75670 | 1.17530  | -15.89810 |
| C  | 38.88780 | 0.67850  | -14.58190 |
| C  | 38.97250 | 2.55690  | -16.13540 |
| C  | 39.29390 | 3.44390  | -15.07890 |
| C  | 39.20790 | 1.52440  | -13.49620 |
| C  | 39.40780 | 2.91400  | -13.75690 |
| C  | 39.32070 | 0.91960  | -12.14720 |
| C  | 39.38660 | 0.31830  | -11.07320 |
| C  | 39.50420 | 4.87840  | -15.39290 |
| C  | 39.67120 | 6.04950  | -15.74040 |
| C  | 39.46030 | -0.37350 | -9.76730  |
| C  | 39.90490 | 7.45830  | -16.13010 |
| C  | 39.43380 | 0.37710  | -8.57450  |
| C  | 39.56580 | -1.78430 | -9.63920  |
| C  | 39.66590 | -2.39320 | -8.35160  |
| C  | 39.53930 | -0.27530 | -7.32340  |
| C  | 40.78970 | 8.26110  | -15.38120 |
| C  | 40.97880 | 9.62210  | -15.72390 |
| N  | 40.33350 | 10.20650 | -16.77500 |
| C  | 39.26350 | 8.07170  | -17.23770 |
| C  | 39.49420 | 9.44680  | -17.54230 |
| C  | 46.58540 | 34.86690 | -5.50000  |
| C  | 47.46480 | 33.95200 | -6.15560  |



|    |          |          |           |
|----|----------|----------|-----------|
| C  | 48.74160 | 34.56490 | -6.35380  |
| C  | 48.69040 | 35.84470 | -5.70470  |
| C  | 47.36030 | 36.03520 | -5.19140  |
| C  | 45.70470 | 36.65360 | -8.34990  |
| C  | 45.77800 | 35.24840 | -8.61020  |
| C  | 47.05670 | 34.97130 | -9.19070  |
| C  | 47.77330 | 36.20600 | -9.29310  |
| C  | 46.93600 | 37.24660 | -8.77690  |
| H  | 47.14580 | 38.32180 | -8.82800  |
| Fe | 47.31580 | 35.83400 | -7.27820  |
| C  | 47.19900 | 32.47670 | -6.40940  |
| O  | 47.79560 | 31.86540 | -7.28770  |
| O  | 46.28120 | 31.94350 | -5.56390  |
| C  | 46.13670 | 30.57500 | -5.41090  |
| C  | 45.78180 | 29.70950 | -6.47700  |
| C  | 46.29960 | 30.03410 | -4.11610  |
| C  | 46.13960 | 28.65360 | -3.86050  |
| C  | 45.61150 | 28.31850 | -6.27020  |
| C  | 45.79580 | 27.79890 | -4.95180  |
| C  | 45.24180 | 27.46910 | -7.42870  |
| C  | 44.92200 | 26.84770 | -8.44440  |
| C  | 46.33230 | 28.17530 | -2.47020  |
| C  | 46.50970 | 27.89870 | -1.28200  |
| C  | 44.49300 | 26.11570 | -9.65760  |
| C  | 46.69840 | 27.57510 | 0.14970   |
| C  | 43.24050 | 25.46590 | -9.70130  |
| C  | 45.29980 | 26.02140 | -10.81910 |
| C  | 44.87450 | 25.24720 | -11.93790 |
| C  | 42.87570 | 24.69610 | -10.83560 |
| N  | 43.69600 | 24.56210 | -11.91980 |
| C  | 47.76640 | 28.10410 | 0.92010   |
| C  | 47.95050 | 27.70350 | 2.27630   |
| N  | 47.11290 | 26.79260 | 2.85630   |
| C  | 45.80840 | 26.69800 | 0.80630   |
| C  | 46.03900 | 26.32760 | 2.15470   |
| N  | 39.66860 | -1.62940 | -7.21800  |
| C  | 40.41810 | -3.35910 | -0.57630  |
| C  | 39.62710 | -4.44750 | -0.14480  |
| C  | 39.54410 | -4.79020 | 1.21950   |
| C  | 40.32540 | -4.09090 | 2.15930   |
| C  | 41.07310 | -2.95930 | 1.80480   |
| C  | 41.12910 | -2.59680 | 0.41600   |
| C  | 41.66640 | -2.21720 | 2.94850   |
| C  | 40.39610 | -3.05790 | -2.03310  |
| C  | 40.24060 | -2.88860 | -3.24770  |
| C  | 42.01080 | -1.69570 | 4.01730   |
| C  | 42.55000 | -0.71980 | 5.72710   |
| C  | 39.95190 | -2.36400 | -5.19720  |
| C  | 37.45300 | -4.84600 | 3.44390   |
| C  | 36.62920 | -3.75400 | 3.79390   |
| C  | 36.80940 | -3.09370 | 5.02560   |
| C  | 38.36490 | -5.35200 | 4.39830   |
| C  | 38.58800 | -4.65910 | 5.60780   |
| C  | 37.82700 | -3.51240 | 5.91270   |
| O  | 39.58710 | -5.01870 | 6.47740   |
| C  | 39.70640 | -6.41030 | 6.75640   |
| C  | 40.36520 | -6.59490 | 8.12940   |
| O  | 41.73420 | -6.18710 | 8.07310   |
| C  | 42.53410 | -6.77330 | 9.10390   |

|   |          |          |          |
|---|----------|----------|----------|
| C | 42.37660 | -6.05690 | 10.46280 |
| O | 43.17020 | -4.87290 | 10.54790 |
| O | 38.14160 | -2.82010 | 7.05760  |
| C | 37.03950 | -2.35130 | 7.82760  |
| C | 37.48190 | -2.19720 | 9.28690  |
| O | 38.42550 | -1.13380 | 9.41900  |
| C | 38.67410 | -0.85860 | 10.79610 |
| C | 39.68380 | 0.28960  | 10.91580 |
| O | 41.01060 | -0.17960 | 10.67770 |
| C | 41.70750 | -0.46050 | 11.89410 |
| C | 43.03860 | -1.16120 | 11.60080 |
| O | 43.80150 | -0.36180 | 10.69390 |
| C | 44.55020 | -5.12650 | 10.80280 |
| C | 45.23530 | -3.83830 | 11.27000 |
| O | 45.16010 | -2.82080 | 10.26460 |
| C | 45.16310 | -0.46990 | 10.83560 |
| C | 45.85200 | -1.68660 | 10.60650 |
| C | 45.88690 | 0.68430  | 11.19640 |
| C | 47.28810 | 0.64010  | 11.31880 |
| C | 47.97520 | -0.56150 | 11.07000 |
| C | 47.25990 | -1.71910 | 10.71210 |
| P | 43.26670 | -2.38290 | 6.49030  |
| P | 41.76120 | 0.89760  | 4.97730  |
| C | 42.83980 | 2.44260  | 5.19720  |
| C | 44.17390 | 2.32760  | 4.43700  |
| C | 41.39800 | 0.94580  | 3.09440  |
| C | 40.94910 | 2.33090  | 2.59340  |
| C | 40.08960 | 1.24500  | 5.78230  |
| C | 39.14230 | 0.04400  | 5.64240  |
| C | 45.15860 | -2.34700 | 6.58440  |
| C | 45.74070 | -3.66600 | 7.12050  |
| C | 42.65220 | -2.55190 | 8.24220  |
| C | 41.12620 | -2.53530 | 8.35960  |
| C | 42.78480 | -4.02380 | 5.64550  |
| C | 43.63680 | -4.42070 | 4.41810  |
| P | 38.01290 | -2.46460 | -4.99990 |
| C | 37.42930 | -3.79350 | -3.77510 |
| C | 37.87710 | -5.20760 | -4.18660 |
| C | 37.35320 | -0.79950 | -4.40100 |
| C | 37.98200 | -0.34650 | -3.07420 |
| C | 37.08590 | -2.86270 | -6.60930 |
| C | 35.58610 | -3.09900 | -6.36740 |
| P | 41.87300 | -2.34790 | -5.42480 |
| C | 42.60570 | -4.01990 | -4.93000 |
| C | 42.03080 | -5.16010 | -5.78620 |
| C | 42.53890 | -1.99930 | -7.17170 |
| C | 44.07590 | -1.98390 | -7.20700 |
| C | 42.62300 | -1.01750 | -4.30820 |
| C | 42.10160 | 0.38530  | -4.65940 |
| O | 38.68120 | -5.77060 | 1.64670  |
| C | 37.45140 | -5.34890 | 2.03750  |
| C | 44.87490 | 7.31930  | 11.17200 |
| C | 45.49370 | 6.08760  | 10.78780 |
| C | 45.67340 | 8.40950  | 11.63020 |
| C | 47.06290 | 8.24670  | 11.70650 |
| C | 46.90410 | 5.97690  | 10.85910 |
| C | 47.69310 | 7.06200  | 11.29250 |
| C | 44.75050 | 4.92300  | 10.26580 |
| C | 44.30810 | 3.88960  | 9.76550  |

|   |          |          |          |
|---|----------|----------|----------|
| C | 45.20950 | 9.75940  | 11.98140 |
| C | 45.19910 | 10.96040 | 12.23920 |
| C | 43.93360 | 2.65300  | 9.05610  |
| C | 45.45770 | 12.39720 | 12.40770 |
| C | 44.87660 | 1.99990  | 8.23380  |
| C | 42.64010 | 2.08520  | 9.13220  |
| C | 42.30460 | 0.96430  | 8.32250  |
| C | 44.48400 | 0.88860  | 7.44860  |
| N | 43.20050 | 0.42470  | 7.45140  |
| C | 46.55640 | 12.86980 | 13.16780 |
| C | 46.91900 | 14.24250 | 13.12800 |
| N | 46.22010 | 15.11060 | 12.34450 |
| C | 44.68630 | 13.34570 | 11.70780 |
| C | 45.09260 | 14.69970 | 11.69670 |
| C | 47.90410 | 21.50060 | 10.39680 |
| C | 48.14830 | 22.37330 | 11.47310 |
| C | 48.18820 | 23.77200 | 11.28510 |
| C | 48.10520 | 24.30650 | 9.98630  |
| C | 47.91410 | 23.47410 | 8.86490  |
| C | 47.79600 | 22.05940 | 9.07950  |
| C | 47.80990 | 24.15020 | 7.54730  |
| C | 47.70810 | 20.07200 | 10.74760 |
| C | 47.48050 | 18.94850 | 11.20710 |
| C | 47.72290 | 24.84200 | 6.52790  |
| C | 47.47900 | 25.85180 | 4.77530  |
| C | 46.91810 | 17.09100 | 11.82960 |
| C | 46.15390 | 23.78450 | 13.28950 |
| C | 45.33580 | 23.83160 | 12.13480 |
| C | 44.18480 | 23.02500 | 12.03470 |
| C | 45.74980 | 22.98300 | 14.37420 |
| C | 44.57090 | 22.21950 | 14.30070 |
| C | 43.80250 | 22.20340 | 13.11620 |
| O | 44.16050 | 21.55230 | 15.42290 |
| C | 43.03720 | 22.15980 | 16.08210 |
| C | 43.15910 | 23.68690 | 16.31650 |
| O | 42.91220 | 24.38450 | 15.09700 |
| C | 43.02660 | 25.79700 | 15.22180 |
| C | 42.71690 | 26.45300 | 13.86280 |
| O | 43.87160 | 26.53930 | 13.02350 |
| O | 42.72040 | 21.36290 | 13.03620 |
| C | 41.47750 | 21.97830 | 12.70100 |
| C | 40.85910 | 21.23370 | 11.50810 |
| O | 41.43150 | 21.68480 | 10.28090 |
| C | 40.60980 | 22.65980 | 9.64530  |
| C | 41.37270 | 23.34960 | 8.49740  |
| O | 42.41580 | 24.22020 | 8.93640  |
| C | 41.92880 | 25.41850 | 9.54420  |
| C | 43.08770 | 26.30770 | 9.99350  |
| O | 43.64570 | 27.01140 | 8.88390  |
| C | 44.52300 | 27.80540 | 13.10600 |
| C | 45.80070 | 27.80930 | 12.24410 |
| O | 45.53840 | 27.63280 | 10.84570 |
| C | 43.95350 | 28.31820 | 9.17370  |
| C | 44.89660 | 28.65560 | 10.17920 |
| C | 43.30470 | 29.33130 | 8.44020  |
| C | 43.58430 | 30.68510 | 8.69950  |
| C | 44.52400 | 31.02800 | 9.68730  |
| C | 45.17940 | 30.02160 | 10.42110 |
| P | 46.33400 | 27.18420 | 5.62640  |

|    |          |          |           |
|----|----------|----------|-----------|
| P  | 48.67790 | 24.58780 | 3.94560   |
| C  | 50.33720 | 24.55890 | 4.85570   |
| C  | 51.02320 | 25.93420 | 4.81340   |
| C  | 47.92120 | 22.85480 | 4.03760   |
| C  | 46.58670 | 22.77690 | 3.27820   |
| C  | 49.12520 | 24.84540 | 2.11280   |
| C  | 50.04340 | 23.73270 | 1.58080   |
| C  | 46.31990 | 28.86700 | 4.74270   |
| C  | 45.51910 | 29.92090 | 5.52470   |
| C  | 46.87070 | 27.58370 | 7.39840   |
| C  | 48.32650 | 28.07470 | 7.48580   |
| C  | 44.54980 | 26.56870 | 5.63530   |
| C  | 44.38460 | 25.19400 | 6.30190   |
| P  | 45.78980 | 17.83310 | 13.23770  |
| C  | 46.51950 | 19.39850 | 14.01550  |
| C  | 47.91640 | 19.16370 | 14.61660  |
| C  | 44.08970 | 18.23500 | 12.52410  |
| C  | 44.15610 | 19.10560 | 11.25950  |
| C  | 45.50030 | 16.65890 | 14.70160  |
| C  | 44.73350 | 17.35070 | 15.84070  |
| P  | 48.09540 | 16.34220 | 10.49440  |
| C  | 47.57020 | 16.95090 | 8.77590   |
| C  | 46.16230 | 16.45430 | 8.40700   |
| C  | 49.86950 | 16.91150 | 10.80820  |
| C  | 50.37790 | 16.41550 | 12.17220  |
| C  | 48.18650 | 14.45090 | 10.31440  |
| C  | 49.06620 | 14.02940 | 9.12570   |
| O  | 48.25270 | 24.64260 | 12.34700  |
| C  | 47.41060 | 24.58740 | 13.43570  |
| H  | 47.03230 | 36.87510 | -4.56770  |
| O  | 49.06620 | 7.00080  | 11.32040  |
| C  | 49.76880 | 7.88660  | 10.57200  |
| O  | 49.34010 | 8.44650  | 9.56150   |
| C  | 51.05400 | 8.30960  | 11.22040  |
| C  | 52.07050 | 9.06840  | 10.56040  |
| C  | 53.18870 | 9.12150  | 11.45760  |
| C  | 52.82600 | 8.43960  | 12.67180  |
| C  | 51.48100 | 7.95630  | 12.53800  |
| C  | 50.63080 | 11.73640 | 13.68980  |
| C  | 51.41860 | 12.37240 | 12.68540  |
| C  | 50.84760 | 12.06280 | 11.41770  |
| C  | 49.69610 | 11.25150 | 11.64080  |
| C  | 49.57590 | 11.02900 | 13.04380  |
| H  | 50.94780 | 7.33090  | 13.25530  |
| H  | 48.79980 | 10.45290 | 13.54830  |
| Fe | 51.53980 | 10.15950 | 12.40450  |
| O  | 42.77340 | 19.21480 | -19.77370 |
| O  | 44.68120 | 18.12580 | -20.26720 |
| O  | 47.70050 | 25.15070 | 14.48170  |
| O  | 36.56840 | -5.11320 | 1.21470   |
| H  | 41.90610 | 16.81170 | -19.17710 |
| H  | 42.73160 | 20.70610 | -17.62470 |
| H  | 41.56950 | 17.56850 | -14.91110 |
| H  | 46.70190 | 19.48450 | -19.26760 |
| H  | 47.72250 | 21.42000 | -18.16120 |
| H  | 43.06710 | 21.74190 | -19.87200 |
| H  | 45.15870 | 25.51010 | -18.67180 |
| H  | 44.75910 | 24.83760 | -20.24220 |
| H  | 43.56530 | 26.88040 | -20.08980 |

|   |          |          |           |
|---|----------|----------|-----------|
| H | 42.35620 | 25.62470 | -19.89190 |
| H | 42.25080 | 28.43800 | -19.02370 |
| H | 40.97310 | 27.25850 | -18.80210 |
| H | 42.39870 | 28.70160 | -16.49590 |
| H | 40.92090 | 29.25020 | -17.25910 |
| H | 48.33400 | 23.30900 | -16.86140 |
| H | 48.22380 | 23.82150 | -18.54580 |
| H | 49.10160 | 25.67690 | -17.29850 |
| H | 47.47600 | 26.10070 | -17.80470 |
| H | 49.02530 | 27.22160 | -15.61020 |
| H | 47.39180 | 27.70970 | -16.01120 |
| H | 48.17570 | 26.38270 | -13.35760 |
| H | 48.22810 | 28.10890 | -13.55990 |
| H | 46.41840 | 29.25340 | -14.27390 |
| H | 45.08690 | 28.29430 | -14.88030 |
| H | 45.46650 | 29.16160 | -11.96380 |
| H | 44.43280 | 30.00200 | -13.11520 |
| H | 39.26190 | 28.88640 | -15.83750 |
| H | 39.13380 | 27.42550 | -14.90860 |
| H | 41.38970 | 29.46380 | -14.47250 |
| H | 39.87940 | 29.44680 | -13.59900 |
| H | 44.17770 | 29.32980 | -10.18570 |
| H | 42.39430 | 29.98260 | -8.61180  |
| H | 40.00840 | 29.57860 | -9.18090  |
| H | 39.40580 | 28.55020 | -11.34970 |
| H | 42.71430 | 19.83590 | -12.15120 |
| H | 43.95800 | 19.67230 | -10.96580 |
| H | 42.93170 | 21.54870 | -9.60160  |
| H | 41.63850 | 21.68920 | -10.80120 |
| H | 41.81980 | 20.22350 | -9.86400  |
| H | 46.29330 | 20.28040 | -12.86580 |
| H | 45.10470 | 20.11590 | -14.09140 |
| H | 45.73440 | 22.38650 | -15.02580 |
| H | 46.89210 | 22.60780 | -13.70550 |
| H | 47.13020 | 21.34860 | -14.89500 |
| H | 46.21540 | 23.11840 | -11.32620 |
| H | 44.89510 | 23.00160 | -10.16340 |
| H | 46.86130 | 21.81010 | -9.37260  |
| H | 45.57430 | 20.65590 | -9.63620  |
| H | 46.90810 | 20.79080 | -10.78660 |
| H | 40.93670 | 25.36950 | -12.51040 |
| H | 40.06740 | 25.41460 | -13.98930 |
| H | 40.27890 | 22.87340 | -12.26900 |
| H | 38.90100 | 23.95800 | -12.36920 |
| H | 39.37230 | 23.03590 | -13.77600 |
| H | 42.65560 | 26.22200 | -15.56940 |
| H | 43.42880 | 26.29770 | -14.04180 |
| H | 44.27400 | 24.45880 | -16.34970 |
| H | 44.97430 | 26.02650 | -16.05220 |
| H | 45.23980 | 24.73090 | -14.90970 |
| H | 42.23910 | 23.03740 | -16.59680 |
| H | 40.77750 | 22.57170 | -15.73250 |
| H | 39.77590 | 24.82430 | -16.19950 |
| H | 41.20900 | 25.20940 | -17.14540 |
| H | 40.16810 | 23.90700 | -17.64100 |
| H | 40.03360 | 14.41300 | -14.40590 |
| H | 38.58450 | 13.74740 | -13.74510 |
| H | 39.78510 | 11.58070 | -13.21740 |
| H | 41.28630 | 12.27510 | -13.85270 |

|   |          |          |           |
|---|----------|----------|-----------|
| H | 40.51820 | 12.96340 | -12.43820 |
| H | 36.99450 | 14.08150 | -16.30660 |
| H | 38.34650 | 14.92130 | -16.95220 |
| H | 36.85840 | 14.09420 | -18.75920 |
| H | 38.40720 | 13.29920 | -18.92340 |
| H | 37.02310 | 12.44090 | -18.22370 |
| H | 37.50700 | 10.77350 | -16.44660 |
| H | 38.42940 | 10.44600 | -14.98050 |
| H | 36.98130 | 12.06060 | -13.72400 |
| H | 36.04970 | 12.34960 | -15.19520 |
| H | 36.07040 | 10.76580 | -14.46730 |
| H | 43.44910 | 10.42970 | -16.57740 |
| H | 44.51050 | 11.26850 | -17.64490 |
| H | 44.83920 | 12.08380 | -15.33910 |
| H | 44.27580 | 13.39210 | -16.35260 |
| H | 43.16680 | 12.60810 | -15.22300 |
| H | 42.77830 | 10.51890 | -19.97700 |
| H | 41.67110 | 9.68600  | -18.98570 |
| H | 40.56370 | 10.31700 | -21.10270 |
| H | 39.81230 | 11.34780 | -19.89500 |
| H | 41.06260 | 11.97980 | -20.95530 |
| H | 42.03690 | 13.97140 | -19.63810 |
| H | 43.26670 | 14.24530 | -18.41710 |
| H | 44.80060 | 12.61410 | -19.56790 |
| H | 43.61130 | 12.46480 | -20.86430 |
| H | 44.36560 | 14.00200 | -20.54050 |
| H | 39.03020 | -1.92960 | -18.60070 |
| H | 34.79380 | -0.70440 | -18.57240 |
| H | 34.92280 | -3.29680 | -19.39970 |
| H | 39.03160 | -1.77050 | -22.51160 |
| H | 39.02620 | 0.48940  | -21.01370 |
| H | 36.48540 | 1.45730  | -20.96770 |
| H | 34.93520 | -0.20300 | -22.44780 |
| H | 38.73570 | -0.37910 | -14.41350 |
| H | 38.88630 | 2.93520  | -17.14470 |
| H | 39.65300 | 3.57550  | -12.94000 |
| H | 39.33810 | 1.45740  | -8.64230  |
| H | 39.57510 | -2.39420 | -10.54190 |
| H | 39.76370 | -3.46480 | -8.23250  |
| H | 39.54320 | 0.28840  | -6.40250  |
| H | 41.30880 | 7.81400  | -14.53740 |
| H | 41.62660 | 10.25470 | -15.13560 |
| H | 38.58240 | 7.47650  | -17.84480 |
| H | 38.98480 | 9.93400  | -18.36210 |
| H | 45.57160 | 34.65580 | -5.14660  |
| H | 49.63730 | 34.07830 | -6.75460  |
| H | 49.54330 | 36.51350 | -5.53720  |
| H | 44.81640 | 37.20250 | -8.01730  |
| H | 44.95300 | 34.53870 | -8.50190  |
| H | 47.38390 | 34.01110 | -9.60090  |
| H | 48.73290 | 36.35410 | -9.80140  |
| H | 45.64250 | 30.12440 | -7.46570  |
| H | 46.55350 | 30.70500 | -3.30640  |
| H | 45.66850 | 26.74130 | -4.77650  |
| H | 42.57240 | 25.55860 | -8.84930  |
| H | 46.25050 | 26.54810 | -10.85600 |
| H | 45.51010 | 25.11740 | -12.80050 |
| H | 41.95160 | 24.13790 | -10.84880 |
| H | 48.45240 | 28.80920 | 0.45250   |

|   |          |          |          |
|---|----------|----------|----------|
| H | 48.78280 | 28.06240 | 2.86800  |
| H | 44.95830 | 26.30730 | 0.25270  |
| H | 45.39250 | 25.62410 | 2.65900  |
| H | 39.03820 | -5.02490 | -0.84590 |
| H | 40.29690 | -4.39320 | 3.19350  |
| H | 41.70710 | -1.73560 | 0.11670  |
| H | 35.88270 | -3.39170 | 3.09920  |
| H | 36.18360 | -2.24450 | 5.25950  |
| H | 38.96880 | -6.21530 | 4.15430  |
| H | 38.72090 | -6.88110 | 6.77540  |
| H | 40.29360 | -6.90980 | 5.98510  |
| H | 39.82500 | -6.03500 | 8.89360  |
| H | 40.28370 | -7.65140 | 8.39220  |
| H | 42.29450 | -7.83250 | 9.21550  |
| H | 43.57360 | -6.75830 | 8.78090  |
| H | 41.33430 | -5.79000 | 10.63360 |
| H | 42.63430 | -6.73830 | 11.27590 |
| H | 36.67130 | -1.40160 | 7.43880  |
| H | 36.21390 | -3.06550 | 7.78770  |
| H | 36.59700 | -1.98960 | 9.89220  |
| H | 37.90750 | -3.13280 | 9.65450  |
| H | 37.74100 | -0.55580 | 11.27540 |
| H | 39.03130 | -1.74600 | 11.32200 |
| H | 39.43910 | 1.06250  | 10.18740 |
| H | 39.60000 | 0.76550  | 11.89560 |
| H | 41.89110 | 0.46850  | 12.43670 |
| H | 41.10590 | -1.09940 | 12.54380 |
| H | 43.57350 | -1.31690 | 12.54050 |
| H | 42.84540 | -2.14610 | 11.17690 |
| H | 44.66460 | -5.87470 | 11.58970 |
| H | 45.04840 | -5.51740 | 9.91640  |
| H | 44.76920 | -3.48860 | 12.19240 |
| H | 46.27170 | -4.07440 | 11.51560 |
| H | 45.36550 | 1.60370  | 11.41740 |
| H | 47.83980 | 1.51630  | 11.63170 |
| H | 49.05090 | -0.60640 | 11.18490 |
| H | 47.80500 | -2.63820 | 10.54410 |
| H | 42.30120 | 3.30730  | 4.80910  |
| H | 43.00010 | 2.71930  | 6.23490  |
| H | 44.75740 | 1.45070  | 4.71130  |
| H | 44.01850 | 2.28940  | 3.35760  |
| H | 44.79830 | 3.20310  | 4.62830  |
| H | 42.26450 | 0.63090  | 2.51210  |
| H | 40.57370 | 0.27460  | 2.85430  |
| H | 41.75060 | 3.06890  | 2.63010  |
| H | 40.63070 | 2.27400  | 1.55150  |
| H | 40.10130 | 2.72270  | 3.15660  |
| H | 40.17130 | 1.53270  | 6.82690  |
| H | 39.62220 | 2.10600  | 5.30450  |
| H | 38.92380 | -0.19370 | 4.60060  |
| H | 39.53490 | -0.85440 | 6.11630  |
| H | 38.18410 | 0.25460  | 6.12310  |
| H | 45.60770 | -2.11580 | 5.61850  |
| H | 45.49110 | -1.58960 | 7.28900  |
| H | 45.68310 | -4.48150 | 6.40280  |
| H | 46.79750 | -3.55170 | 7.36990  |
| H | 45.24040 | -4.00250 | 8.02790  |
| H | 42.99810 | -3.51300 | 8.61410  |
| H | 43.10110 | -1.81790 | 8.89850  |

|   |          |          |          |
|---|----------|----------|----------|
| H | 40.68150 | -3.36020 | 7.80940  |
| H | 40.83020 | -2.67890 | 9.40120  |
| H | 40.66390 | -1.61220 | 8.02260  |
| H | 42.87440 | -4.82740 | 6.37590  |
| H | 41.72630 | -4.02730 | 5.38860  |
| H | 43.03970 | -4.99540 | 3.70820  |
| H | 44.07570 | -3.57690 | 3.88890  |
| H | 44.45750 | -5.07930 | 4.70410  |
| H | 37.70980 | -3.58480 | -2.74450 |
| H | 36.33910 | -3.78570 | -3.73740 |
| H | 38.95800 | -5.33890 | -4.16800 |
| H | 37.46100 | -5.94770 | -3.49840 |
| H | 37.51440 | -5.48070 | -5.17920 |
| H | 37.47620 | -0.02690 | -5.15900 |
| H | 36.27470 | -0.88510 | -4.25210 |
| H | 39.05060 | -0.15520 | -3.15560 |
| H | 37.51410 | 0.57990  | -2.73390 |
| H | 37.82020 | -1.08220 | -2.28370 |
| H | 37.13060 | -2.03930 | -7.32040 |
| H | 37.49450 | -3.74900 | -7.09700 |
| H | 35.05620 | -3.22160 | -7.31490 |
| H | 35.39380 | -4.01130 | -5.79990 |
| H | 35.10440 | -2.27140 | -5.84490 |
| H | 43.68840 | -4.00150 | -5.06120 |
| H | 42.46950 | -4.24890 | -3.87400 |
| H | 42.48850 | -6.11090 | -5.50040 |
| H | 40.95560 | -5.28380 | -5.66150 |
| H | 42.24640 | -5.02840 | -6.84780 |
| H | 42.22450 | -2.77200 | -7.87320 |
| H | 42.20960 | -1.03680 | -7.56040 |
| H | 44.50650 | -1.20680 | -6.57510 |
| H | 44.51040 | -2.93960 | -6.90920 |
| H | 44.43480 | -1.79330 | -8.22090 |
| H | 42.44690 | -1.22700 | -3.25400 |
| H | 43.70900 | -1.03040 | -4.41320 |
| H | 42.31400 | 0.64940  | -5.69690 |
| H | 41.03250 | 0.48950  | -4.48080 |
| H | 42.60100 | 1.13500  | -4.04190 |
| H | 43.80160 | 7.42820  | 11.10920 |
| H | 47.67500 | 9.06450  | 12.05410 |
| H | 47.39790 | 5.06140  | 10.56410 |
| H | 45.89540 | 2.37700  | 8.19640  |
| H | 41.91120 | 2.50480  | 9.82100  |
| H | 41.31750 | 0.52710  | 8.34520  |
| H | 45.16920 | 0.45670  | 6.73680  |
| H | 47.15690 | 12.16130 | 13.73480 |
| H | 47.80150 | 14.61320 | 13.63340 |
| H | 43.81890 | 13.00620 | 11.14730 |
| H | 44.56640 | 15.43660 | 11.10780 |
| H | 48.23120 | 21.98920 | 12.48160 |
| H | 48.15760 | 25.38260 | 9.87990  |
| H | 47.60780 | 21.40730 | 8.24040  |
| H | 45.58310 | 24.50430 | 11.32830 |
| H | 43.57690 | 23.06270 | 11.14200 |
| H | 46.31590 | 22.99780 | 15.29710 |
| H | 42.11140 | 21.93080 | 15.55640 |
| H | 42.95050 | 21.67260 | 17.05380 |
| H | 42.41820 | 23.99760 | 17.05520 |
| H | 44.14060 | 23.93620 | 16.72330 |



|   |          |          |          |
|---|----------|----------|----------|
| H | 42.29950 | 26.14110 | 15.95960 |
| H | 44.01500 | 26.08750 | 15.58120 |
| H | 41.95320 | 25.86930 | 13.34810 |
| H | 42.27550 | 27.43960 | 14.01820 |
| H | 40.82190 | 21.86590 | 13.56500 |
| H | 41.54370 | 23.05220 | 12.51510 |
| H | 41.03120 | 20.16340 | 11.61690 |
| H | 39.77340 | 21.35490 | 11.51100 |
| H | 39.73810 | 22.14850 | 9.23340  |
| H | 40.21800 | 23.38300 | 10.36010 |
| H | 41.81040 | 22.58750 | 7.85300  |
| H | 40.67350 | 23.90830 | 7.87280  |
| H | 41.27060 | 25.96910 | 8.87020  |
| H | 41.34910 | 25.18190 | 10.43520 |
| H | 42.69450 | 27.00470 | 10.73780 |
| H | 43.85060 | 25.71240 | 10.48980 |
| H | 43.84940 | 28.60400 | 12.79100 |
| H | 44.79280 | 28.00740 | 14.14420 |
| H | 46.38730 | 28.70640 | 12.43750 |
| H | 46.44000 | 26.99180 | 12.56300 |
| H | 42.55240 | 29.07920 | 7.70780  |
| H | 43.05940 | 31.46840 | 8.16800  |
| H | 44.72720 | 32.07010 | 9.90220  |
| H | 45.89430 | 30.33430 | 11.16820 |
| H | 50.25150 | 24.22640 | 5.88900  |
| H | 51.00030 | 23.82680 | 4.39370  |
| H | 51.24140 | 26.25640 | 3.79400  |
| H | 50.44190 | 26.71280 | 5.30620  |
| H | 51.98530 | 25.89070 | 5.33040  |
| H | 48.61790 | 22.13190 | 3.61180  |
| H | 47.77910 | 22.52620 | 5.06610  |
| H | 46.19770 | 21.75680 | 3.30510  |
| H | 45.82110 | 23.41670 | 3.71560  |
| H | 46.70120 | 23.03740 | 2.22470  |
| H | 48.24980 | 24.86130 | 1.46570  |
| H | 49.66830 | 25.77920 | 1.96940  |
| H | 49.57710 | 22.74790 | 1.61490  |
| H | 50.30220 | 23.91800 | 0.53610  |
| H | 50.98990 | 23.67830 | 2.12090  |
| H | 47.33060 | 29.25050 | 4.59700  |
| H | 45.83750 | 28.81370 | 3.76800  |
| H | 44.49950 | 29.59890 | 5.74090  |
| H | 45.99110 | 30.19150 | 6.47080  |
| H | 45.43910 | 30.84940 | 4.95510  |
| H | 46.24280 | 28.38950 | 7.77140  |
| H | 46.68200 | 26.77180 | 8.10010  |
| H | 49.05570 | 27.30950 | 7.22570  |
| H | 48.50150 | 28.95100 | 6.85940  |
| H | 48.55110 | 28.38430 | 8.50960  |
| H | 43.93890 | 27.28450 | 6.18890  |
| H | 44.12980 | 26.55170 | 4.63030  |
| H | 44.87240 | 24.39100 | 5.75330  |
| H | 44.76250 | 25.19570 | 7.32640  |
| H | 43.32510 | 24.93810 | 6.37410  |
| H | 46.52060 | 20.25110 | 13.33930 |
| H | 45.86420 | 19.72090 | 14.82400 |
| H | 48.26250 | 20.06980 | 15.12020 |
| H | 47.90660 | 18.38020 | 15.37650 |
| H | 48.66900 | 18.91210 | 13.87110 |

|   |          |          |          |
|---|----------|----------|----------|
| H | 43.51650 | 17.32920 | 12.32950 |
| H | 43.51780 | 18.77990 | 13.27880 |
| H | 43.14970 | 19.37090 | 10.93130 |
| H | 44.67070 | 20.04850 | 11.45080 |
| H | 44.64070 | 18.60730 | 10.42350 |
| H | 44.88740 | 15.80240 | 14.42400 |
| H | 46.44020 | 16.27940 | 15.10490 |
| H | 44.46950 | 16.63430 | 16.62190 |
| H | 45.32490 | 18.12500 | 16.33240 |
| H | 43.80050 | 17.80720 | 15.50590 |
| H | 47.61380 | 18.03420 | 8.68470  |
| H | 48.28190 | 16.59070 | 8.03250  |
| H | 46.10710 | 15.36430 | 8.39360  |
| H | 45.39570 | 16.82890 | 9.08350  |
| H | 45.89320 | 16.79050 | 7.40380  |
| H | 50.52680 | 16.52220 | 10.03000 |
| H | 49.98000 | 17.99350 | 10.74930 |
| H | 51.41200 | 16.73270 | 12.32780 |
| H | 49.80230 | 16.81120 | 13.00840 |
| H | 50.38200 | 15.32550 | 12.23990 |
| H | 48.63540 | 13.99590 | 11.19750 |
| H | 47.21270 | 13.99000 | 10.16080 |
| H | 49.14160 | 12.94100 | 9.07910  |
| H | 48.66390 | 14.35060 | 8.16520  |
| H | 50.08740 | 14.40310 | 9.21220  |
| H | 52.04710 | 9.42320  | 9.53050  |
| H | 54.17630 | 9.52660  | 11.22960 |
| H | 53.49280 | 8.24250  | 13.51420 |
| H | 50.79420 | 11.80330 | 14.76780 |
| H | 52.28980 | 13.00540 | 12.86480 |
| H | 51.21670 | 12.40670 | 10.45180 |
| H | 49.02800 | 10.86750 | 10.87020 |

## 6:

|   |          |          |           |
|---|----------|----------|-----------|
| C | 42.68650 | 15.95650 | -14.61490 |
| C | 41.87220 | 16.77240 | -15.43790 |
| C | 42.02460 | 18.17470 | -15.46150 |
| C | 43.03740 | 18.75820 | -14.68350 |
| C | 43.84770 | 17.99870 | -13.82890 |
| C | 43.67610 | 16.58230 | -13.79260 |
| C | 44.78730 | 18.79520 | -13.02320 |
| C | 42.44430 | 14.49680 | -14.63990 |
| C | 42.11380 | 13.31400 | -14.73140 |
| C | 45.37910 | 19.72990 | -12.48770 |
| C | 47.14040 | 25.09540 | -9.33450  |
| C | 39.90760 | 7.20080  | -14.54880 |
| C | 41.21980 | 21.19300 | -15.18360 |
| C | 42.11650 | 21.85710 | -16.04390 |
| C | 42.88430 | 22.94280 | -15.57540 |
| C | 41.06850 | 21.65950 | -13.86070 |
| C | 41.81950 | 22.76140 | -13.39390 |
| C | 42.75050 | 23.40490 | -14.24030 |
| O | 41.62010 | 23.23000 | -12.11920 |
| C | 40.43420 | 24.02230 | -12.01690 |
| C | 39.69900 | 23.74100 | -10.70010 |

|   |          |          |           |
|---|----------|----------|-----------|
| O | 40.28790 | 24.47820 | -9.63390  |
| C | 39.54720 | 24.38450 | -8.42140  |
| C | 39.71460 | 25.67960 | -7.61610  |
| O | 41.00570 | 25.76920 | -7.00730  |
| O | 43.49650 | 24.44340 | -13.70980 |
| C | 44.06440 | 25.36120 | -14.64250 |
| C | 44.50900 | 26.64990 | -13.93550 |
| O | 45.74180 | 26.47100 | -13.21650 |
| C | 46.61320 | 27.59760 | -13.33780 |
| C | 46.09530 | 28.83870 | -12.59110 |
| O | 46.22960 | 28.71470 | -11.16890 |
| C | 45.61390 | 29.85710 | -10.55740 |
| C | 46.04260 | 30.06580 | -9.09920  |
| O | 45.42520 | 29.09550 | -8.25280  |
| C | 41.16520 | 26.99120 | -6.29010  |
| C | 41.69050 | 28.11830 | -7.20080  |
| O | 43.11950 | 28.07770 | -7.26950  |
| C | 44.99720 | 29.53570 | -7.01720  |
| C | 43.80450 | 28.98780 | -6.49160  |
| C | 45.71290 | 30.49680 | -6.26300  |
| C | 45.26180 | 30.89060 | -4.99030  |
| C | 44.08680 | 30.33300 | -4.45980  |
| C | 43.36100 | 29.38680 | -5.20630  |
| P | 45.26270 | 25.07680 | -8.82060  |
| P | 48.99040 | 25.14510 | -9.91820  |
| C | 50.11140 | 24.60630 | -8.49260  |
| C | 49.79120 | 23.20300 | -7.95940  |
| C | 49.46960 | 24.08660 | -11.42060 |
| C | 48.95420 | 24.65190 | -12.75790 |
| C | 49.53790 | 26.90980 | -10.37350 |
| C | 51.01680 | 26.96490 | -10.79500 |
| C | 44.98070 | 25.57750 | -7.00870  |
| C | 45.69650 | 24.64420 | -6.01140  |
| C | 44.39100 | 26.28820 | -9.96820  |
| C | 42.88380 | 26.07860 | -10.08230 |
| C | 44.42490 | 23.35570 | -8.91170  |
| C | 43.11050 | 23.25630 | -8.12050  |
| P | 38.11400 | 7.80370  | -15.02250 |
| C | 37.34560 | 8.74310  | -13.57880 |
| C | 37.29720 | 7.88950  | -12.30180 |
| C | 38.10440 | 8.93700  | -16.53420 |
| C | 38.64520 | 8.21980  | -17.78390 |
| C | 36.89360 | 6.41240  | -15.46840 |
| C | 35.55690 | 6.95340  | -16.00440 |
| P | 41.69930 | 6.58280  | -14.16380 |
| C | 41.81740 | 6.05870  | -12.35060 |
| C | 41.59150 | 7.23950  | -11.39280 |
| C | 42.11020 | 5.08200  | -15.23960 |
| C | 41.96180 | 5.40580  | -16.73530 |
| C | 43.11750 | 7.81400  | -14.45450 |
| C | 44.48410 | 7.21270  | -14.08710 |
| C | 36.60300 | -2.78240 | -16.62180 |
| C | 35.92720 | -1.52530 | -16.63310 |
| C | 34.61580 | -1.68750 | -17.17730 |
| C | 34.42000 | -3.09650 | -17.36880 |
| C | 35.64860 | -3.76820 | -17.04140 |
| H | 35.79070 | -4.85520 | -17.00600 |
| C | 37.55010 | -2.74880 | -19.97120 |
| C | 37.68560 | -1.47680 | -19.33030 |

|    |          |          |           |
|----|----------|----------|-----------|
| C  | 36.53130 | -0.69360 | -19.65070 |
| C  | 35.68280 | -1.47970 | -20.49320 |
| C  | 36.31520 | -2.74830 | -20.69620 |
| H  | 35.98180 | -3.52570 | -21.39460 |
| Fe | 35.93550 | -2.46640 | -18.65880 |
| C  | 36.39640 | -0.24580 | -15.95390 |
| O  | 35.99230 | 0.85710  | -16.30570 |
| O  | 37.24360 | -0.46430 | -14.90710 |
| C  | 37.52360 | 0.51030  | -13.95970 |
| C  | 37.34250 | 0.17340  | -12.59730 |
| C  | 38.01550 | 1.80210  | -14.28850 |
| C  | 38.30470 | 2.76470  | -13.28880 |
| C  | 37.61800 | 1.08800  | -11.55380 |
| C  | 38.09890 | 2.38990  | -11.91830 |
| C  | 37.39270 | 0.64250  | -10.14500 |
| C  | 37.18290 | 0.21410  | -9.00180  |
| C  | 38.80360 | 4.10920  | -13.71220 |
| C  | 39.20170 | 5.21120  | -14.11410 |
| C  | 52.47070 | 33.29310 | -8.18470  |
| C  | 51.47550 | 33.17050 | -7.16560  |
| C  | 50.68820 | 34.36040 | -7.11660  |
| C  | 51.11490 | 35.18320 | -8.21210  |
| C  | 52.20300 | 34.52040 | -8.87870  |
| C  | 54.65940 | 35.30610 | -6.11180  |
| C  | 54.03350 | 34.21920 | -5.42290  |
| C  | 52.83830 | 34.71410 | -4.81180  |
| C  | 52.71490 | 36.10210 | -5.13450  |
| C  | 53.84560 | 36.47060 | -5.93130  |
| H  | 54.11390 | 37.49100 | -6.23170  |
| Fe | 52.75290 | 34.98510 | -6.91970  |
| C  | 51.17800 | 31.86300 | -6.44200  |
| O  | 51.98390 | 30.94020 | -6.41760  |
| O  | 49.93950 | 31.80660 | -5.88110  |
| C  | 49.41760 | 30.59560 | -5.45780  |
| C  | 49.00030 | 29.62250 | -6.40060  |
| C  | 49.21700 | 30.34990 | -4.07820  |
| C  | 48.62490 | 29.14880 | -3.61810  |
| C  | 48.38560 | 28.41350 | -5.99690  |
| C  | 48.20740 | 28.18720 | -4.59440  |
| C  | 47.94620 | 27.45060 | -7.04530  |
| C  | 47.60710 | 26.67640 | -7.94860  |
| C  | 48.46930 | 28.94060 | -2.15100  |
| C  | 48.37680 | 28.77990 | -0.92830  |
| C  | 36.32850 | -0.84180 | 2.23440   |
| C  | 35.44740 | -1.81840 | 2.75530   |
| C  | 35.26890 | -1.99060 | 4.14420   |
| C  | 36.03430 | -1.18860 | 5.01720   |
| C  | 36.82940 | -0.13280 | 4.54860   |
| C  | 36.99930 | 0.03110  | 3.14360   |
| C  | 37.35220 | 0.76690  | 5.59090   |
| C  | 36.48120 | -0.75720 | 0.76740   |
| C  | 36.53690 | -0.78000 | -0.46140  |
| C  | 37.57460 | 1.40670  | 6.61660   |
| C  | 38.59170 | 5.06620  | 11.86510  |
| C  | 36.93270 | -0.29470 | -6.92250  |
| C  | 33.80040 | -2.02410 | 6.85550   |
| C  | 32.94540 | -1.00110 | 6.40210   |
| C  | 32.83110 | 0.19380  | 7.13630   |
| C  | 34.46160 | -1.88370 | 8.09710   |

|   |          |          |          |
|---|----------|----------|----------|
| C | 34.37230 | -0.67390 | 8.83010  |
| C | 33.56500 | 0.37110  | 8.32890  |
| O | 35.07270 | -0.42440 | 9.99250  |
| C | 35.57220 | -1.53340 | 10.73220 |
| C | 36.22920 | -0.98460 | 12.00920 |
| O | 37.48860 | -0.37120 | 11.71080 |
| C | 38.59730 | -1.26640 | 11.80760 |
| C | 39.14040 | -1.32800 | 13.24610 |
| O | 39.82570 | -0.11600 | 13.55370 |
| O | 33.52800 | 1.57400  | 8.99100  |
| C | 32.28510 | 1.84300  | 9.63420  |
| C | 32.31510 | 1.32580  | 11.07760 |
| O | 33.17710 | 2.14840  | 11.86010 |
| C | 33.12550 | 1.78670  | 13.23390 |
| C | 33.86170 | 2.86260  | 14.03980 |
| O | 35.27260 | 2.83100  | 13.79220 |
| C | 35.93620 | 1.99030  | 14.72990 |
| C | 37.41170 | 1.89510  | 14.34250 |
| O | 38.04040 | 3.18300  | 14.34630 |
| C | 40.37370 | -0.14850 | 14.87250 |
| C | 41.28290 | 1.07070  | 15.07750 |
| O | 40.57880 | 2.28070  | 14.76590 |
| C | 38.64580 | 3.43200  | 15.55570 |
| C | 39.94660 | 2.93510  | 15.79680 |
| C | 37.96440 | 4.14700  | 16.56300 |
| C | 38.58610 | 4.38520  | 17.80250 |
| C | 39.89120 | 3.91550  | 18.03610 |
| C | 40.57300 | 3.19660  | 17.03670 |
| P | 40.41090 | 4.36650  | 11.84660 |
| P | 36.77000 | 5.70250  | 11.94830 |
| C | 36.73150 | 7.43340  | 11.16480 |
| C | 37.10220 | 7.44880  | 9.67430  |
| C | 35.46370 | 4.69560  | 11.01310 |
| C | 34.08110 | 5.36100  | 11.10420 |
| C | 36.15020 | 5.90380  | 13.73450 |
| C | 35.60020 | 7.30650  | 14.04360 |
| C | 41.52730 | 4.90230  | 13.29940 |
| C | 42.91270 | 4.23130  | 13.28500 |
| C | 40.51980 | 2.47850  | 11.71420 |
| C | 40.96630 | 1.96060  | 10.33320 |
| C | 41.31430 | 5.09030  | 10.34420 |
| C | 41.29560 | 6.62780  | 10.33640 |
| P | 38.74300 | -0.98670 | -6.94090 |
| C | 39.39050 | -1.92850 | -5.42260 |
| C | 39.85120 | -1.06700 | -4.22900 |
| C | 38.90550 | -2.25920 | -8.32970 |
| C | 37.83320 | -3.35600 | -8.21770 |
| C | 39.97280 | 0.40970  | -7.29980 |
| C | 41.41220 | -0.12190 | -7.39830 |
| P | 35.08250 | 0.31830  | -6.92600 |
| C | 34.98050 | 2.06200  | -6.21290 |
| C | 35.95750 | 3.02140  | -6.91170 |
| C | 34.27850 | 0.40430  | -8.64980 |
| C | 32.77040 | 0.70170  | -8.58350 |
| C | 33.93060 | -0.80080 | -5.93000 |
| C | 33.89780 | -2.23020 | -6.49990 |
| C | 40.11040 | 9.93300  | 14.59460 |
| C | 40.10500 | 8.52790  | 14.89880 |
| C | 40.78320 | 10.86570 | 15.45010 |

|   |          |          |          |
|---|----------|----------|----------|
| C | 41.41160 | 10.37040 | 16.59790 |
| C | 40.80420 | 8.07920  | 16.04430 |
| C | 41.49190 | 8.99450  | 16.86640 |
| C | 39.48560 | 7.49160  | 14.03640 |
| C | 39.10220 | 6.54630  | 13.34120 |
| C | 40.99250 | 12.31300 | 15.20680 |
| C | 41.39740 | 13.47670 | 15.12400 |
| C | 44.82860 | 23.23140 | 10.91740 |
| C | 44.13860 | 24.37660 | 11.38060 |
| C | 44.24470 | 25.62000 | 10.72380 |
| C | 45.04750 | 25.70200 | 9.56950  |
| C | 45.74320 | 24.59170 | 9.06530  |
| C | 45.64150 | 23.34430 | 9.74820  |
| C | 46.49420 | 24.84160 | 7.82360  |
| C | 44.63530 | 21.96890 | 11.66000 |
| C | 44.33660 | 20.99150 | 12.34530 |
| C | 46.97040 | 25.33120 | 6.80190  |
| C | 48.17710 | 28.18700 | 1.13230  |
| C | 42.18240 | 15.45860 | 14.82770 |
| C | 44.01160 | 28.66480 | 9.77700  |
| C | 42.79940 | 28.70750 | 9.06110  |
| C | 42.76680 | 29.23860 | 7.75650  |
| C | 45.18330 | 29.19210 | 9.19010  |
| C | 45.16080 | 29.70980 | 7.87390  |
| C | 43.94070 | 29.73450 | 7.15470  |
| O | 46.31300 | 30.08040 | 7.22180  |
| C | 47.18470 | 30.98970 | 7.88490  |
| C | 48.59350 | 30.73810 | 7.32180  |
| O | 48.63240 | 30.79560 | 5.89170  |
| C | 48.52430 | 32.11950 | 5.38000  |
| C | 48.95990 | 32.10460 | 3.90570  |
| O | 48.12300 | 31.25570 | 3.09780  |
| O | 43.86690 | 30.20440 | 5.86310  |
| C | 44.37770 | 31.52160 | 5.66510  |
| C | 43.45490 | 32.31020 | 4.73240  |
| O | 43.59150 | 31.88060 | 3.37700  |
| C | 42.75690 | 32.67520 | 2.53580  |
| C | 42.67770 | 32.09780 | 1.11830  |
| O | 43.88320 | 32.36650 | 0.40380  |
| C | 43.64320 | 32.87420 | -0.90740 |
| C | 44.95510 | 33.34620 | -1.54100 |
| O | 45.88580 | 32.26700 | -1.64190 |
| C | 46.96170 | 31.95250 | 2.63620  |
| C | 47.27840 | 32.71690 | 1.34620  |
| O | 47.75330 | 31.80110 | 0.35780  |
| C | 47.17530 | 32.70380 | -1.80670 |
| C | 48.12160 | 32.46720 | -0.78490 |
| C | 47.55380 | 33.43110 | -2.95690 |
| C | 48.86340 | 33.93220 | -3.08120 |
| C | 49.80190 | 33.70860 | -2.05660 |
| C | 49.43120 | 32.97770 | -0.91240 |
| P | 46.27630 | 27.95670 | 0.82070  |
| P | 50.09090 | 28.44480 | 1.35800  |
| C | 50.90360 | 27.95990 | 3.00610  |
| C | 50.78800 | 29.02240 | 4.10570  |
| C | 50.99590 | 27.33450 | 0.11800  |
| C | 50.61790 | 25.85310 | 0.25460  |
| C | 50.62890 | 30.20530 | 0.93870  |
| C | 52.15840 | 30.36690 | 0.95040  |

|    |          |          |           |
|----|----------|----------|-----------|
| C  | 45.44530 | 29.41250 | -0.07270  |
| C  | 44.02450 | 29.05540 | -0.54520  |
| C  | 45.12220 | 27.53390 | 2.27360   |
| C  | 44.63550 | 28.75880 | 3.06740   |
| C  | 46.06540 | 26.47590 | -0.34780  |
| C  | 46.48090 | 25.13700 | 0.28140   |
| P  | 41.13890 | 16.02960 | 16.37070  |
| C  | 41.43720 | 17.80290 | 16.96990  |
| C  | 42.78490 | 17.97130 | 17.69790  |
| C  | 39.29740 | 15.87810 | 15.98090  |
| C  | 38.86940 | 16.71430 | 14.76630  |
| C  | 41.48070 | 14.94280 | 17.88680  |
| C  | 40.62080 | 15.35340 | 19.09420  |
| P  | 43.26920 | 14.84510 | 13.33480  |
| C  | 43.02400 | 15.87580 | 11.76430  |
| C  | 41.57120 | 15.82160 | 11.26200  |
| C  | 45.10160 | 14.89330 | 13.78210  |
| C  | 45.36170 | 14.22780 | 15.14180  |
| C  | 42.97280 | 13.05540 | 12.73460  |
| C  | 43.78300 | 12.68970 | 11.47740  |
| H  | 52.67540 | 34.84760 | -9.81330  |
| O  | 42.30820 | 8.58840  | 17.89150  |
| C  | 43.64640 | 8.71470  | 17.69520  |
| O  | 44.17260 | 8.76240  | 16.58060  |
| C  | 44.40040 | 9.04930  | 18.94700  |
| C  | 45.82620 | 9.07850  | 19.03390  |
| C  | 46.14540 | 9.23910  | 20.42330  |
| C  | 44.91520 | 9.38230  | 21.15590  |
| C  | 43.82290 | 9.29950  | 20.22960  |
| C  | 45.64640 | 13.16840 | 19.38810  |
| C  | 45.69670 | 12.48220 | 18.14120  |
| C  | 44.38420 | 12.02130 | 17.84260  |
| C  | 43.53090 | 12.37690 | 18.93030  |
| C  | 44.30870 | 13.10210 | 19.87590  |
| H  | 42.76420 | 9.28760  | 20.48850  |
| H  | 43.94470 | 13.55700 | 20.79980  |
| Fe | 45.14320 | 11.04010 | 19.78410  |
| C  | 37.73980 | 2.17190  | 7.86230   |
| C  | 38.20220 | 3.49670  | 7.80220   |
| C  | 37.43420 | 1.64540  | 9.14360   |
| C  | 38.37030 | 4.22520  | 8.99780   |
| C  | 37.61230 | 2.43310  | 10.31820  |
| N  | 38.10910 | 3.69620  | 10.22800  |
| C  | 36.59190 | -0.75910 | -1.93380  |
| C  | 36.35230 | -1.90510 | -2.73630  |
| C  | 36.90440 | 0.44300  | -2.59580  |
| C  | 36.43650 | -1.82260 | -4.15780  |
| N  | 36.74820 | -0.64020 | -4.76720  |
| C  | 36.98160 | 0.46720  | -4.00600  |
| C  | 41.61510 | 11.92520 | -14.78690 |
| C  | 41.68300 | 11.11720 | -15.95180 |
| C  | 41.02480 | 11.35510 | -13.64230 |
| C  | 41.18010 | 9.78180  | -15.93780 |
| N  | 40.62040 | 9.25710  | -14.80590 |
| C  | 40.54330 | 10.02680 | -13.68270 |
| C  | 45.90740 | 20.97080 | -11.90010 |
| C  | 46.70640 | 20.94070 | -10.74240 |
| C  | 47.08890 | 22.15670 | -10.12960 |
| N  | 46.71030 | 23.37560 | -10.62100 |

|   |          |          |           |
|---|----------|----------|-----------|
| C | 45.98490 | 23.43160 | -11.77180 |
| C | 45.57780 | 22.24040 | -12.43240 |
| C | 43.84000 | 19.84330 | 13.12530  |
| C | 42.48940 | 19.45430 | 13.01430  |
| C | 42.03710 | 18.27940 | 13.65980  |
| N | 42.87630 | 17.49040 | 14.39180  |
| C | 44.15600 | 17.90920 | 14.61490  |
| C | 44.66710 | 19.07910 | 13.98430  |
| C | 47.38850 | 26.04790 | 5.58730   |
| C | 47.85700 | 25.34790 | 4.46060   |
| C | 47.28730 | 27.45540 | 5.48390   |
| C | 47.59070 | 28.12050 | 4.26460   |
| N | 47.97780 | 27.41180 | 3.16990   |
| C | 48.14070 | 26.05870 | 3.27170   |
| O | 41.22720 | 18.94070 | -16.28160 |
| C | 40.43950 | 19.97320 | -15.67160 |
| O | 34.30730 | -2.89520 | 4.56180   |
| C | 34.12870 | -3.21400 | 5.95380   |
| O | 43.51170 | 26.68470 | 11.20790  |
| C | 44.07240 | 28.00440 | 11.15180  |
| H | 41.11530 | 16.32920 | -16.07020 |
| H | 43.21710 | 19.81760 | -14.74460 |
| H | 44.30180 | 15.98260 | -13.14870 |
| H | 42.22850 | 21.51810 | -17.06630 |
| H | 43.56700 | 23.40370 | -16.27480 |
| H | 40.36260 | 21.17560 | -13.20210 |
| H | 40.68490 | 25.08040 | -12.10080 |
| H | 39.74140 | 23.81530 | -12.83640 |
| H | 38.66290 | 24.06180 | -10.82530 |
| H | 39.68140 | 22.67260 | -10.48080 |
| H | 38.48130 | 24.26310 | -8.62520  |
| H | 39.85930 | 23.51140 | -7.84780  |
| H | 39.51660 | 26.53670 | -8.26170  |
| H | 38.95450 | 25.69500 | -6.83280  |
| H | 44.90660 | 24.91360 | -15.17220 |
| H | 43.31290 | 25.63020 | -15.38840 |
| H | 44.61350 | 27.41200 | -14.71120 |
| H | 43.72860 | 27.00950 | -13.26350 |
| H | 47.59920 | 27.33230 | -12.96620 |
| H | 46.76300 | 27.83410 | -14.39370 |
| H | 46.68320 | 29.69710 | -12.92340 |
| H | 45.06220 | 29.05230 | -12.87190 |
| H | 45.89360 | 30.76410 | -11.09890 |
| H | 44.52690 | 29.78290 | -10.62580 |
| H | 47.12750 | 30.02170 | -9.00420  |
| H | 45.73630 | 31.07740 | -8.82380  |
| H | 40.22570 | 27.29230 | -5.82160  |
| H | 41.86220 | 26.82110 | -5.47020  |
| H | 41.28430 | 28.02630 | -8.20770  |
| H | 41.33340 | 29.08840 | -6.84970  |
| H | 46.60570 | 30.95960 | -6.65500  |
| H | 45.79840 | 31.64450 | -4.43290  |
| H | 43.71950 | 30.66290 | -3.49800  |
| H | 42.44470 | 29.00090 | -4.78510  |
| H | 51.14520 | 24.60710 | -8.84360  |
| H | 50.09130 | 25.32980 | -7.67810  |
| H | 50.51200 | 22.92860 | -7.18570  |
| H | 48.80380 | 23.14450 | -7.50370  |
| H | 49.88220 | 22.44440 | -8.73880  |



|   |          |          |           |
|---|----------|----------|-----------|
| H | 50.55970 | 24.06310 | -11.48240 |
| H | 49.21340 | 23.03560 | -11.32040 |
| H | 49.48120 | 25.56830 | -13.03060 |
| H | 49.14660 | 23.94880 | -13.57190 |
| H | 47.89500 | 24.88790 | -12.77700 |
| H | 48.92430 | 27.30180 | -11.18230 |
| H | 49.42760 | 27.61810 | -9.55650  |
| H | 51.30090 | 27.98540 | -11.06090 |
| H | 51.68920 | 26.65280 | -9.99500  |
| H | 51.23300 | 26.35150 | -11.67020 |
| H | 45.23390 | 26.61740 | -6.82120  |
| H | 43.90900 | 25.54440 | -6.80790  |
| H | 45.45090 | 24.93510 | -4.98900  |
| H | 45.38270 | 23.60620 | -6.12610  |
| H | 46.78100 | 24.67870 | -6.10400  |
| H | 44.55110 | 27.30160 | -9.61130  |
| H | 44.82450 | 26.25950 | -10.96280 |
| H | 42.64500 | 25.10890 | -10.51700 |
| H | 42.38790 | 26.15630 | -9.11800  |
| H | 42.43400 | 26.83400 | -10.72920 |
| H | 44.15000 | 23.11090 | -9.93730  |
| H | 45.07190 | 22.56680 | -8.53420  |
| H | 42.41460 | 24.05160 | -8.36910  |
| H | 42.59540 | 22.32010 | -8.34300  |
| H | 43.25860 | 23.28350 | -7.04160  |
| H | 37.84800 | 9.68970  | -13.38960 |
| H | 36.32440 | 9.02440  | -13.84390 |
| H | 36.70080 | 6.98690  | -12.44810 |
| H | 38.28410 | 7.59410  | -11.95170 |
| H | 36.81900 | 8.44820  | -11.49400 |
| H | 37.07610 | 9.23720  | -16.74410 |
| H | 38.60430 | 9.88920  | -16.37490 |
| H | 38.66270 | 8.90250  | -18.63760 |
| H | 39.65100 | 7.82120  | -17.66900 |
| H | 37.99720 | 7.39160  | -18.07940 |
| H | 37.31760 | 5.73470  | -16.21090 |
| H | 36.64100 | 5.81470  | -14.59380 |
| H | 34.84850 | 6.13720  | -16.16160 |
| H | 35.07860 | 7.65380  | -15.31870 |
| H | 35.66320 | 7.44750  | -16.97140 |
| H | 41.12260 | 5.25370  | -12.11640 |
| H | 42.80600 | 5.63540  | -12.16500 |
| H | 41.73500 | 6.91650  | -10.35950 |
| H | 42.30860 | 8.04430  | -11.56460 |
| H | 40.58500 | 7.64730  | -11.45980 |
| H | 43.13990 | 4.77230  | -15.05700 |
| H | 41.52180 | 4.20100  | -14.98890 |
| H | 42.60870 | 6.22820  | -17.04610 |
| H | 42.25920 | 4.54340  | -17.33740 |
| H | 40.93610 | 5.64240  | -17.01700 |
| H | 43.17860 | 8.10260  | -15.50390 |
| H | 43.01040 | 8.72160  | -13.86220 |
| H | 45.28110 | 7.94000  | -14.25770 |
| H | 44.55030 | 6.92150  | -13.03830 |
| H | 44.73670 | 6.34300  | -14.69550 |
| H | 37.59160 | -2.98730 | -16.20060 |
| H | 33.84160 | -0.91560 | -17.24130 |
| H | 33.47100 | -3.58460 | -17.62300 |
| H | 38.31680 | -3.53040 | -20.02370 |

|   |          |          |           |
|---|----------|----------|-----------|
| H | 38.57650 | -1.12600 | -18.80230 |
| H | 36.37990 | 0.36220  | -19.40810 |
| H | 34.78210 | -1.12810 | -21.00970 |
| H | 36.97870 | -0.82020 | -12.36880 |
| H | 38.16360 | 2.04630  | -15.33220 |
| H | 38.31220 | 3.10670  | -11.13990 |
| H | 53.16920 | 32.51250 | -8.50410  |
| H | 49.80740 | 34.53520 | -6.49240  |
| H | 50.62090 | 36.10020 | -8.55610  |
| H | 55.65330 | 35.28930 | -6.57470  |
| H | 54.46960 | 33.22560 | -5.27900  |
| H | 52.19810 | 34.16200 | -4.12030  |
| H | 51.97260 | 36.79840 | -4.72890  |
| H | 49.14080 | 29.83410 | -7.45220  |
| H | 49.52490 | 31.10780 | -3.37070  |
| H | 47.73930 | 27.27140 | -4.26700  |
| H | 34.88290 | -2.45510 | 2.08800   |
| H | 35.97930 | -1.31580 | 6.08220   |
| H | 37.62990 | 0.82230  | 2.76850   |
| H | 32.42110 | -1.11480 | 5.46320   |
| H | 32.19940 | 0.98620  | 6.76220   |
| H | 35.09470 | -2.69350 | 8.42630   |
| H | 34.74330 | -2.19270 | 10.99690  |
| H | 36.29570 | -2.11420 | 10.15990  |
| H | 35.57140 | -0.24020 | 12.45750  |
| H | 36.33740 | -1.77740 | 12.75170  |
| H | 38.32370 | -2.26490 | 11.46100  |
| H | 39.38750 | -0.92270 | 11.14040  |
| H | 38.33900 | -1.51530 | 13.96250  |
| H | 39.83740 | -2.16500 | 13.32210  |
| H | 32.09980 | 2.91650  | 9.62470   |
| H | 31.44600 | 1.38990  | 9.10270   |
| H | 31.30050 | 1.36880  | 11.47830  |
| H | 32.62910 | 0.28150  | 11.11500  |
| H | 32.08850 | 1.75120  | 13.57420  |
| H | 33.54970 | 0.79510  | 13.39520  |
| H | 33.46600 | 3.83670  | 13.75590  |
| H | 33.63850 | 2.75720  | 15.10390  |
| H | 35.83060 | 2.38130  | 15.74310  |
| H | 35.49980 | 0.98980  | 14.72770  |
| H | 37.89960 | 1.19530  | 15.02100  |
| H | 37.50650 | 1.45660  | 13.35650  |
| H | 39.58160 | -0.16900 | 15.62170  |
| H | 40.96580 | -1.05430 | 15.01840  |
| H | 41.70280 | 1.04680  | 16.08230  |
| H | 42.13530 | 0.99140  | 14.40300  |
| H | 36.94710 | 4.48140  | 16.42360  |
| H | 38.05630 | 4.90270  | 18.59230  |
| H | 40.36280 | 4.08530  | 18.99640  |
| H | 41.57670 | 2.85600  | 17.25040  |
| H | 35.72430 | 7.84050  | 11.26290  |
| H | 37.37070 | 8.12800  | 11.70860  |
| H | 36.52110 | 6.72700  | 9.09800   |
| H | 36.87820 | 8.42970  | 9.24950   |
| H | 38.16200 | 7.27760  | 9.50660   |
| H | 35.68420 | 4.58860  | 9.95270   |
| H | 35.37760 | 3.69010  | 11.42600  |
| H | 34.04320 | 6.32170  | 10.59030  |
| H | 33.32220 | 4.72670  | 10.64280  |

|   |          |          |          |
|---|----------|----------|----------|
| H | 33.76100 | 5.51990  | 12.13420 |
| H | 35.33240 | 5.21290  | 13.91030 |
| H | 36.89880 | 5.62990  | 14.47120 |
| H | 34.75740 | 7.56520  | 13.40060 |
| H | 35.22690 | 7.34610  | 15.06930 |
| H | 36.35810 | 8.08410  | 13.95330 |
| H | 41.72930 | 5.97020  | 13.25240 |
| H | 41.05560 | 4.72960  | 14.26300 |
| H | 43.44700 | 4.37770  | 12.34670 |
| H | 43.54280 | 4.64720  | 14.07390 |
| H | 42.86300 | 3.16060  | 13.47980 |
| H | 41.25770 | 2.10660  | 12.41970 |
| H | 39.59840 | 1.99660  | 12.03510 |
| H | 40.99430 | 0.86850  | 10.34100 |
| H | 40.32560 | 2.25030  | 9.50540  |
| H | 41.98230 | 2.28340  | 10.09890 |
| H | 42.35480 | 4.76300  | 10.36580 |
| H | 40.93430 | 4.70160  | 9.40290  |
| H | 41.82600 | 7.03830  | 11.19710 |
| H | 41.80640 | 7.00730  | 9.44910  |
| H | 40.28860 | 7.03890  | 10.33450 |
| H | 38.73220 | -2.73470 | -5.10120 |
| H | 40.27480 | -2.47100 | -5.76520 |
| H | 40.10130 | -0.04070 | -4.49590 |
| H | 39.14540 | -1.06340 | -3.40140 |
| H | 40.76290 | -1.49770 | -3.80630 |
| H | 38.90290 | -1.81900 | -9.32580 |
| H | 39.88200 | -2.74100 | -8.25020 |
| H | 37.99920 | -4.12120 | -8.98040 |
| H | 37.87090 | -3.87340 | -7.25740 |
| H | 36.82290 | -2.97820 | -8.37190 |
| H | 39.73880 | 0.91350  | -8.23590 |
| H | 39.92640 | 1.17310  | -6.52360 |
| H | 41.52470 | -0.85980 | -8.19480 |
| H | 42.11450 | 0.68500  | -7.61500 |
| H | 41.74920 | -0.58790 | -6.47070 |
| H | 33.96670 | 2.44090  | -6.35520 |
| H | 35.12440 | 2.07700  | -5.13410 |
| H | 35.83570 | 4.03290  | -6.51790 |
| H | 37.00000 | 2.74150  | -6.76550 |
| H | 35.76240 | 3.07890  | -7.98400 |
| H | 34.71160 | 1.20720  | -9.24430 |
| H | 34.42590 | -0.52460 | -9.20310 |
| H | 32.36230 | 0.83930  | -9.58700 |
| H | 32.20260 | -0.11830 | -8.14090 |
| H | 32.54100 | 1.60980  | -8.02530 |
| H | 34.13190 | -0.80370 | -4.86150 |
| H | 32.91630 | -0.40090 | -5.98200 |
| H | 33.25300 | -2.86890 | -5.89050 |
| H | 33.47080 | -2.24950 | -7.50510 |
| H | 34.87200 | -2.71180 | -6.55110 |
| H | 39.61880 | 10.28890 | 13.70180 |
| H | 41.92490 | 11.04290 | 17.26240 |
| H | 40.86550 | 7.02560  | 16.28640 |
| H | 43.51200 | 24.31650 | 12.26000 |
| H | 45.12070 | 26.62040 | 9.01880  |
| H | 46.17260 | 22.48170 | 9.37470  |
| H | 41.89480 | 28.32250 | 9.51250  |
| H | 41.83000 | 29.26960 | 7.21870  |

|   |          |          |          |
|---|----------|----------|----------|
| H | 46.10960 | 29.13310 | 9.74230  |
| H | 46.85730 | 32.01220 | 7.69500  |
| H | 47.20400 | 30.86790 | 8.96770  |
| H | 49.31410 | 31.42950 | 7.76270  |
| H | 48.91490 | 29.73980 | 7.61990  |
| H | 47.51080 | 32.50270 | 5.49440  |
| H | 49.18320 | 32.79510 | 5.92920  |
| H | 48.99530 | 33.12560 | 3.52270  |
| H | 49.98720 | 31.74880 | 3.85360  |
| H | 44.44230 | 32.06410 | 6.61120  |
| H | 45.38370 | 31.47380 | 5.25180  |
| H | 42.42260 | 32.21540 | 5.07510  |
| H | 43.71550 | 33.36840 | 4.79870  |
| H | 41.74410 | 32.69600 | 2.94390  |
| H | 43.10620 | 33.70900 | 2.50630  |
| H | 42.48830 | 31.02540 | 1.14780  |
| H | 41.81050 | 32.54480 | 0.62710  |
| H | 43.16160 | 32.12150 | -1.53100 |
| H | 42.96700 | 33.73060 | -0.85990 |
| H | 44.74970 | 33.74900 | -2.53390 |
| H | 45.36410 | 34.16580 | -0.94620 |
| H | 46.17170 | 31.23400 | 2.43900  |
| H | 46.55850 | 32.63060 | 3.39050  |
| H | 46.37370 | 33.21610 | 0.99800  |
| H | 48.01280 | 33.50240 | 1.53200  |
| H | 46.83120 | 33.65070 | -3.73020 |
| H | 49.12980 | 34.53080 | -3.94070 |
| H | 50.79250 | 34.13950 | -2.12280 |
| H | 50.14780 | 32.86660 | -0.11170 |
| H | 50.57820 | 26.99240 | 3.37800  |
| H | 51.97010 | 27.80920 | 2.82590  |
| H | 51.09200 | 28.62070 | 5.07490  |
| H | 51.45080 | 29.86750 | 3.91190  |
| H | 49.79200 | 29.42840 | 4.21760  |
| H | 50.87560 | 27.67070 | -0.91080 |
| H | 52.06760 | 27.42080 | 0.30750  |
| H | 50.74080 | 25.48960 | 1.27610  |
| H | 49.60260 | 25.65920 | -0.07960 |
| H | 51.27620 | 25.24410 | -0.36910 |
| H | 50.27380 | 30.49780 | -0.04580 |
| H | 50.19330 | 30.91460 | 1.63910  |
| H | 52.43560 | 31.40440 | 0.75210  |
| H | 52.60290 | 30.10730 | 1.91170  |
| H | 52.64570 | 29.76200 | 0.18500  |
| H | 45.37750 | 30.26680 | 0.59800  |
| H | 45.98960 | 29.77880 | -0.93770 |
| H | 43.53090 | 29.93650 | -0.95380 |
| H | 44.02520 | 28.31060 | -1.34010 |
| H | 43.38970 | 28.69470 | 0.26460  |
| H | 44.23100 | 27.06010 | 1.85900  |
| H | 45.51010 | 26.77550 | 2.94810  |
| H | 44.02050 | 29.42040 | 2.45570  |
| H | 43.99720 | 28.44620 | 3.89650  |
| H | 45.41990 | 29.37430 | 3.49570  |
| H | 45.01290 | 26.39450 | -0.62050 |
| H | 46.59510 | 26.62840 | -1.28710 |
| H | 46.20430 | 24.31250 | -0.37890 |
| H | 47.55210 | 25.05820 | 0.43740  |
| H | 45.97250 | 24.95390 | 1.22970  |

|   |          |          |           |
|---|----------|----------|-----------|
| H | 41.31660 | 18.55200 | 16.19170  |
| H | 40.64940 | 18.06130 | 17.68130  |
| H | 43.01400 | 19.02870 | 17.85100  |
| H | 42.74430 | 17.53320 | 18.69780  |
| H | 43.63460 | 17.51270 | 17.20130  |
| H | 39.00260 | 14.83780 | 15.84420  |
| H | 38.72740 | 16.22080 | 16.84710  |
| H | 39.09720 | 17.77310 | 14.90120  |
| H | 39.31160 | 16.36080 | 13.83710  |
| H | 37.78550 | 16.65270 | 14.64070  |
| H | 41.28300 | 13.88870 | 17.70990  |
| H | 42.53310 | 15.00620 | 18.16790  |
| H | 39.55320 | 15.23710 | 18.90320  |
| H | 40.85330 | 14.72700 | 19.95830  |
| H | 40.79310 | 16.38320 | 19.40870  |
| H | 43.36890 | 16.90220 | 11.86260  |
| H | 43.66940 | 15.47930 | 10.98000  |
| H | 41.45890 | 16.42280 | 10.35690  |
| H | 41.27680 | 14.80480 | 10.99630  |
| H | 40.84990 | 16.19630 | 11.98530  |
| H | 45.67000 | 14.34110 | 13.03410  |
| H | 45.53440 | 15.88930 | 13.74210  |
| H | 45.02820 | 13.18870 | 15.15820  |
| H | 46.43240 | 14.20800 | 15.35970  |
| H | 44.88620 | 14.74590 | 15.97500  |
| H | 43.27070 | 12.34630 | 13.50840  |
| H | 41.92040 | 12.88130 | 12.51130  |
| H | 44.85610 | 12.82600 | 11.61380  |
| H | 43.63860 | 11.63740 | 11.22740  |
| H | 43.47640 | 13.26060 | 10.60100  |
| H | 46.53190 | 8.86940  | 18.22980  |
| H | 47.14320 | 9.17750  | 20.86340  |
| H | 44.82800 | 9.44640  | 22.24290  |
| H | 46.47770 | 13.68610 | 19.87220  |
| H | 46.58160 | 12.37480 | 17.51260  |
| H | 44.10720 | 11.48180 | 16.94030  |
| H | 42.46650 | 12.17280 | 19.03600  |
| H | 38.42580 | 3.92990  | 6.83240   |
| H | 37.05870 | 0.62920  | 9.22460   |
| H | 38.74330 | 5.23490  | 8.97310   |
| H | 37.37370 | 2.05840  | 11.30130  |
| H | 36.10730 | -2.84660 | -2.24490  |
| H | 37.09430 | 1.33040  | -1.99790  |
| H | 36.26550 | -2.68620 | -4.78550  |
| H | 37.24940 | 1.37270  | -4.52890  |
| H | 42.12770 | 11.53620 | -16.85440 |
| H | 40.95260 | 11.95860 | -12.74100 |
| H | 41.24490 | 9.14630  | -16.81000 |
| H | 40.10840 | 9.57110  | -12.80630 |
| H | 46.98660 | 19.97740 | -10.32470 |
| H | 47.64030 | 22.15110 | -9.20520  |
| H | 45.68420 | 24.40300 | -12.12860 |
| H | 44.97620 | 22.29090 | -13.33620 |
| H | 41.81810 | 20.05670 | 12.40600  |
| H | 41.02650 | 17.93130 | 13.52120  |
| H | 44.77970 | 17.29270 | 15.24760  |
| H | 45.69710 | 19.39570 | 14.14180  |
| H | 47.97340 | 24.26980 | 4.52630   |
| H | 46.95100 | 28.01920 | 6.34770   |

|   |          |          |           |
|---|----------|----------|-----------|
| H | 47.48870 | 29.19130 | 4.16620   |
| H | 48.47850 | 25.54160 | 2.38910   |
| H | 39.85800 | 19.54510 | -14.85370 |
| H | 39.71340 | 20.31570 | -16.41000 |
| H | 35.02320 | -3.72560 | 6.31230   |
| H | 33.31380 | -3.93450 | 6.03330   |
| H | 45.09870 | 27.98160 | 11.52240  |
| H | 43.51620 | 28.63270 | 11.84870  |

**8:**

|   |          |          |           |
|---|----------|----------|-----------|
| C | 49.43230 | 16.71580 | -16.39990 |
| C | 49.96990 | 17.11910 | -17.64490 |
| C | 50.21540 | 18.47710 | -17.94790 |
| C | 49.94020 | 19.46350 | -16.96900 |
| C | 49.38540 | 19.13430 | -15.71280 |
| C | 49.13610 | 17.74380 | -15.43590 |
| C | 49.09490 | 20.27090 | -14.78420 |
| C | 49.21340 | 15.24950 | -16.18820 |
| C | 49.08390 | 14.01800 | -16.11860 |
| C | 48.88240 | 21.30030 | -14.12690 |
| C | 48.44350 | 22.90980 | -12.91910 |
| C | 48.79000 | 12.00000 | -15.83150 |
| C | 50.88220 | 19.97460 | -21.28360 |
| C | 52.12900 | 19.37650 | -21.57440 |
| C | 52.78230 | 19.64350 | -22.79550 |
| C | 50.31860 | 20.83700 | -22.25200 |
| C | 50.95310 | 21.11180 | -23.48480 |
| C | 52.21200 | 20.50290 | -23.76810 |
| O | 50.25190 | 21.97720 | -24.30710 |
| C | 50.68410 | 22.24490 | -25.64130 |
| C | 49.64870 | 23.13980 | -26.33800 |
| O | 50.03730 | 23.42920 | -27.67850 |
| C | 49.10910 | 24.31000 | -28.31340 |
| C | 49.50420 | 24.61970 | -29.76650 |
| O | 50.72450 | 25.34350 | -29.76460 |
| O | 52.87270 | 20.78440 | -24.94590 |
| C | 53.74130 | 19.80230 | -25.50780 |
| C | 53.78260 | 19.99070 | -27.03510 |
| O | 54.65850 | 21.04010 | -27.44020 |
| C | 55.98330 | 20.59600 | -27.71560 |
| C | 56.88280 | 21.78950 | -28.06430 |
| O | 56.48350 | 22.35250 | -29.30980 |
| C | 57.37930 | 23.38170 | -29.73260 |
| C | 57.02010 | 23.84290 | -31.15070 |
| O | 55.77820 | 24.54070 | -31.11550 |
| C | 50.98930 | 26.03990 | -30.97550 |
| C | 52.36160 | 26.72020 | -30.84090 |
| O | 53.41420 | 25.76740 | -31.00350 |
| C | 55.24120 | 24.97250 | -32.31310 |
| C | 53.98080 | 25.61480 | -32.25510 |
| C | 55.87640 | 24.79460 | -33.56820 |
| C | 55.25690 | 25.23530 | -34.75090 |
| C | 53.99740 | 25.85370 | -34.69560 |
| C | 53.36050 | 26.04170 | -33.45630 |
| P | 47.06110 | 23.54080 | -14.14730 |
| P | 49.87010 | 22.33360 | -11.74660 |
| C | 49.45370 | 20.63810 | -11.01780 |

|    |          |          |           |
|----|----------|----------|-----------|
| C  | 48.20210 | 20.68640 | -10.12670 |
| C  | 51.49020 | 22.17980 | -12.71350 |
| C  | 51.86440 | 23.50500 | -13.39740 |
| C  | 50.28100 | 23.45250 | -10.26500 |
| C  | 51.40420 | 22.86560 | -9.39430  |
| C  | 45.35660 | 23.05070 | -13.50670 |
| C  | 45.23270 | 21.53070 | -13.31700 |
| C  | 47.09110 | 25.41850 | -14.35660 |
| C  | 48.42670 | 25.90070 | -14.94970 |
| C  | 47.18640 | 22.86410 | -15.92290 |
| C  | 46.17900 | 23.52740 | -16.87740 |
| P  | 46.91900 | 12.31710 | -16.20900 |
| C  | 46.17240 | 13.46030 | -14.89840 |
| C  | 46.19240 | 12.82030 | -13.50060 |
| C  | 46.71980 | 13.12760 | -17.90740 |
| C  | 47.35530 | 12.27150 | -19.01540 |
| C  | 45.79980 | 10.78140 | -16.25630 |
| C  | 44.33290 | 11.14760 | -16.53530 |
| P  | 50.68990 | 11.75170 | -15.45760 |
| C  | 50.98420 | 11.74300 | -13.59440 |
| C  | 50.52660 | 13.05240 | -12.93260 |
| C  | 51.35000 | 10.12240 | -16.15340 |
| C  | 51.25110 | 10.08050 | -17.68890 |
| C  | 51.85040 | 13.07260 | -16.19150 |
| C  | 53.33520 | 12.70870 | -16.01930 |
| O  | 50.74400 | 18.79820 | -19.18570 |
| C  | 50.15670 | 19.73960 | -19.99540 |
| C  | 47.76000 | -1.54430 | -17.44200 |
| C  | 48.45800 | -1.58960 | -16.19700 |
| C  | 49.75840 | -2.15190 | -16.39090 |
| C  | 49.91570 | -2.35070 | -17.80410 |
| C  | 48.68140 | -1.98980 | -18.44850 |
| H  | 48.51660 | -1.94820 | -19.53170 |
| C  | 48.61690 | -5.46100 | -16.21270 |
| C  | 47.95910 | -5.60560 | -17.47630 |
| C  | 46.73520 | -4.86430 | -17.42600 |
| C  | 46.63270 | -4.26930 | -16.12870 |
| C  | 47.79620 | -4.63580 | -15.37990 |
| H  | 47.97170 | -4.42950 | -14.31960 |
| Fe | 48.37350 | -3.58410 | -17.12080 |
| C  | 48.01310 | -0.94560 | -14.89330 |
| O  | 48.42840 | -1.34880 | -13.81350 |
| O  | 47.15820 | 0.09530  | -15.06980 |
| C  | 46.86360 | 0.98370  | -14.04850 |
| C  | 46.28720 | 0.58160  | -12.81670 |
| C  | 47.10390 | 2.35780  | -14.27460 |
| C  | 46.80490 | 3.33870  | -13.30140 |
| C  | 45.97010 | 1.52250  | -11.80670 |
| C  | 46.23630 | 2.90590  | -12.06180 |
| C  | 45.37490 | 1.02020  | -10.54010 |
| C  | 44.88640 | 0.50430  | -9.53070  |
| C  | 47.09950 | 4.75770  | -13.63320 |
| C  | 47.39070 | 5.89130  | -14.02560 |
| C  | 44.29360 | -0.08600 | -8.30510  |
| C  | 47.75940 | 7.24850  | -14.49900 |
| C  | 44.07310 | -1.48040 | -8.13710  |
| C  | 43.91650 | 0.74810  | -7.23190  |
| C  | 43.34700 | 0.19090  | -6.06030  |
| C  | 43.49470 | -1.99180 | -6.93410  |

|    |          |          |           |
|----|----------|----------|-----------|
| C  | 47.88120 | 8.31480  | -13.58320 |
| C  | 48.20750 | 9.61680  | -14.04010 |
| N  | 48.42140 | 9.89810  | -15.35930 |
| C  | 47.99740 | 7.55460  | -15.86550 |
| C  | 48.32580 | 8.88410  | -16.27210 |
| C  | 46.22970 | 35.63670 | -6.25330  |
| C  | 47.35390 | 34.76110 | -6.15620  |
| C  | 48.50210 | 35.49360 | -5.72040  |
| C  | 48.05490 | 36.82610 | -5.42700  |
| C  | 46.66050 | 36.91710 | -5.76770  |
| C  | 49.29370 | 36.65350 | -8.93320  |
| C  | 48.26820 | 37.62950 | -9.14810  |
| C  | 47.03580 | 36.93540 | -9.37070  |
| C  | 47.30180 | 35.53110 | -9.30230  |
| C  | 48.69600 | 35.35680 | -9.02950  |
| H  | 49.23710 | 34.40580 | -9.02060  |
| Fe | 47.80030 | 36.46800 | -7.46960  |
| C  | 47.32340 | 33.24470 | -6.26580  |
| O  | 48.32750 | 32.60940 | -6.56440  |
| O  | 46.10900 | 32.70900 | -5.97960  |
| C  | 45.94690 | 31.35800 | -5.72080  |
| C  | 46.27330 | 30.34550 | -6.65880  |
| C  | 45.37800 | 30.98550 | -4.48250  |
| C  | 45.14400 | 29.63330 | -4.14470  |
| C  | 46.06100 | 28.97480 | -6.37080  |
| C  | 45.49390 | 28.62930 | -5.10240  |
| C  | 46.43270 | 27.97250 | -7.40490  |
| C  | 46.76830 | 27.22600 | -8.32910  |
| C  | 44.54470 | 29.34580 | -2.81510  |
| C  | 44.04690 | 29.24000 | -1.69060  |
| C  | 47.14590 | 26.32140 | -9.44360  |
| C  | 43.45360 | 29.09740 | -0.33820  |
| C  | 46.51710 | 25.06650 | -9.58860  |
| C  | 48.14270 | 26.64590 | -10.40170 |
| C  | 48.49410 | 25.72340 | -11.43420 |
| C  | 46.90680 | 24.18600 | -10.62980 |
| N  | 47.88400 | 24.50240 | -11.53000 |
| C  | 42.98520 | 30.19960 | 0.42800   |
| C  | 42.40240 | 30.00110 | 1.71800   |
| N  | 42.27800 | 28.74580 | 2.24260   |
| C  | 43.32740 | 27.82020 | 0.24680   |
| C  | 42.74000 | 27.67730 | 1.52820   |
| N  | 43.14000 | -1.15160 | -5.91670  |
| C  | 40.27060 | -2.56290 | 0.26210   |
| C  | 40.03190 | -3.90610 | 0.63760   |
| C  | 39.46820 | -4.23960 | 1.89020   |
| C  | 39.10570 | -3.20250 | 2.78450   |
| C  | 39.33020 | -1.84290 | 2.47640   |
| C  | 39.91590 | -1.53280 | 1.20070   |
| C  | 38.94660 | -0.83370 | 3.50870   |
| C  | 40.87980 | -2.31230 | -1.08070  |
| C  | 41.38820 | -2.19140 | -2.20400  |
| C  | 38.60210 | -0.07360 | 4.42380   |
| C  | 38.10950 | 1.39180  | 5.78100   |
| C  | 42.23980 | -1.76960 | -4.02770  |
| C  | 39.46150 | -7.57130 | 3.53000   |
| C  | 38.56970 | -8.26810 | 2.68520   |
| C  | 38.28610 | -9.63120 | 2.91250   |
| C  | 40.04500 | -8.28020 | 4.60390   |



|   |          |           |          |
|---|----------|-----------|----------|
| C | 39.78120 | -9.64730  | 4.84480  |
| C | 38.88870 | -10.35140 | 3.97740  |
| O | 40.45080 | -10.16270 | 5.94150  |
| C | 40.39270 | -11.55400 | 6.23600  |
| C | 41.29220 | -11.90480 | 7.43010  |
| O | 41.49110 | -13.31340 | 7.45280  |
| C | 42.23440 | -13.76490 | 8.58190  |
| C | 42.68070 | -15.22160 | 8.35810  |
| O | 41.59360 | -16.14090 | 8.43280  |
| O | 38.61070 | -11.69080 | 4.19440  |
| C | 38.06140 | -12.47980 | 3.13910  |
| C | 38.36300 | -13.98040 | 3.36310  |
| O | 37.53890 | -14.64490 | 4.32330  |
| C | 36.15850 | -14.73210 | 3.96460  |
| C | 35.49400 | -15.93540 | 4.65190  |
| O | 35.66380 | -15.85520 | 6.06230  |
| C | 34.96790 | -16.90130 | 6.74220  |
| C | 35.09980 | -16.74010 | 8.26450  |
| O | 36.44110 | -17.01280 | 8.66390  |
| C | 41.33300 | -16.64690 | 9.74070  |
| C | 40.31540 | -17.79650 | 9.63510  |
| O | 39.01130 | -17.29930 | 9.32820  |
| C | 36.75850 | -16.90840 | 10.00480 |
| C | 38.12150 | -17.06330 | 10.35830 |
| C | 35.80170 | -16.64860 | 11.01810 |
| C | 36.19640 | -16.53900 | 12.36330 |
| C | 37.54940 | -16.68150 | 12.71190 |
| C | 38.50840 | -16.93850 | 11.71630 |
| P | 40.00270 | 1.65490   | 6.08120  |
| P | 36.19840 | 1.06670   | 5.54590  |
| C | 35.46210 | 2.34900   | 4.37520  |
| C | 36.16860 | 2.35080   | 3.01040  |
| C | 35.75890 | -0.63980  | 4.82410  |
| C | 34.24350 | -0.90400  | 4.82520  |
| C | 35.24930 | 1.14610   | 7.17790  |
| C | 35.73420 | 0.07220   | 8.16770  |
| C | 40.50650 | 2.89220   | 7.43410  |
| C | 42.03330 | 3.03760   | 7.54400  |
| C | 40.81900 | 0.02120   | 6.57840  |
| C | 40.15930 | -0.57700  | 7.83180  |
| C | 40.82550 | 2.26500   | 4.48950  |
| C | 40.29180 | 3.63970   | 4.05590  |
| P | 43.98730 | -1.97320  | -3.20910 |
| C | 44.22850 | -0.67530  | -1.85430 |
| C | 44.22800 | 0.75740   | -2.40940 |
| C | 44.15470 | -3.67900  | -2.40770 |
| C | 44.06690 | -4.81140  | -3.44270 |
| C | 45.48470 | -1.81430  | -4.36930 |
| C | 46.80960 | -2.02400  | -3.61830 |
| P | 40.45570 | -1.59310  | -4.76920 |
| C | 39.53010 | -0.18100  | -3.91540 |
| C | 40.19120 | 1.18380   | -4.16230 |
| C | 40.34650 | -1.24350  | -6.63460 |
| C | 38.88740 | -1.15380  | -7.11030 |
| C | 39.46290 | -3.18080  | -4.50000 |
| C | 40.06930 | -4.37200  | -5.25820 |
| O | 39.26160 | -5.57180  | 2.19940  |
| C | 39.79750 | -6.12570  | 3.33520  |
| C | 36.89970 | 10.37820  | 10.36110 |

|   |          |          |          |
|---|----------|----------|----------|
| C | 37.76740 | 9.23750  | 10.32520 |
| C | 37.35300 | 11.61050 | 10.92680 |
| C | 38.65120 | 11.67440 | 11.45000 |
| C | 39.07810 | 9.36110  | 10.84780 |
| C | 39.53150 | 10.58200 | 11.38720 |
| C | 37.40510 | 7.93260  | 9.72750  |
| C | 37.29860 | 6.81390  | 9.22250  |
| C | 36.62780 | 12.89180 | 10.98280 |
| C | 36.37590 | 14.08760 | 11.12270 |
| C | 37.33100 | 5.51270  | 8.52310  |
| C | 36.36660 | 15.55390 | 11.26610 |
| C | 37.32630 | 5.48740  | 7.11510  |
| C | 37.43500 | 4.26480  | 9.19240  |
| C | 37.57770 | 3.05310  | 8.45030  |
| C | 37.47560 | 4.26030  | 6.43000  |
| N | 37.62180 | 3.07210  | 7.08360  |
| C | 37.02590 | 16.20010 | 12.34180 |
| C | 37.18790 | 17.61220 | 12.34450 |
| N | 36.72340 | 18.35910 | 11.30420 |
| C | 35.79670 | 16.37000 | 10.26750 |
| C | 35.99040 | 17.77150 | 10.31380 |
| C | 38.48560 | 24.90030 | 9.75720  |
| C | 38.19980 | 25.91780 | 10.69650 |
| C | 38.46670 | 27.27820 | 10.42470 |
| C | 39.01760 | 27.63910 | 9.17020  |
| C | 39.34020 | 26.67000 | 8.19390  |
| C | 39.06480 | 25.29270 | 8.50090  |
| C | 39.94700 | 27.15510 | 6.91740  |
| C | 38.15880 | 23.49250 | 10.13940 |
| C | 37.84330 | 22.35940 | 10.52810 |
| C | 40.45290 | 27.65060 | 5.90150  |
| C | 41.32710 | 28.26460 | 4.14660  |
| C | 37.31270 | 20.42610 | 10.98450 |
| C | 38.52200 | 30.06930 | 12.87160 |
| C | 37.14820 | 30.11490 | 13.20050 |
| C | 36.67190 | 31.03680 | 14.15420 |
| C | 39.39450 | 30.96570 | 13.53240 |
| C | 38.93880 | 31.89030 | 14.50070 |
| C | 37.54800 | 31.93020 | 14.81770 |
| O | 39.92710 | 32.68980 | 15.05280 |
| C | 39.64850 | 33.51430 | 16.18570 |
| C | 40.94110 | 34.14260 | 16.72430 |
| O | 40.66800 | 34.92150 | 17.88870 |
| C | 41.85040 | 35.53460 | 18.40010 |
| C | 41.58000 | 36.28420 | 19.71430 |
| O | 40.79660 | 37.44920 | 19.46050 |
| O | 37.06540 | 32.85890 | 15.71440 |
| C | 35.92870 | 32.53330 | 16.50900 |
| C | 36.04850 | 33.27670 | 17.85160 |
| O | 35.75660 | 34.66670 | 17.72580 |
| C | 34.39630 | 34.98650 | 18.01210 |
| C | 34.15560 | 36.50060 | 17.91220 |
| O | 34.80410 | 37.17090 | 18.99010 |
| C | 34.43060 | 38.54570 | 19.07110 |
| C | 34.99640 | 39.17900 | 20.34880 |
| O | 36.41640 | 39.27530 | 20.26090 |
| C | 41.19370 | 38.58500 | 20.23470 |
| C | 40.42980 | 39.82520 | 19.74440 |
| O | 39.03420 | 39.66740 | 19.98000 |

|    |          |          |           |
|----|----------|----------|-----------|
| C  | 37.08980 | 39.83380 | 21.33510  |
| C  | 38.48730 | 40.01920 | 21.19730  |
| C  | 36.45970 | 40.19990 | 22.55200  |
| C  | 37.21030 | 40.72520 | 23.61840  |
| C  | 38.59810 | 40.89050 | 23.48590  |
| C  | 39.23560 | 40.54030 | 22.28290  |
| P  | 39.59610 | 28.10920 | 3.28860   |
| P  | 43.02170 | 28.40240 | 5.08510   |
| C  | 42.86500 | 29.55240 | 6.57930   |
| C  | 42.50830 | 30.98860 | 6.16590   |
| C  | 43.55560 | 26.70350 | 5.72150   |
| C  | 43.83160 | 25.70960 | 4.58280   |
| C  | 44.48150 | 29.08130 | 4.07550   |
| C  | 45.75860 | 29.18420 | 4.92490   |
| C  | 39.50340 | 28.60940 | 1.45630   |
| C  | 38.07890 | 28.45990 | 0.89770   |
| C  | 38.31910 | 29.19630 | 4.16440   |
| C  | 38.65780 | 30.69020 | 4.04010   |
| C  | 38.98520 | 26.31950 | 3.36830   |
| C  | 39.89830 | 25.35820 | 2.59160   |
| P  | 35.69800 | 21.08570 | 11.84050  |
| C  | 36.13050 | 22.37710 | 13.15360  |
| C  | 37.05330 | 21.80650 | 14.24150  |
| C  | 34.57960 | 21.91870 | 10.56740  |
| C  | 34.05130 | 20.93520 | 9.51160   |
| C  | 34.65380 | 19.77370 | 12.73090  |
| C  | 33.43270 | 20.39810 | 13.42480  |
| P  | 38.94280 | 19.85110 | 10.12210  |
| C  | 38.99340 | 20.46090 | 8.32510   |
| C  | 37.82770 | 19.89470 | 7.49920   |
| C  | 40.44210 | 20.56870 | 11.02300  |
| C  | 40.57770 | 19.98550 | 12.43880  |
| C  | 39.27890 | 17.98230 | 9.99270   |
| C  | 40.57840 | 17.68160 | 9.22800   |
| O  | 38.14230 | 28.22040 | 11.38280  |
| C  | 39.06590 | 29.12190 | 11.84800  |
| H  | 46.01250 | 37.78030 | -5.57490  |
| O  | 40.81400 | 10.73740 | 11.85770  |
| C  | 41.60080 | 11.68840 | 11.29790  |
| O  | 41.46510 | 12.13020 | 10.15590  |
| C  | 42.52880 | 12.33210 | 12.28550  |
| C  | 43.57470 | 13.23850 | 11.92650  |
| C  | 44.31930 | 13.50020 | 13.12430  |
| C  | 43.69540 | 12.78780 | 14.20760  |
| C  | 42.55820 | 12.07960 | 13.69210  |
| C  | 40.83700 | 15.73360 | 14.20500  |
| C  | 41.84020 | 16.43720 | 13.47520  |
| C  | 41.77380 | 16.01310 | 12.11670  |
| C  | 40.72250 | 15.05620 | 12.00580  |
| C  | 40.15740 | 14.86660 | 13.30070  |
| H  | 41.92530 | 11.38640 | 14.24810  |
| H  | 39.32850 | 14.20670 | 13.55870  |
| Fe | 42.30830 | 14.25510 | 13.42690  |
| N  | 38.02590 | 37.23210 | 19.30190  |
| C  | 37.73530 | 36.02550 | 20.09180  |
| C  | 37.89910 | 37.05670 | 17.84620  |
| N  | 53.93770 | 23.27290 | -29.56980 |
| C  | 53.28210 | 23.72640 | -28.33250 |
| C  | 53.05780 | 22.69330 | -30.59960 |

|   |          |           |           |
|---|----------|-----------|-----------|
| C | 56.18460 | 25.66700  | -25.75380 |
| C | 55.85940 | 26.23130  | -27.00150 |
| C | 54.90930 | 25.60740  | -27.83180 |
| C | 54.28460 | 24.40910  | -27.42100 |
| C | 54.60270 | 23.85580  | -26.16190 |
| C | 55.55340 | 24.48140  | -25.33220 |
| C | 51.86470 | 18.60060  | -29.80430 |
| C | 50.98850 | 19.65920  | -29.49590 |
| C | 51.38220 | 20.99090  | -29.73110 |
| C | 52.65250 | 21.26780  | -30.28040 |
| C | 53.53050 | 20.20460  | -30.58180 |
| C | 53.13590 | 18.87370  | -30.34510 |
| N | 38.23290 | -16.02540 | 6.90060   |
| C | 37.25330 | 36.98650  | 24.29290  |
| C | 36.12520 | 36.71900  | 23.49540  |
| C | 36.28510 | 36.40220  | 22.13290  |
| C | 37.57530 | 36.35260  | 21.56150  |
| C | 38.70390 | 36.61140  | 22.36860  |
| C | 38.54190 | 36.93180  | 23.73010  |
| C | 39.68510 | 40.39470  | 15.72840  |
| C | 38.43680 | 40.54780  | 16.36040  |
| C | 37.85260 | 39.46240  | 17.04050  |
| C | 38.51770 | 38.21870  | 17.09610  |
| C | 39.76790 | 38.06900  | 16.45790  |
| C | 40.35060 | 39.15510  | 15.77630  |
| H | 37.41730 | 37.98850  | 19.60660  |
| H | 38.97620 | 37.53610  | 19.49540  |
| H | 54.37780 | 24.08260  | -29.99730 |
| H | 54.69160 | 22.63050  | -29.34340 |
| C | 38.79420 | -14.72580 | 7.29270   |
| C | 39.16550 | -16.90360 | 6.17560   |
| C | 37.07600 | -20.40230 | 4.69770   |
| C | 37.52580 | -19.41930 | 3.79620   |
| C | 38.20930 | -18.28430 | 4.27400   |
| C | 38.44190 | -18.12810 | 5.65780   |
| C | 37.99840 | -19.12230 | 6.55720   |
| C | 37.31410 | -20.25480 | 6.07690   |
| C | 35.84810 | -12.32630 | 9.38920   |
| C | 35.84090 | -12.37640 | 7.98220   |
| C | 36.80720 | -13.14010 | 7.29950   |
| C | 37.77740 | -13.86740 | 8.02030   |
| C | 37.79560 | -13.79240 | 9.42920   |
| C | 36.82920 | -13.03030 | 10.11210  |
| H | 37.92050 | -16.50930 | 7.73890   |
| H | 37.39980 | -15.86890 | 6.33900   |
| O | 49.12420 | 20.33460  | -19.67060 |
| O | 40.23240 | 29.13710  | 11.44410  |
| O | 40.49600 | -5.47200  | 4.11560   |
| H | 50.20460 | 16.38660  | -18.40620 |
| H | 50.14920 | 20.49630  | -17.21550 |
| H | 48.71600 | 17.46530  | -14.48130 |
| H | 52.61490 | 18.72010  | -20.86820 |
| H | 53.74770 | 19.19160  | -22.97130 |
| H | 49.36630 | 21.31190  | -22.06280 |
| H | 51.64230 | 22.76440  | -25.62840 |
| H | 50.79270 | 21.31660  | -26.20380 |
| H | 48.67700 | 22.64330  | -26.33610 |
| H | 49.54020 | 24.06810  | -25.77480 |
| H | 48.11710 | 23.85530  | -28.30890 |

|   |          |          |           |
|---|----------|----------|-----------|
| H | 49.03450 | 25.24440 | -27.75450 |
| H | 49.59920 | 23.70970 | -30.35920 |
| H | 48.71320 | 25.21910 | -30.22130 |
| H | 54.73830 | 19.86570 | -25.07110 |
| H | 53.35220 | 18.80310 | -25.30560 |
| H | 54.05430 | 19.05430 | -27.52570 |
| H | 52.77830 | 20.22690 | -27.38160 |
| H | 56.39000 | 20.08470 | -26.84210 |
| H | 55.98310 | 19.88010 | -28.53950 |
| H | 56.85460 | 22.54030 | -27.27410 |
| H | 57.91370 | 21.43760 | -28.13420 |
| H | 57.35540 | 24.22340 | -29.03840 |
| H | 58.40250 | 23.00150 | -29.74270 |
| H | 57.80160 | 24.50810 | -31.52250 |
| H | 56.96970 | 22.97690 | -31.81310 |
| H | 50.96140 | 25.36880 | -31.83510 |
| H | 50.22070 | 26.79970 | -31.12690 |
| H | 52.45950 | 27.56060 | -31.52950 |
| H | 52.44990 | 27.16260 | -29.84810 |
| H | 56.84540 | 24.32800 | -33.66340 |
| H | 55.74970 | 25.10130 | -35.70480 |
| H | 53.52410 | 26.19140 | -35.60800 |
| H | 52.39350 | 26.52060 | -33.46590 |
| H | 49.32520 | 19.88460 | -11.79350 |
| H | 50.29900 | 20.28500 | -10.42510 |
| H | 47.30240 | 20.94430 | -10.68170 |
| H | 48.02550 | 19.70790 | -9.67490  |
| H | 48.31830 | 21.38980 | -9.30020  |
| H | 52.29790 | 21.90480 | -12.03430 |
| H | 51.47730 | 21.37460 | -13.44640 |
| H | 51.97940 | 24.32160 | -12.68270 |
| H | 52.82860 | 23.40680 | -13.90310 |
| H | 51.14480 | 23.80480 | -14.15880 |
| H | 50.62840 | 24.43090 | -10.59690 |
| H | 49.42730 | 23.60380 | -9.60620  |
| H | 52.34370 | 22.75770 | -9.93830  |
| H | 51.61980 | 23.52560 | -8.55100  |
| H | 51.14680 | 21.89490 | -8.96970  |
| H | 45.09340 | 23.57510 | -12.59030 |
| H | 44.60260 | 23.36880 | -14.22960 |
| H | 45.93100 | 21.13540 | -12.58230 |
| H | 44.22570 | 21.27400 | -12.97970 |
| H | 45.38680 | 20.99780 | -14.25730 |
| H | 46.29770 | 25.70840 | -15.04830 |
| H | 46.83650 | 25.96660 | -13.45300 |
| H | 48.57080 | 25.52120 | -15.96400 |
| H | 48.43480 | 26.99030 | -15.03630 |
| H | 49.30110 | 25.61570 | -14.36850 |
| H | 48.18960 | 22.99820 | -16.33060 |
| H | 46.96790 | 21.79740 | -15.95470 |
| H | 46.39260 | 24.58420 | -17.04350 |
| H | 46.21850 | 23.05560 | -17.86190 |
| H | 45.14830 | 23.44070 | -16.53190 |
| H | 46.67000 | 14.42820 | -14.86900 |
| H | 45.14030 | 13.68900 | -15.16920 |
| H | 45.71320 | 13.48390 | -12.77760 |
| H | 45.63150 | 11.88420 | -13.47570 |
| H | 47.20100 | 12.63190 | -13.13840 |
| H | 45.65990 | 13.25060 | -18.13340 |

|   |          |          |           |
|---|----------|----------|-----------|
| H | 47.11750 | 14.14050 | -17.94790 |
| H | 48.43400 | 12.16590 | -18.90210 |
| H | 46.91040 | 11.27680 | -19.07550 |
| H | 47.18880 | 12.73670 | -19.99050 |
| H | 46.10390 | 10.09820 | -17.04930 |
| H | 45.80910 | 10.23060 | -15.31700 |
| H | 43.90770 | 11.80190 | -15.77350 |
| H | 44.19840 | 11.62820 | -17.50550 |
| H | 43.71050 | 10.25020 | -16.55570 |
| H | 50.51600 | 10.88790 | -13.11090 |
| H | 52.05220 | 11.61620 | -13.40600 |
| H | 51.06770 | 13.91150 | -13.33390 |
| H | 49.46050 | 13.23670 | -13.04800 |
| H | 50.73840 | 13.02700 | -11.86130 |
| H | 52.40420 | 10.02530 | -15.88650 |
| H | 50.90500 | 9.23810  | -15.70370 |
| H | 50.25070 | 10.25880 | -18.07760 |
| H | 51.91210 | 10.81820 | -18.14960 |
| H | 51.58070 | 9.10970  | -18.06780 |
| H | 51.64830 | 13.23410 | -17.25150 |
| H | 51.72570 | 14.03200 | -15.69190 |
| H | 53.60550 | 12.51970 | -14.97970 |
| H | 53.62430 | 11.83620 | -16.60700 |
| H | 53.97260 | 13.52580 | -16.36430 |
| H | 46.77790 | -1.09660 | -17.62170 |
| H | 50.54580 | -2.23620 | -15.63420 |
| H | 50.84630 | -2.62890 | -18.31340 |
| H | 49.51770 | -6.00050 | -15.89830 |
| H | 48.26970 | -6.27580 | -18.28700 |
| H | 45.95490 | -4.87240 | -18.19550 |
| H | 45.75940 | -3.73700 | -15.74140 |
| H | 46.09060 | -0.46830 | -12.64910 |
| H | 47.53010 | 2.65450  | -15.22340 |
| H | 46.00070 | 3.63820  | -11.30450 |
| H | 44.35330 | -2.15510 | -8.94490  |
| H | 44.07300 | 1.81890  | -7.32910  |
| H | 43.05310 | 0.82010  | -5.23450  |
| H | 43.31810 | -3.05000 | -6.78950  |
| H | 47.71220 | 8.11240  | -12.52890 |
| H | 48.27310 | 10.44310 | -13.34870 |
| H | 47.91780 | 6.75580  | -16.60170 |
| H | 48.48260 | 9.13090  | -17.31290 |
| H | 45.19950 | 35.35020 | -6.48520  |
| H | 49.48360 | 35.07260 | -5.47740  |
| H | 48.64550 | 37.60650 | -4.93200  |
| H | 50.36590 | 36.86480 | -8.84910  |
| H | 48.42500 | 38.70920 | -9.25980  |
| H | 46.09180 | 37.39880 | -9.67900  |
| H | 46.58900 | 34.73750 | -9.54320  |
| H | 46.69500 | 30.63260 | -7.61210  |
| H | 45.11870 | 31.76710 | -3.78130  |
| H | 45.32340 | 27.59020 | -4.86450  |
| H | 45.73930 | 24.79260 | -8.88040  |
| H | 48.64380 | 27.61010 | -10.32760 |
| H | 49.27500 | 25.95000 | -12.14670 |
| H | 46.45300 | 23.21100 | -10.72560 |
| H | 43.07460 | 31.20180 | 0.01100   |
| H | 42.02970 | 30.82710 | 2.31010   |
| H | 43.68600 | 26.95830 | -0.30920  |

|   |          |           |          |
|---|----------|-----------|----------|
| H | 42.62660 | 26.70380  | 1.97960  |
| H | 40.28540 | -4.71880  | -0.03060 |
| H | 38.66550 | -3.47960  | 3.73390  |
| H | 40.09330 | -0.50020  | 0.94180  |
| H | 38.08050 | -7.77460  | 1.85890  |
| H | 37.58150 | -10.11480 | 2.25240  |
| H | 40.72720 | -7.77700  | 5.27470  |
| H | 39.37030 | -11.84640 | 6.47240  |
| H | 40.73140 | -12.12040 | 5.36720  |
| H | 42.25850 | -11.40940 | 7.32520  |
| H | 40.83940 | -11.55710 | 8.36010  |
| H | 43.12580 | -13.14660 | 8.70130  |
| H | 41.64790 | -13.66460 | 9.49610  |
| H | 43.12880 | -15.30540 | 7.36750  |
| H | 43.46820 | -15.49250 | 9.06360  |
| H | 36.99360 | -12.29150 | 3.02900  |
| H | 38.53720 | -12.20030 | 2.19780  |
| H | 38.27660 | -14.51240 | 2.41420  |
| H | 39.40360 | -14.09470 | 3.66810  |
| H | 35.64580 | -13.81080 | 4.24260  |
| H | 36.04210 | -14.84970 | 2.88580  |
| H | 34.43160 | -15.94390 | 4.40160  |
| H | 35.91230 | -16.86730 | 4.27400  |
| H | 33.90930 | -16.86400 | 6.47910  |
| H | 35.33870 | -17.87940 | 6.43170  |
| H | 34.80290 | -15.73220 | 8.56010  |
| H | 34.42450 | -17.44810 | 8.74820  |
| H | 42.25420 | -17.04310 | 10.17130 |
| H | 40.97580 | -15.85790 | 10.40320 |
| H | 40.61980 | -18.47190 | 8.83500  |
| H | 40.31840 | -18.41630 | 10.53250 |
| H | 34.75090 | -16.53610 | 10.79880 |
| H | 35.45800 | -16.35470 | 13.13170 |
| H | 37.84940 | -16.60440 | 13.74820 |
| H | 39.53540 | -17.03790 | 12.03190 |
| H | 34.40730 | 2.11620   | 4.21560  |
| H | 35.45710 | 3.34760   | 4.80790  |
| H | 37.22300 | 2.61050   | 3.07860  |
| H | 36.08540 | 1.38020   | 2.51770  |
| H | 35.69680 | 3.07640   | 2.34380  |
| H | 36.07500 | -0.72230  | 3.78500  |
| H | 36.25270 | -1.44210  | 5.37450  |
| H | 33.67950 | -0.13300  | 4.29900  |
| H | 34.01870 | -1.84960  | 4.32700  |
| H | 33.83470 | -0.99240  | 5.83290  |
| H | 35.24100 | 2.13220   | 7.63600  |
| H | 34.19150 | 0.96130   | 6.98070  |
| H | 36.79760 | 0.12030   | 8.39250  |
| H | 35.19770 | 0.15790   | 9.11630  |
| H | 35.52380 | -0.93390  | 7.79760  |
| H | 40.11310 | 3.89160   | 7.25460  |
| H | 40.15840 | 2.56410   | 8.41360  |
| H | 42.52500 | 2.10200   | 7.81460  |
| H | 42.49060 | 3.40700   | 6.62580  |
| H | 42.29370 | 3.75120   | 8.32890  |
| H | 40.82760 | -0.71640  | 5.77730  |
| H | 41.87470 | 0.18850   | 6.79400  |
| H | 39.11790 | -0.85400  | 7.66970  |
| H | 40.68040 | -1.49070  | 8.12950  |

|   |          |          |          |
|---|----------|----------|----------|
| H | 40.21340 | 0.09540  | 8.68970  |
| H | 41.90250 | 2.33580  | 4.64890  |
| H | 40.71270 | 1.55090  | 3.67550  |
| H | 40.43780 | 4.39480  | 4.83050  |
| H | 40.83380 | 3.99270  | 3.17610  |
| H | 39.23740 | 3.61360  | 3.78810  |
| H | 43.48250 | -0.76910 | -1.06640 |
| H | 45.18110 | -0.85860 | -1.35400 |
| H | 45.00130 | 0.90090  | -3.16610 |
| H | 43.26640 | 1.04280  | -2.82860 |
| H | 44.44810 | 1.46700  | -1.60880 |
| H | 45.11800 | -3.74970 | -1.90010 |
| H | 43.42500 | -3.85020 | -1.61780 |
| H | 44.20420 | -5.77860 | -2.95200 |
| H | 43.10300 | -4.85270 | -3.94470 |
| H | 44.85180 | -4.74270 | -4.19770 |
| H | 45.45240 | -2.55880 | -5.16500 |
| H | 45.54670 | -0.83160 | -4.83370 |
| H | 46.96050 | -1.30040 | -2.81630 |
| H | 46.89200 | -3.02360 | -3.18800 |
| H | 47.65890 | -1.91720 | -4.29680 |
| H | 38.50640 | -0.14960 | -4.29270 |
| H | 39.42230 | -0.35390 | -2.84560 |
| H | 40.26340 | 1.41430  | -5.22670 |
| H | 39.58580 | 1.97690  | -3.71800 |
| H | 41.18080 | 1.25500  | -3.71790 |
| H | 40.81830 | -0.30130 | -6.90860 |
| H | 40.81820 | -2.03540 | -7.21640 |
| H | 38.84270 | -0.94750 | -8.18200 |
| H | 38.34140 | -2.08690 | -6.96010 |
| H | 38.32990 | -0.35640 | -6.61750 |
| H | 39.35340 | -3.43860 | -3.44770 |
| H | 38.43900 | -3.03450 | -4.84780 |
| H | 41.07600 | -4.61800 | -4.92820 |
| H | 39.46130 | -5.26640 | -5.09920 |
| H | 40.08670 | -4.20840 | -6.33710 |
| H | 35.90010 | 10.30990 | 9.95550  |
| H | 39.00210 | 12.59840 | 11.88300 |
| H | 39.75710 | 8.52040  | 10.82610 |
| H | 37.23370 | 6.42860  | 6.57920  |
| H | 37.42880 | 4.25240  | 10.28210 |
| H | 37.70570 | 2.10080  | 8.94610  |
| H | 37.52490 | 4.23510  | 5.35220  |
| H | 37.45520 | 15.59800 | 13.13970 |
| H | 37.75520 | 18.11830 | 13.11470 |
| H | 35.25330 | 15.89790 | 9.45230  |
| H | 35.62590 | 18.41040 | 9.52380  |
| H | 37.76700 | 25.67420 | 11.65790 |
| H | 39.20130 | 28.68830 | 8.97790  |
| H | 39.29680 | 24.53440 | 7.76900  |
| H | 36.43300 | 29.46500 | 12.71940 |
| H | 35.61120 | 31.06890 | 14.35710 |
| H | 40.45100 | 30.95640 | 13.30440 |
| H | 38.96520 | 34.31710 | 15.90710 |
| H | 39.19210 | 32.92140 | 16.97910 |
| H | 41.65510 | 33.35360 | 16.96580 |
| H | 41.39400 | 34.76730 | 15.95260 |
| H | 42.59970 | 34.76440 | 18.59120 |
| H | 42.27790 | 36.21820 | 17.66470 |



|   |          |          |          |
|---|----------|----------|----------|
| H | 41.07920 | 35.63590 | 20.43260 |
| H | 42.54440 | 36.54600 | 20.15440 |
| H | 35.00490 | 32.79290 | 15.99120 |
| H | 35.90520 | 31.46220 | 16.71630 |
| H | 35.40730 | 32.80930 | 18.60140 |
| H | 37.06580 | 33.17240 | 18.22950 |
| H | 33.74690 | 34.46990 | 17.30400 |
| H | 34.12050 | 34.64520 | 19.01160 |
| H | 34.49910 | 36.88770 | 16.95180 |
| H | 33.07980 | 36.67880 | 17.96310 |
| H | 34.76360 | 39.09080 | 18.18760 |
| H | 33.34280 | 38.62960 | 19.10480 |
| H | 34.57350 | 40.17820 | 20.46850 |
| H | 34.69040 | 38.58390 | 21.20980 |
| H | 41.02390 | 38.41070 | 21.29770 |
| H | 42.26130 | 38.77020 | 20.10430 |
| H | 40.82500 | 40.74740 | 20.17000 |
| H | 40.57670 | 39.93080 | 18.67000 |
| H | 35.39830 | 40.08550 | 22.70870 |
| H | 36.72040 | 41.00100 | 24.54230 |
| H | 39.17220 | 41.29560 | 24.30810 |
| H | 40.30180 | 40.69260 | 22.23150 |
| H | 42.14730 | 29.19540 | 7.31660  |
| H | 43.81190 | 29.57490 | 7.12100  |
| H | 43.25720 | 31.42620 | 5.50360  |
| H | 41.53380 | 31.06180 | 5.68880  |
| H | 42.47190 | 31.63290 | 7.04820  |
| H | 44.46400 | 26.81810 | 6.31600  |
| H | 42.82630 | 26.28390 | 6.41310  |
| H | 44.21420 | 24.77220 | 4.99280  |
| H | 42.93770 | 25.46410 | 4.01530  |
| H | 44.59770 | 26.07770 | 3.89800  |
| H | 44.72820 | 28.44610 | 3.22640  |
| H | 44.27200 | 30.08130 | 3.69520  |
| H | 46.07550 | 28.22260 | 5.33050  |
| H | 46.59210 | 29.55830 | 4.32610  |
| H | 45.65080 | 29.88010 | 5.75880  |
| H | 39.78600 | 29.65250 | 1.31440  |
| H | 40.14810 | 27.99980 | 0.82560  |
| H | 37.71110 | 27.43450 | 0.94590  |
| H | 37.35980 | 29.09930 | 1.41250  |
| H | 38.04460 | 28.75320 | -0.15390 |
| H | 37.33330 | 29.02720 | 3.72850  |
| H | 38.19490 | 28.94060 | 5.21550  |
| H | 38.66520 | 31.02660 | 3.00190  |
| H | 37.89720 | 31.29080 | 4.54570  |
| H | 39.61120 | 30.94940 | 4.49470  |
| H | 38.86880 | 25.97380 | 4.39430  |
| H | 37.97990 | 26.26880 | 2.94670  |
| H | 39.99120 | 25.64380 | 1.54240  |
| H | 40.89240 | 25.28570 | 3.02610  |
| H | 39.47420 | 24.35180 | 2.59960  |
| H | 36.56700 | 23.28040 | 12.73010 |
| H | 35.21250 | 22.72510 | 13.63000 |
| H | 37.21060 | 22.55080 | 15.02630 |
| H | 36.61980 | 20.93440 | 14.73430 |
| H | 38.03800 | 21.54300 | 13.86140 |
| H | 33.72790 | 22.36750 | 11.08290 |
| H | 35.07990 | 22.75410 | 10.07860 |

|   |          |           |           |
|---|----------|-----------|-----------|
| H | 34.83690 | 20.52750  | 8.88110   |
| H | 33.49440 | 20.11230  | 9.96370   |
| H | 33.34850 | 21.44580  | 8.84870   |
| H | 34.26240 | 19.02520  | 12.04330  |
| H | 35.23020 | 19.25320  | 13.49630  |
| H | 32.77990 | 20.93050  | 12.73140  |
| H | 32.81910 | 19.62640  | 13.89550  |
| H | 33.71080 | 21.08970  | 14.22180  |
| H | 39.01020 | 21.54560  | 8.24680   |
| H | 39.93210 | 20.14720  | 7.86850   |
| H | 37.91900 | 20.19920  | 6.45460   |
| H | 37.81360 | 18.80350  | 7.50410   |
| H | 36.86170 | 20.25570  | 7.84740   |
| H | 41.35210 | 20.34690  | 10.46450  |
| H | 40.40960 | 21.65550  | 11.08540  |
| H | 40.73620 | 18.90580  | 12.42400  |
| H | 41.44680 | 20.41280  | 12.94460  |
| H | 39.71570 | 20.19240  | 13.07000  |
| H | 39.39970 | 17.53280  | 10.97810  |
| H | 38.48410 | 17.44630  | 9.47800   |
| H | 40.77610 | 16.60760  | 9.22960   |
| H | 40.53440 | 17.98580  | 8.18250   |
| H | 41.44810 | 18.15290  | 9.68770   |
| H | 43.82860 | 13.56580  | 10.91890  |
| H | 45.25040 | 14.06540  | 13.19150  |
| H | 44.07570 | 12.72330  | 15.22960  |
| H | 40.61280 | 15.85810  | 15.26690  |
| H | 42.51650 | 17.18960  | 13.88530  |
| H | 42.40340 | 16.37390  | 11.30400  |
| H | 40.40710 | 14.55850  | 11.08880  |
| H | 36.81190 | 35.56850  | 19.74300  |
| H | 38.52990 | 35.29080  | 19.95560  |
| H | 38.38190 | 36.12840  | 17.54170  |
| H | 36.85360 | 36.97470  | 17.56250  |
| H | 52.49860 | 24.44210  | -28.55410 |
| H | 52.81230 | 22.88210  | -27.82830 |
| H | 52.17870 | 23.31980  | -30.75110 |
| H | 53.59450 | 22.69030  | -31.54950 |
| H | 56.91900 | 26.14900  | -25.12320 |
| H | 56.34200 | 27.14490  | -27.32300 |
| H | 54.67660 | 26.06060  | -28.78560 |
| H | 54.13130 | 22.94280  | -25.82890 |
| H | 55.80560 | 24.05150  | -24.37390 |
| H | 51.55520 | 17.57660  | -29.64910 |
| H | 50.00480 | 19.44770  | -29.10170 |
| H | 50.69110 | 21.79130  | -29.51210 |
| H | 54.50030 | 20.39660  | -31.02140 |
| H | 53.80040 | 18.05980  | -30.60220 |
| H | 37.13010 | 37.23670  | 25.33810  |
| H | 35.13780 | 36.76370  | 23.93440  |
| H | 35.40580 | 36.20720  | 21.53500  |
| H | 39.70130 | 36.57580  | 21.96190  |
| H | 39.40310 | 37.14090  | 24.35000  |
| H | 40.13350 | 41.23430  | 15.21460  |
| H | 37.93250 | 41.50450  | 16.33120  |
| H | 36.90270 | 39.60780  | 17.53330  |
| H | 40.29470 | 37.12790  | 16.49590  |
| H | 41.31310 | 39.04660  | 15.29710  |
| H | 39.63660 | -14.89060 | 7.95530   |

|   |          |           |          |
|---|----------|-----------|----------|
| H | 39.16350 | -14.20040 | 6.41290  |
| H | 39.61230 | -16.36140 | 5.34140  |
| H | 39.98310 | -17.21710 | 6.82250  |
| H | 36.55880 | -21.27920 | 4.33140  |
| H | 37.35100 | -19.54850 | 2.73700  |
| H | 38.55160 | -17.54270 | 3.56680  |
| H | 38.17500 | -19.03550 | 7.62030  |
| H | 36.97770 | -21.01960 | 6.76430  |
| H | 35.09770 | -11.75520 | 9.91780  |
| H | 35.08350 | -11.83970 | 7.42960  |
| H | 36.78730 | -13.17280 | 6.22170  |
| H | 38.53500 | -14.33410 | 10.00260 |
| H | 36.83180 | -12.99900 | 11.19340 |

## 9:

|   |          |          |           |
|---|----------|----------|-----------|
| C | 44.26160 | 13.93440 | -16.17310 |
| C | 44.51040 | 13.86660 | -17.56020 |
| C | 45.16850 | 14.90090 | -18.25530 |
| C | 45.59780 | 16.04530 | -17.53590 |
| C | 45.38530 | 16.15940 | -16.14050 |
| C | 44.70870 | 15.09380 | -15.46430 |
| C | 45.88900 | 17.38020 | -15.45960 |
| C | 43.55280 | 12.78670 | -15.55270 |
| C | 42.96000 | 11.76750 | -15.19010 |
| C | 46.35980 | 18.42710 | -15.00740 |
| C | 48.77740 | 23.84080 | -12.30120 |
| C | 39.89640 | 6.40480  | -13.09860 |
| C | 46.04710 | 15.34300 | -21.87990 |
| C | 46.71480 | 14.14130 | -22.18180 |
| C | 46.95980 | 13.78380 | -23.52200 |
| C | 45.62340 | 16.17040 | -22.94330 |
| C | 45.85440 | 15.82810 | -24.29630 |
| C | 46.55380 | 14.61960 | -24.59080 |
| O | 45.38640 | 16.75040 | -25.21770 |
| C | 45.43750 | 16.48070 | -26.61850 |
| C | 44.82760 | 17.65990 | -27.38610 |
| O | 44.70740 | 17.37260 | -28.77940 |
| C | 44.31430 | 18.53350 | -29.51100 |
| C | 43.66030 | 18.18030 | -30.85410 |
| O | 44.61700 | 17.72850 | -31.80910 |
| O | 46.81630 | 14.25150 | -25.89150 |
| C | 48.10780 | 13.71940 | -26.17780 |
| C | 48.55800 | 14.20800 | -27.56760 |
| O | 47.88730 | 13.53490 | -28.63080 |
| C | 48.53250 | 12.31970 | -29.00980 |
| C | 47.81920 | 11.68350 | -30.20790 |
| O | 48.00150 | 12.51870 | -31.34370 |
| C | 47.48260 | 11.94480 | -32.53700 |
| C | 47.95120 | 12.77200 | -33.73760 |
| O | 47.28550 | 14.03460 | -33.78350 |
| C | 44.01640 | 17.57110 | -33.09860 |
| C | 45.08280 | 17.48820 | -34.19610 |
| O | 45.80500 | 16.26550 | -34.09200 |
| C | 47.56270 | 14.84530 | -34.87250 |
| C | 46.79450 | 16.02610 | -35.02620 |
| C | 48.58560 | 14.56000 | -35.81570 |
| C | 48.84330 | 15.43170 | -36.88750 |

|    |          |          |           |
|----|----------|----------|-----------|
| C  | 48.08590 | 16.60310 | -37.03420 |
| C  | 47.06880 | 16.89910 | -36.11120 |
| P  | 46.98550 | 24.58180 | -12.35340 |
| P  | 50.59210 | 23.12560 | -12.33270 |
| C  | 51.08230 | 22.60050 | -10.58560 |
| C  | 50.18180 | 21.49650 | -10.01360 |
| C  | 50.95640 | 21.64740 | -13.46720 |
| C  | 51.08960 | 22.04630 | -14.95020 |
| C  | 51.84360 | 24.45400 | -12.86660 |
| C  | 53.29380 | 23.94800 | -12.77160 |
| C  | 46.29580 | 24.68810 | -10.59620 |
| C  | 46.11440 | 23.30030 | -9.96210  |
| C  | 47.06070 | 26.33930 | -13.04550 |
| C  | 47.66740 | 26.36050 | -14.45810 |
| C  | 45.66530 | 23.68540 | -13.38890 |
| C  | 44.29760 | 24.38190 | -13.29800 |
| P  | 38.14150 | 7.18950  | -13.43150 |
| C  | 37.35060 | 7.69520  | -11.79110 |
| C  | 38.14580 | 8.78480  | -11.05730 |
| C  | 38.05460 | 8.72360  | -14.54650 |
| C  | 38.15730 | 8.38540  | -16.04690 |
| C  | 36.96480 | 5.94080  | -14.25360 |
| C  | 35.53840 | 6.50140  | -14.39170 |
| P  | 41.60840 | 5.55000  | -12.72560 |
| C  | 41.91560 | 5.53440  | -10.86030 |
| C  | 42.02930 | 6.94550  | -10.26530 |
| C  | 41.62590 | 3.73770  | -13.30570 |
| C  | 42.91380 | 3.01070  | -12.88000 |
| C  | 43.17010 | 6.30440  | -13.49910 |
| C  | 43.35200 | 5.92740  | -14.98280 |
| C  | 35.31380 | -3.09500 | -12.60720 |
| C  | 34.80760 | -1.80320 | -12.94140 |
| C  | 33.48100 | -1.92470 | -13.45810 |
| C  | 33.09960 | -3.29900 | -13.29700 |
| C  | 34.23360 | -4.02170 | -12.78820 |
| H  | 34.23310 | -5.07490 | -12.48180 |
| C  | 35.00080 | -4.02670 | -16.57360 |
| C  | 36.22830 | -4.00230 | -15.83700 |
| C  | 36.52410 | -2.63940 | -15.51840 |
| C  | 35.47550 | -1.82250 | -16.04850 |
| C  | 34.53220 | -2.67940 | -16.69880 |
| H  | 33.68040 | -2.35660 | -17.30870 |
| Fe | 34.66530 | -3.21690 | -14.67500 |
| C  | 35.44730 | -0.46650 | -12.58850 |
| O  | 35.19510 | 0.55600  | -13.21650 |
| O  | 36.25910 | -0.52230 | -11.49210 |
| C  | 36.67190 | 0.61380  | -10.80900 |
| C  | 36.46060 | 0.65160  | -9.41050  |
| C  | 37.32440 | 1.70990  | -11.43460 |
| C  | 37.74700 | 2.84700  | -10.70010 |
| C  | 36.86030 | 1.75160  | -8.61520  |
| C  | 37.50490 | 2.85170  | -9.28140  |
| C  | 36.58200 | 1.68620  | -7.14350  |
| C  | 36.30420 | 1.54440  | -5.94240  |
| C  | 38.41660 | 3.96210  | -11.44700 |
| C  | 38.96170 | 4.83840  | -12.13600 |
| C  | 53.13220 | 33.34970 | -10.92860 |
| C  | 53.69730 | 32.04680 | -11.07030 |
| C  | 55.11490 | 32.15020 | -11.21740 |

|    |          |           |           |
|----|----------|-----------|-----------|
| C  | 55.45200 | 33.52960  | -11.00810 |
| C  | 54.23000 | 34.26970  | -10.84650 |
| C  | 52.74060 | 32.78830  | -14.04070 |
| C  | 53.88470 | 31.95200  | -14.23990 |
| C  | 54.97650 | 32.78390  | -14.64370 |
| C  | 54.50510 | 34.13490  | -14.69800 |
| C  | 53.12470 | 34.13830  | -14.31750 |
| H  | 52.45250 | 35.00220  | -14.37500 |
| Fe | 54.31060 | 33.39750  | -12.75070 |
| C  | 52.97410 | 30.72360  | -10.85470 |
| O  | 53.37410 | 29.67920  | -11.35770 |
| O  | 51.90070 | 30.81890  | -10.01630 |
| C  | 51.30940 | 29.70850  | -9.42890  |
| C  | 50.83560 | 28.59090  | -10.16690 |
| C  | 51.13850 | 29.72270  | -8.02450  |
| C  | 50.52750 | 28.65400  | -7.32660  |
| C  | 50.21920 | 27.48260  | -9.53230  |
| C  | 50.07240 | 27.53060  | -8.10130  |
| C  | 49.76210 | 26.34130  | -10.39140 |
| C  | 49.41590 | 25.43960  | -11.16990 |
| C  | 50.39860 | 28.77680  | -5.83790  |
| C  | 50.33180 | 28.97300  | -4.61370  |
| C  | 35.16250 | 2.55600   | 5.21340   |
| C  | 34.45130 | 1.52020   | 5.85590   |
| C  | 34.23000 | 1.51670   | 7.24830   |
| C  | 34.73570 | 2.58960   | 8.02540   |
| C  | 35.44640 | 3.65720   | 7.42660   |
| C  | 35.65900 | 3.63050   | 6.01300   |
| C  | 35.92650 | 4.75400   | 8.30110   |
| C  | 35.34310 | 2.45950   | 3.74500   |
| C  | 35.41840 | 2.25600   | 2.53170   |
| C  | 36.27170 | 5.61660   | 9.11090   |
| C  | 38.29930 | 10.47860  | 12.92020  |
| C  | 35.95130 | 1.49080   | -3.91060  |
| C  | 32.50850 | -0.92000  | 9.52590   |
| C  | 31.27800 | -1.13350  | 8.87890   |
| C  | 30.46580 | -2.22590  | 9.23960   |
| C  | 32.90190 | -1.81360  | 10.54520  |
| C  | 32.10370 | -2.91880  | 10.92200  |
| C  | 30.85810 | -3.13350  | 10.25740  |
| O  | 32.63680 | -3.68920  | 11.94320  |
| C  | 31.97640 | -4.86340  | 12.41630  |
| C  | 32.82470 | -5.48980  | 13.53330  |
| O  | 32.33640 | -6.77670  | 13.91420  |
| C  | 33.15830 | -7.36530  | 14.92340  |
| C  | 32.86490 | -8.86200  | 15.11370  |
| O  | 31.61270 | -9.06080  | 15.76150  |
| O  | 30.07900 | -4.22140  | 10.59190  |
| C  | 28.68830 | -4.21110  | 10.28890  |
| C  | 28.05090 | -5.45780  | 10.92390  |
| O  | 28.07150 | -5.37300  | 12.34620  |
| C  | 26.91500 | -4.77510  | 12.93170  |
| C  | 25.75920 | -5.78490  | 13.05740  |
| O  | 26.24910 | -6.98340  | 13.64360  |
| C  | 25.21750 | -7.89060  | 14.01850  |
| C  | 25.79380 | -9.31450  | 14.02050  |
| O  | 26.89140 | -9.41880  | 14.92500  |
| C  | 31.40640 | -10.43500 | 16.10020  |
| C  | 30.18210 | -10.59140 | 17.01310  |

|   |          |           |          |
|---|----------|-----------|----------|
| O | 29.00790 | -10.26860 | 16.27800 |
| C | 26.66270 | -9.87060  | 16.20930 |
| C | 27.79390 | -10.31270 | 16.93470 |
| C | 25.38730 | -9.88220  | 16.82640 |
| C | 25.24050 | -10.33590 | 18.14960 |
| C | 26.36310 | -10.77810 | 18.86920 |
| C | 27.63420 | -10.76690 | 18.26760 |
| P | 36.53140 | 11.30260  | 12.86580 |
| P | 40.04290 | 9.61070   | 13.04970 |
| C | 40.20010 | 7.77600   | 12.58090 |
| C | 39.72720 | 6.82530   | 13.69850 |
| C | 41.27130 | 10.52980  | 11.94570 |
| C | 40.87390 | 10.51030  | 10.46280 |
| C | 40.73180 | 9.70530   | 14.81990 |
| C | 42.18790 | 9.21430   | 14.89850 |
| C | 36.04990 | 12.01290  | 14.56300 |
| C | 34.72480 | 12.79370  | 14.50700 |
| C | 36.56670 | 12.76720  | 11.67220 |
| C | 36.88430 | 12.36250  | 10.22570 |
| C | 35.04310 | 10.23680  | 12.35940 |
| C | 34.54780 | 9.31930   | 13.49510 |
| P | 37.74300 | 0.77890   | -3.69020 |
| C | 38.29830 | 0.20270   | -1.96570 |
| C | 37.82400 | -1.21000  | -1.58120 |
| C | 38.06760 | -0.68120  | -4.85700 |
| C | 36.92340 | -1.71360  | -4.88480 |
| C | 39.00190 | 2.10460   | -4.16930 |
| C | 38.93450 | 3.34640   | -3.26730 |
| P | 34.11730 | 2.12350   | -4.14150 |
| C | 33.97510 | 3.93000   | -3.61630 |
| C | 34.92480 | 4.83380   | -4.41790 |
| C | 33.44040 | 2.04030   | -5.92150 |
| C | 31.95080 | 2.41550   | -6.00600 |
| C | 32.88430 | 1.11340   | -3.13050 |
| C | 32.92530 | -0.37570  | -3.51630 |
| C | 40.70770 | 15.56330  | 14.23070 |
| C | 40.53480 | 14.23720  | 14.76830 |
| C | 41.64580 | 16.48550  | 14.81530 |
| C | 42.38720 | 16.05200  | 15.92730 |
| C | 41.31530 | 13.86360  | 15.88350 |
| C | 42.26390 | 14.74660  | 16.43220 |
| C | 39.65570 | 13.17430  | 14.20470 |
| C | 39.06900 | 12.15800  | 13.81370 |
| C | 41.99680 | 17.84590  | 14.31990 |
| C | 42.52420 | 18.92440  | 14.01800 |
| C | 47.64020 | 27.30330  | 8.57010  |
| C | 48.08450 | 28.43800  | 9.28920  |
| C | 48.70290 | 29.53150  | 8.63060  |
| C | 48.87910 | 29.47230  | 7.23280  |
| C | 48.46250 | 28.35820  | 6.47240  |
| C | 47.83720 | 27.27010  | 7.15470  |
| C | 48.70030 | 28.39310  | 5.00930  |
| C | 46.98250 | 26.21240  | 9.32870  |
| C | 46.43530 | 25.37800  | 10.05220 |
| C | 48.95670 | 28.54730  | 3.81360  |
| C | 50.12110 | 29.10510  | -2.56740 |
| C | 43.46950 | 20.60980  | 13.32070 |
| C | 49.63350 | 32.08720  | 11.22350 |
| C | 49.10530 | 33.29050  | 10.71970 |

|   |          |          |           |
|---|----------|----------|-----------|
| C | 49.50350 | 34.52570 | 11.26880  |
| C | 50.57170 | 32.14640 | 12.27590  |
| C | 50.98190 | 33.37370 | 12.84450  |
| C | 50.42840 | 34.58990 | 12.34220  |
| O | 51.90950 | 33.25470 | 13.86670  |
| C | 52.26650 | 34.37760 | 14.67270  |
| C | 53.19980 | 33.91720 | 15.79910  |
| O | 53.40530 | 34.95900 | 16.75160  |
| C | 54.31100 | 34.55110 | 17.77590  |
| C | 54.31420 | 35.53510 | 18.95430  |
| O | 55.04320 | 36.71190 | 18.62340  |
| O | 50.82200 | 35.79460 | 12.88480  |
| C | 49.98580 | 36.93920 | 12.76110  |
| C | 50.27570 | 37.86940 | 13.95470  |
| O | 51.62280 | 38.33920 | 13.95870  |
| C | 51.85720 | 39.47790 | 13.13520  |
| C | 51.72420 | 40.77450 | 13.94950  |
| O | 52.86370 | 40.92720 | 14.78980  |
| C | 52.83880 | 42.15960 | 15.51220  |
| C | 54.25550 | 42.52310 | 15.96870  |
| O | 54.74490 | 41.54950 | 16.88630  |
| C | 55.18650 | 37.58450 | 19.74100  |
| C | 56.23070 | 38.66240 | 19.43420  |
| O | 55.73810 | 39.60630 | 18.48280  |
| C | 56.03750 | 41.70280 | 17.35160  |
| C | 56.55700 | 40.68600 | 18.19190  |
| C | 56.85100 | 42.82010 | 17.02710  |
| C | 58.16120 | 42.92670 | 17.52310  |
| C | 58.67840 | 41.91990 | 18.35110  |
| C | 57.88420 | 40.80920 | 18.68320  |
| P | 48.39810 | 30.00510 | -2.79080  |
| P | 51.88490 | 28.28810 | -2.35760  |
| C | 52.83890 | 28.96570 | -0.87170  |
| C | 53.18680 | 30.45550 | -1.03930  |
| C | 51.68810 | 26.43110 | -2.08410  |
| C | 51.00030 | 25.73690 | -3.27020  |
| C | 53.09610 | 28.50050 | -3.81590  |
| C | 54.50970 | 27.99240 | -3.48220  |
| C | 47.93120 | 30.56730 | -4.55420  |
| C | 46.61680 | 31.36610 | -4.59580  |
| C | 48.28830 | 31.57810 | -1.75400  |
| C | 49.39230 | 32.58190 | -2.12440  |
| C | 47.00570 | 28.85930 | -2.23370  |
| C | 47.01300 | 27.52900 | -3.00250  |
| P | 41.82260 | 21.57840 | 13.69600  |
| C | 41.88840 | 23.46390 | 13.50000  |
| C | 42.66220 | 24.15750 | 14.63810  |
| C | 40.43460 | 20.95850 | 12.57120  |
| C | 40.75580 | 21.10610 | 11.07720  |
| C | 41.24590 | 21.31500 | 15.48940  |
| C | 39.91120 | 22.02660 | 15.77180  |
| P | 45.13970 | 19.63690 | 13.02590  |
| C | 45.77770 | 19.81770 | 11.25220  |
| C | 44.78810 | 19.24620 | 10.22300  |
| C | 46.47140 | 20.27880 | 14.19410  |
| C | 45.94520 | 20.39310 | 15.63300  |
| C | 45.07720 | 17.75340 | 13.29420  |
| C | 46.41220 | 17.04990 | 12.99320  |
| H | 54.15830 | 35.33320 | -10.58780 |

|    |          |          |           |
|----|----------|----------|-----------|
| O  | 43.11920 | 14.34200 | 17.42300  |
| C  | 44.28850 | 13.77770 | 17.04310  |
| O  | 44.50860 | 13.36060 | 15.90270  |
| C  | 45.35620 | 13.91120 | 18.08620  |
| C  | 46.70680 | 13.48250 | 17.90820  |
| C  | 47.34750 | 13.61460 | 19.18400  |
| C  | 46.40150 | 14.17960 | 20.10870  |
| C  | 45.16660 | 14.40310 | 19.41440  |
| C  | 46.58810 | 17.81920 | 18.43490  |
| C  | 47.79160 | 17.44970 | 17.76500  |
| C  | 47.44340 | 16.64810 | 16.64010  |
| C  | 46.02490 | 16.54580 | 16.60100  |
| C  | 45.49440 | 17.24860 | 17.72390  |
| H  | 44.23530 | 14.75020 | 19.86220  |
| H  | 44.44750 | 17.36800 | 17.99810  |
| Fe | 46.81840 | 15.61260 | 18.54180  |
| C  | 36.68860 | 6.67910  | 10.05170  |
| C  | 36.55010 | 6.57320  | 11.46060  |
| C  | 37.25600 | 7.86820  | 9.55500   |
| C  | 36.98050 | 7.63210  | 12.31690  |
| C  | 37.66580 | 8.88450  | 10.44920  |
| N  | 37.53610 | 8.77060  | 11.80370  |
| C  | 35.48850 | 2.01270  | 1.07410   |
| C  | 35.08900 | 0.79080  | 0.47300   |
| C  | 35.96650 | 3.01980  | 0.21290   |
| C  | 35.18490 | 0.60820  | -0.93940  |
| N  | 35.66210 | 1.60130  | -1.74790  |
| C  | 36.04120 | 2.78400  | -1.18070  |
| C  | 42.25130 | 10.52980 | -14.78810 |
| C  | 41.93410 | 9.49100  | -15.70200 |
| C  | 41.85980 | 10.33550 | -13.44780 |
| C  | 41.25770 | 8.31260  | -15.26330 |
| N  | 40.89820 | 8.14970  | -13.95510 |
| C  | 41.19100 | 9.14570  | -13.06650 |
| C  | 46.94710 | 19.67390 | -14.46110 |
| C  | 47.12870 | 19.82400 | -13.07070 |
| C  | 47.67350 | 21.02300 | -12.54750 |
| N  | 48.04840 | 22.06670 | -13.34540 |
| C  | 47.89030 | 21.95090 | -14.69870 |
| C  | 47.34430 | 20.76520 | -15.27790 |
| C  | 45.73890 | 24.37740 | 10.88980  |
| C  | 44.72800 | 23.57560 | 10.32570  |
| C  | 44.09240 | 22.58310 | 11.10790  |
| N  | 44.41690 | 22.35650 | 12.41570  |
| C  | 45.35940 | 23.15060 | 13.00470  |
| C  | 46.03630 | 24.16480 | 12.26160  |
| C  | 49.26780 | 28.74450 | 2.38080   |
| C  | 48.99760 | 27.72040 | 1.45190   |
| C  | 49.83540 | 29.94070 | 1.87000   |
| C  | 50.10360 | 30.08210 | 0.47540   |
| N  | 49.81870 | 29.07380 | -0.40300  |
| C  | 49.28350 | 27.91450 | 0.07920   |
| N  | 46.25550 | 15.54880 | -31.51370 |
| C  | 45.45190 | 14.58950 | -30.74070 |
| C  | 47.53610 | 15.91240 | -30.89170 |
| N  | 53.85300 | 38.99090 | 16.47850  |
| C  | 52.65860 | 38.44760 | 17.14410  |
| C  | 54.57970 | 38.03640 | 15.62840  |
| N  | 29.35060 | -8.07610 | 14.68890  |



|   |          |           |           |
|---|----------|-----------|-----------|
| C | 29.15700 | -6.74410  | 15.27810  |
| C | 29.35660 | -8.10700  | 13.21820  |
| C | 31.21290 | -11.75130 | 11.76940  |
| C | 29.98460 | -11.81210 | 12.45350  |
| C | 29.37600 | -10.63060 | 12.91730  |
| C | 29.99770 | -9.38070  | 12.70390  |
| C | 31.22530 | -9.32410  | 12.00900  |
| C | 31.83220 | -10.50740 | 11.54500  |
| C | 28.59990 | -7.09880  | 19.56110  |
| C | 29.90040 | -7.06060  | 19.02370  |
| C | 30.08520 | -6.93220  | 17.63350  |
| C | 28.96770 | -6.84550  | 16.77580  |
| C | 27.66580 | -6.87250  | 17.32000  |
| C | 27.48320 | -7.00280  | 18.70980  |
| C | 49.52790 | 18.83640  | -33.39330 |
| C | 48.48530 | 19.23790  | -32.53690 |
| C | 47.84840 | 18.29210  | -31.71050 |
| C | 48.25100 | 16.93940  | -31.74210 |
| C | 49.30430 | 16.54350  | -32.59360 |
| C | 49.93840 | 17.49050  | -33.42010 |
| C | 41.53820 | 14.03950  | -32.52870 |
| C | 42.69490 | 13.68080  | -33.24550 |
| C | 43.96580 | 13.85090  | -32.66470 |
| C | 44.08550 | 14.38820  | -31.36390 |
| C | 42.92190 | 14.73660  | -30.64490 |
| C | 41.65120 | 14.56540  | -31.22800 |
| C | 50.30330 | 41.64640  | 18.88920  |
| C | 49.77240 | 40.87410  | 17.83910  |
| C | 50.53450 | 39.83210  | 17.27610  |
| C | 51.83230 | 39.55860  | 17.76030  |
| C | 52.35600 | 40.33140  | 18.82030  |
| C | 51.59390 | 41.37440  | 19.37960  |
| C | 58.33830 | 39.83680  | 14.44200  |
| C | 57.14360 | 40.22210  | 13.80510  |
| C | 55.92340 | 39.62390  | 14.17410  |
| C | 55.89480 | 38.64120  | 15.18730  |
| C | 57.09630 | 38.25070  | 15.81640  |
| C | 58.31530 | 38.84940  | 15.44480  |
| H | 46.44180 | 15.17920  | -32.44210 |
| H | 45.70560 | 16.39430  | -31.65160 |
| H | 53.57350 | 39.78300  | 15.90470  |
| H | 54.49560 | 39.35680  | 17.17670  |
| H | 30.22830 | -8.45570  | 15.04010  |
| H | 28.61790 | -8.69610  | 15.02470  |
| O | 49.14420 | 30.68150  | 9.25910   |
| C | 49.14930 | 30.74410  | 10.68650  |
| O | 33.50900 | 0.44950   | 7.74970   |
| C | 33.36840 | 0.28630   | 9.16230   |
| O | 45.36020 | 14.69850  | -19.60930 |
| C | 45.84300 | 15.76500  | -20.42780 |
| H | 44.19180 | 13.00240  | -18.12670 |
| H | 46.10800 | 16.84510  | -18.05160 |
| H | 44.53470 | 15.16470  | -14.40170 |
| H | 47.05000 | 13.49100  | -21.38730 |
| H | 47.46730 | 12.85280  | -23.72800 |
| H | 45.11220 | 17.09780  | -22.73280 |
| H | 46.46770 | 16.36590  | -26.95040 |
| H | 44.88630 | 15.56740  | -26.84700 |
| H | 43.83930 | 17.88220  | -26.98030 |

|   |          |          |           |
|---|----------|----------|-----------|
| H | 45.44710 | 18.54550 | -27.23290 |
| H | 43.57690 | 19.09840 | -28.93690 |
| H | 45.16790 | 19.19660 | -29.65670 |
| H | 42.86470 | 17.44900 | -30.71610 |
| H | 43.18330 | 19.08790 | -31.22910 |
| H | 48.83760 | 14.07430 | -25.44760 |
| H | 48.09380 | 12.63130 | -26.11760 |
| H | 48.36380 | 15.27610 | -27.65620 |
| H | 49.63960 | 14.10270 | -27.67060 |
| H | 49.57630 | 12.50130 | -29.27240 |
| H | 48.52720 | 11.61910 | -28.17430 |
| H | 48.25630 | 10.70140 | -30.39740 |
| H | 46.76010 | 11.53120 | -29.99590 |
| H | 47.86230 | 10.92800 | -32.65280 |
| H | 46.39460 | 11.88010 | -32.50240 |
| H | 49.03270 | 12.90400 | -33.67590 |
| H | 47.73200 | 12.21400 | -34.65010 |
| H | 43.36940 | 16.69360 | -33.11760 |
| H | 43.38340 | 18.42990 | -33.32990 |
| H | 44.57990 | 17.53330 | -35.16380 |
| H | 45.75570 | 18.34470 | -34.12420 |
| H | 49.20170 | 13.67650 | -35.75360 |
| H | 49.62200 | 15.20100 | -37.60200 |
| H | 48.28180 | 17.27230 | -37.86120 |
| H | 46.51430 | 17.81030 | -36.27420 |
| H | 52.10610 | 22.22190 | -10.61160 |
| H | 51.11090 | 23.45370 | -9.90800  |
| H | 50.13190 | 20.62730 | -10.67180 |
| H | 50.59230 | 21.13850 | -9.06650  |
| H | 49.17520 | 21.84910 | -9.80150  |
| H | 51.91080 | 21.21040 | -13.16520 |
| H | 50.26540 | 20.81650 | -13.34860 |
| H | 52.07800 | 22.46420 | -15.15440 |
| H | 51.00260 | 21.17250 | -15.60040 |
| H | 50.37460 | 22.79150 | -15.28870 |
| H | 51.64980 | 24.76020 | -13.89560 |
| H | 51.79250 | 25.36350 | -12.27280 |
| H | 53.47670 | 23.05910 | -13.37620 |
| H | 53.98910 | 24.70980 | -13.13140 |
| H | 53.58830 | 23.71950 | -11.74670 |
| H | 46.91830 | 25.31050 | -9.95500  |
| H | 45.32980 | 25.19530 | -10.62130 |
| H | 45.64240 | 23.39550 | -8.98180  |
| H | 45.45760 | 22.66370 | -10.55790 |
| H | 47.05970 | 22.78450 | -9.80880  |
| H | 46.05480 | 26.75830 | -13.09570 |
| H | 47.60390 | 27.02560 | -12.39770 |
| H | 47.09080 | 25.75860 | -15.16290 |
| H | 47.65950 | 27.37910 | -14.85460 |
| H | 48.70420 | 26.02570 | -14.47960 |
| H | 45.93170 | 23.67490 | -14.44570 |
| H | 45.50750 | 22.65610 | -13.07000 |
| H | 43.55760 | 23.85400 | -13.90380 |
| H | 43.90230 | 24.40780 | -12.28200 |
| H | 44.32110 | 25.40470 | -13.67720 |
| H | 36.35170 | 8.08630  | -11.99410 |
| H | 37.19290 | 6.83730  | -11.13820 |
| H | 39.09760 | 8.42270  | -10.67910 |
| H | 38.31890 | 9.65930  | -11.68710 |

|   |          |          |           |
|---|----------|----------|-----------|
| H | 37.57980 | 9.13830  | -10.19240 |
| H | 37.08800 | 9.20810  | -14.39130 |
| H | 38.76140 | 9.50420  | -14.27640 |
| H | 37.19100 | 8.06170  | -16.44030 |
| H | 38.42980 | 9.26740  | -16.63150 |
| H | 38.85790 | 7.59000  | -16.28740 |
| H | 37.33120 | 5.68150  | -15.24790 |
| H | 36.88060 | 4.99840  | -13.71770 |
| H | 35.06530 | 6.67650  | -13.42490 |
| H | 35.49840 | 7.43380  | -14.95560 |
| H | 34.89990 | 5.79380  | -14.92560 |
| H | 41.15540 | 4.96100  | -10.33100 |
| H | 42.85400 | 5.01080  | -10.66800 |
| H | 42.78610 | 7.54470  | -10.77490 |
| H | 41.08360 | 7.47990  | -10.27780 |
| H | 42.34010 | 6.88430  | -9.21990  |
| H | 40.79330 | 3.14750  | -12.93110 |
| H | 41.54930 | 3.69440  | -14.39310 |
| H | 42.99760 | 2.91370  | -11.79710 |
| H | 42.93160 | 1.99630  | -13.28510 |
| H | 43.81920 | 3.49890  | -13.24160 |
| H | 43.25530 | 7.37920  | -13.36000 |
| H | 44.04010 | 5.92140  | -12.96140 |
| H | 42.43130 | 5.89350  | -15.56000 |
| H | 44.04090 | 6.61310  | -15.48170 |
| H | 43.80280 | 4.93740  | -15.08130 |
| H | 36.27240 | -3.31610 | -12.12890 |
| H | 32.81330 | -1.09990 | -13.72870 |
| H | 32.09190 | -3.70770 | -13.44220 |
| H | 34.57050 | -4.90350 | -17.07330 |
| H | 36.89120 | -4.86110 | -15.67950 |
| H | 37.45390 | -2.28310 | -15.06700 |
| H | 35.45750 | -0.72910 | -16.07150 |
| H | 35.97310 | -0.20080 | -8.95490  |
| H | 37.49330 | 1.66380  | -12.50240 |
| H | 37.81710 | 3.70530  | -8.69890  |
| H | 52.08280 | 33.58740 | -10.73190 |
| H | 55.82290 | 31.31650 | -11.27080 |
| H | 56.46560 | 33.93320 | -10.89280 |
| H | 51.72030 | 32.44920 | -13.84270 |
| H | 53.89710 | 30.85860 | -14.21730 |
| H | 55.95750 | 32.43850 | -14.99020 |
| H | 55.06250 | 34.99220 | -15.09540 |
| H | 50.95810 | 28.59740 | -11.24200 |
| H | 51.49530 | 30.59110 | -7.48590  |
| H | 49.60490 | 26.70020 | -7.59410  |
| H | 34.05750 | 0.69400  | 5.28000   |
| H | 34.57290 | 2.60660  | 9.09300   |
| H | 36.20140 | 4.43560  | 5.54200   |
| H | 30.94960 | -0.45910 | 8.10200   |
| H | 29.53640 | -2.35470 | 8.70690   |
| H | 33.83730 | -1.66070 | 11.06240  |
| H | 30.98690 | -4.62630 | 12.80940  |
| H | 31.87030 | -5.58270 | 11.60300  |
| H | 33.85120 | -5.58500 | 13.17490  |
| H | 32.84620 | -4.82440 | 14.39790  |
| H | 34.20780 | -7.27480 | 14.63720  |
| H | 33.04440 | -6.82950 | 15.86650  |
| H | 32.90240 | -9.39100 | 14.16190  |

|   |          |           |          |
|---|----------|-----------|----------|
| H | 33.65930 | -9.28100  | 15.73420 |
| H | 28.21140 | -3.30010  | 10.65300 |
| H | 28.54510 | -4.26220  | 9.20910  |
| H | 27.03800 | -5.60650  | 10.54760 |
| H | 28.61790 | -6.33970  | 10.62410 |
| H | 27.18900 | -4.43010  | 13.92870 |
| H | 26.60060 | -3.88720  | 12.38130 |
| H | 24.96580 | -5.35470  | 13.67150 |
| H | 25.32660 | -6.00640  | 12.08100 |
| H | 24.81820 | -7.61340  | 14.99460 |
| H | 24.38930 | -7.85470  | 13.30820 |
| H | 25.02230 | -10.06170 | 14.21240 |
| H | 26.16910 | -9.54290  | 13.02280 |
| H | 31.29120 | -11.03700 | 15.19740 |
| H | 32.27580 | -10.82380 | 16.63340 |
| H | 30.12700 | -11.62580 | 17.35690 |
| H | 30.28470 | -9.94940  | 17.88950 |
| H | 24.49900 | -9.54730  | 16.31420 |
| H | 24.26430 | -10.35030 | 18.61510 |
| H | 26.24750 | -11.13200 | 19.88480 |
| H | 28.46700 | -11.11850 | 18.85740 |
| H | 39.74000 | 7.51850   | 11.63020 |
| H | 41.25550 | 7.55880   | 12.40340 |
| H | 38.84650 | 7.16140   | 14.24020 |
| H | 39.52490 | 5.82570   | 13.30680 |
| H | 40.50720 | 6.69230   | 14.45180 |
| H | 41.42380 | 11.55470  | 12.28360 |
| H | 42.24780 | 10.05130  | 12.04140 |
| H | 41.68150 | 10.92840  | 9.85770  |
| H | 40.70840 | 9.49570   | 10.09640 |
| H | 39.99230 | 11.11450  | 10.26350 |
| H | 40.71240 | 10.70380  | 15.24770 |
| H | 40.12580 | 9.09220   | 15.48850 |
| H | 42.87380 | 9.86190   | 14.35130 |
| H | 42.53200 | 9.20720   | 15.93550 |
| H | 42.31670 | 8.19770   | 14.52600 |
| H | 35.94620 | 11.20700  | 15.29110 |
| H | 36.79230 | 12.69050  | 14.97850 |
| H | 34.44260 | 13.13660  | 15.50530 |
| H | 34.79310 | 13.68480  | 13.88230 |
| H | 33.88960 | 12.19460  | 14.14370 |
| H | 35.58460 | 13.24390  | 11.68110 |
| H | 37.26040 | 13.53700  | 12.01010 |
| H | 36.22110 | 11.57430  | 9.86490  |
| H | 36.73400 | 13.21710  | 9.56200  |
| H | 37.91850 | 12.05260  | 10.09970 |
| H | 34.21650 | 10.90250  | 12.10160 |
| H | 35.19220 | 9.67450   | 11.44070 |
| H | 33.89810 | 9.86630   | 14.18220 |
| H | 33.93730 | 8.50180   | 13.10450 |
| H | 35.33550 | 8.89150   | 14.11040 |
| H | 39.39010 | 0.17520   | -1.96130 |
| H | 38.06720 | 0.90980   | -1.17270 |
| H | 38.35580 | -1.97080  | -2.15760 |
| H | 38.05490 | -1.42230  | -0.53440 |
| H | 36.76290 | -1.39380  | -1.72100 |
| H | 38.30220 | -0.35300  | -5.86920 |
| H | 38.97210 | -1.19480  | -4.52490 |
| H | 35.98860 | -1.30430  | -5.26610 |

|   |          |          |          |
|---|----------|----------|----------|
| H | 37.18910 | -2.54270 | -5.54540 |
| H | 36.72800 | -2.16350 | -3.91230 |
| H | 40.00140 | 1.67210  | -4.08830 |
| H | 38.90280 | 2.39550  | -5.21450 |
| H | 38.02160 | 3.91910  | -3.41320 |
| H | 39.03180 | 3.09100  | -2.21060 |
| H | 39.76440 | 4.01830  | -3.49700 |
| H | 32.95140 | 4.26910  | -3.78650 |
| H | 34.12740 | 4.06340  | -2.54720 |
| H | 35.97240 | 4.57340  | -4.28420 |
| H | 34.69800 | 4.80240  | -5.48520 |
| H | 34.80550 | 5.87430  | -4.10740 |
| H | 33.96520 | 2.73760  | -6.57320 |
| H | 33.56440 | 1.04300  | -6.34630 |
| H | 31.62130 | 2.44570  | -7.04660 |
| H | 31.30800 | 1.68580  | -5.51110 |
| H | 31.73540 | 3.39690  | -5.58240 |
| H | 32.97840 | 1.25200  | -2.05680 |
| H | 31.87590 | 1.47940  | -3.33070 |
| H | 32.61680 | -0.52800 | -4.55300 |
| H | 33.90220 | -0.83950 | -3.39140 |
| H | 32.21780 | -0.94540 | -2.90800 |
| H | 40.13540 | 15.86570 | 13.36630 |
| H | 43.11470 | 16.70450 | 16.38510 |
| H | 41.24320 | 12.87390 | 16.31400 |
| H | 47.93520 | 28.46470 | 10.35850 |
| H | 49.35190 | 30.31490 | 6.74750  |
| H | 47.50610 | 26.41080 | 6.59240  |
| H | 48.38600 | 33.27190 | 9.91430  |
| H | 49.08650 | 35.42780 | 10.84700 |
| H | 50.98890 | 31.23500 | 12.67740 |
| H | 52.78410 | 35.13420 | 14.08200 |
| H | 51.37100 | 34.82180 | 15.10950 |
| H | 52.75550 | 33.05470 | 16.29870 |
| H | 54.15230 | 33.59240 | 15.37700 |
| H | 54.00720 | 33.57540 | 18.15970 |
| H | 55.31860 | 34.43390 | 17.37370 |
| H | 53.29510 | 35.77490 | 19.26110 |
| H | 54.79440 | 35.04410 | 19.80280 |
| H | 50.16610 | 37.43750 | 11.80850 |
| H | 48.93190 | 36.65920 | 12.79840 |
| H | 49.57360 | 38.70470 | 13.97460 |
| H | 50.11140 | 37.31210 | 14.87730 |
| H | 52.86280 | 39.41130 | 12.71970 |
| H | 51.17890 | 39.49600 | 12.28100 |
| H | 51.67610 | 41.61430 | 13.25390 |
| H | 50.80140 | 40.78610 | 14.53070 |
| H | 52.47480 | 42.97130 | 14.87960 |
| H | 52.15920 | 42.09500 | 16.36160 |
| H | 54.90790 | 42.59120 | 15.09630 |
| H | 54.22880 | 43.50260 | 16.44950 |
| H | 54.23000 | 38.03080 | 20.01510 |
| H | 55.53430 | 37.02120 | 20.60890 |
| H | 56.47000 | 39.18010 | 20.36510 |
| H | 57.14280 | 38.18480 | 19.07240 |
| H | 56.50140 | 43.62630 | 16.40120 |
| H | 58.76910 | 43.78590 | 17.27420 |
| H | 59.68500 | 42.00430 | 18.73770 |
| H | 58.33540 | 40.06850 | 19.32480 |

|   |          |          |          |
|---|----------|----------|----------|
| H | 52.35770 | 28.77660 | 0.08460  |
| H | 53.77840 | 28.41770 | -0.77870 |
| H | 52.32810 | 31.09720 | -1.21740 |
| H | 53.69380 | 30.83220 | -0.14720 |
| H | 53.88370 | 30.61320 | -1.86530 |
| H | 52.67600 | 25.98670 | -1.94720 |
| H | 51.15550 | 26.21440 | -1.15990 |
| H | 49.98970 | 26.10030 | -3.44510 |
| H | 51.57320 | 25.86040 | -4.19100 |
| H | 50.93180 | 24.66200 | -3.08880 |
| H | 52.78270 | 27.92200 | -4.68290 |
| H | 53.15990 | 29.54340 | -4.13020 |
| H | 54.51560 | 26.95560 | -3.14410 |
| H | 55.15210 | 28.03840 | -4.36420 |
| H | 55.00460 | 28.59740 | -2.72110 |
| H | 48.71270 | 31.19070 | -4.99130 |
| H | 47.78830 | 29.71110 | -5.21230 |
| H | 46.69700 | 32.32720 | -4.08560 |
| H | 46.34250 | 31.59880 | -5.62680 |
| H | 45.77480 | 30.82430 | -4.16450 |
| H | 47.32750 | 32.06040 | -1.94030 |
| H | 48.25940 | 31.39560 | -0.68360 |
| H | 50.39970 | 32.20220 | -1.96850 |
| H | 49.31190 | 32.90210 | -3.16540 |
| H | 49.29670 | 33.48990 | -1.52300 |
| H | 47.01960 | 28.68450 | -1.15940 |
| H | 46.04900 | 29.35370 | -2.41150 |
| H | 47.90360 | 26.93480 | -2.80920 |
| H | 46.15280 | 26.92230 | -2.71000 |
| H | 46.92920 | 27.68690 | -4.07910 |
| H | 42.24880 | 23.79140 | 12.52870 |
| H | 40.86630 | 23.84830 | 13.52190 |
| H | 43.59080 | 23.67070 | 14.92260 |
| H | 42.88980 | 25.19460 | 14.38000 |
| H | 42.05680 | 24.20870 | 15.54600 |
| H | 40.16750 | 19.92680 | 12.79910 |
| H | 39.53280 | 21.53640 | 12.78320 |
| H | 39.88430 | 20.82240 | 10.48260 |
| H | 40.98210 | 22.13990 | 10.81070 |
| H | 41.57300 | 20.46010 | 10.76190 |
| H | 41.09980 | 20.26910 | 15.75040 |
| H | 41.99600 | 21.69140 | 16.18640 |
| H | 39.61370 | 21.88090 | 16.81290 |
| H | 39.96210 | 23.10500 | 15.61880 |
| H | 39.09560 | 21.64020 | 15.15940 |
| H | 46.06600 | 20.83550 | 10.99950 |
| H | 46.71560 | 19.26730 | 11.16280 |
| H | 44.63860 | 18.17500 | 10.37010 |
| H | 43.81220 | 19.72550 | 10.24880 |
| H | 45.18290 | 19.36570 | 9.21170  |
| H | 47.30290 | 19.57330 | 14.21060 |
| H | 46.92960 | 21.20760 | 13.86260 |
| H | 46.76150 | 20.64350 | 16.31570 |
| H | 45.18280 | 21.16080 | 15.75740 |
| H | 45.53980 | 19.44510 | 15.99000 |
| H | 44.83560 | 17.53850 | 14.33330 |
| H | 44.31100 | 17.28760 | 12.67560 |
| H | 46.71040 | 17.13260 | 11.94830 |
| H | 47.22930 | 17.42370 | 13.61160 |

|   |          |           |           |
|---|----------|-----------|-----------|
| H | 46.33560 | 15.98320  | 13.21260  |
| H | 47.13100 | 13.01710  | 17.01880  |
| H | 48.35130 | 13.26630  | 19.43720  |
| H | 46.57020 | 14.32970  | 21.17750  |
| H | 46.52170 | 18.45970  | 19.31700  |
| H | 48.79990 | 17.76320  | 18.04480  |
| H | 48.14510 | 16.23010  | 15.91760  |
| H | 45.46100 | 16.00830  | 15.84330  |
| H | 36.11110 | 5.66760   | 11.87770  |
| H | 37.36960 | 7.97850   | 8.48010   |
| H | 36.88520 | 7.55730   | 13.39010  |
| H | 38.10860 | 9.79260   | 10.07630  |
| H | 34.70760 | -0.00530  | 1.11220   |
| H | 36.27090 | 3.96850   | 0.64670   |
| H | 34.87790 | -0.31720  | -1.40470  |
| H | 36.40690 | 3.54930   | -1.84670  |
| H | 42.21960 | 9.61030   | -16.74670 |
| H | 42.08570 | 11.11610  | -12.72640 |
| H | 41.01780 | 7.51650   | -15.95300 |
| H | 40.89330 | 8.98940   | -12.04280 |
| H | 46.83640 | 19.00330  | -12.42080 |
| H | 47.79360 | 21.15250  | -11.48410 |
| H | 48.16690 | 22.79970  | -15.30930 |
| H | 47.21710 | 20.68190  | -16.35680 |
| H | 44.46130 | 23.73180  | 9.28390   |
| H | 43.34670 | 21.94070  | 10.67130  |
| H | 45.58310 | 22.97500  | 14.04820  |
| H | 46.79280 | 24.78860  | 12.73640  |
| H | 48.56480 | 26.79290  | 1.81720   |
| H | 50.06060 | 30.74990  | 2.56470   |
| H | 50.52870 | 30.99310  | 0.07990   |
| H | 49.06520 | 27.14200  | -0.64250  |
| H | 45.95100 | 13.62900  | -30.68210 |
| H | 45.34150 | 14.94760  | -29.71640 |
| H | 47.36670 | 16.32170  | -29.89490 |
| H | 48.16210 | 15.02690  | -30.77930 |
| H | 52.05520 | 37.89190  | 16.42720  |
| H | 52.93510 | 37.74300  | 17.92220  |
| H | 54.77070 | 37.11190  | 16.17100  |
| H | 53.98330 | 37.77400  | 14.75500  |
| H | 30.01240 | -6.10620  | 15.05410  |
| H | 28.28190 | -6.26810  | 14.84590  |
| H | 28.34060 | -8.03470  | 12.83350  |
| H | 29.90600 | -7.24740  | 12.83300  |
| H | 31.67670 | -12.66220 | 11.41550  |
| H | 29.50970 | -12.76950 | 12.62270  |
| H | 28.43540 | -10.70700 | 13.44320  |
| H | 31.71740 | -8.37780  | 11.83480  |
| H | 32.77470 | -10.46770 | 11.01750  |
| H | 28.45650 | -7.20590  | 20.62790  |
| H | 30.75320 | -7.13770  | 19.68390  |
| H | 31.08970 | -6.91620  | 17.23820  |
| H | 26.79590 | -6.81570  | 16.68040  |
| H | 26.48590 | -7.04200  | 19.12680  |
| H | 50.01250 | 19.55950  | -34.03560 |
| H | 48.17380 | 20.27310  | -32.52520 |
| H | 47.04220 | 18.61540  | -31.06920 |
| H | 49.62280 | 15.51120  | -32.64160 |
| H | 50.73370 | 17.18500  | -34.08670 |

|   |          |          |           |
|---|----------|----------|-----------|
| H | 40.56380 | 13.90860 | -32.98010 |
| H | 42.60410 | 13.27700 | -34.24540 |
| H | 44.83690 | 13.57430 | -33.24110 |
| H | 42.99220 | 15.14600 | -29.64710 |
| H | 40.75810 | 14.83710 | -30.68300 |
| H | 49.71960 | 42.44650 | 19.32490  |
| H | 48.77740 | 41.08580 | 17.47320  |
| H | 50.11000 | 39.24940 | 16.47320  |
| H | 53.34520 | 40.14810 | 19.21400  |
| H | 51.99720 | 41.96920 | 20.18860  |
| H | 59.27420 | 40.30430 | 14.16740  |
| H | 57.16850 | 40.98610 | 13.04060  |
| H | 55.01540 | 39.94340 | 13.68480  |
| H | 57.09380 | 37.50740 | 16.60170  |
| H | 59.23490 | 38.56390 | 15.93690  |
| H | 48.13910 | 30.59430 | 11.06960  |
| H | 49.77720 | 29.94540 | 11.08440  |
| H | 34.35410 | 0.18350  | 9.61890   |
| H | 32.89050 | 1.16590  | 9.59530   |
| H | 45.14650 | 16.60370 | -20.38350 |
| H | 46.80820 | 16.11350 | -20.05870 |
